# Supplementary material for: Prevalence and associated risk factors of hypertension among persons aged 15–49 in India: a cross-sectional study
Source: PubMed Central journal article supplement — BMJ Open. 2019 Dec 16;9(12):e029714. doi: 10.1136/bmjopen-2019-029714 (PMC6937064; doi:10.1136/bmjopen-2019-029714), 2019-12-16
Supplement: bmjopen-2019-029714.draft_revisions.pdf [file bmjopen-2019-029714.draft_revisions.pdf]

# BMJ Open

BMJ Open is committed to open peer review. As part of this commitment we make the peer review history of every article we publish publicly available.

When an article is published we post the peer reviewers' comments and the authors' responses online. We also post the versions of the paper that were used during peer review. These are the versions that the peer review comments apply to.

The versions of the paper that follow are the versions that were submitted during the peer review process. They are not the versions of record or the final published versions. They should not be cited or distributed as the published version of this manuscript.

BMJ Open is an open access journal and the full, final, typeset and author-corrected version of record of the manuscript is available on our site with no access controls, subscription charges or pay-per-view fees (<http://bmjopen.bmj.com>).

If you have any questions on BMJ Open's open peer review process please email [info.bmjopen@bmj.com](mailto:info.bmjopen@bmj.com)

# BMJ Open

## Prevalence and associated risk factors of hypertension in India: Evidence from NFHS

|                               |                                                                                                                                                                            |
|-------------------------------|----------------------------------------------------------------------------------------------------------------------------------------------------------------------------|
| Journal:                      | <i>BMJ Open</i>                                                                                                                                                            |
| Manuscript ID                 | bmjopen-2019-029714                                                                                                                                                        |
| Article Type:                 | Original research                                                                                                                                                          |
| Date Submitted by the Author: | 13-Feb-2019                                                                                                                                                                |
| Complete List of Authors:     | Ghosh, Soumitra; Tata Institute of Social Sciences, School of Health Systems Studies<br>Kumar, Manish; Tata Institute of Social Sciences, School of Health Systems Studies |
| Keywords:                     | Hypertension < CARDIOLOGY, prevalence, Factors, India, District                                                                                                            |
|                               |                                                                                                                                                                            |

SCHOLARONE™  
Manuscripts

1  
2  
3  
4  
5  
6  
7  
8  
9  
10  
11  
12  
13  
14  
15  
16  
17  
18  
19  
20  
21  
22  
23  
24  
25  
26  
27  
28  
29  
30  
31  
32  
33  
34  
35  
36  
37  
38  
39  
40  
41  
42  
43  
44  
45  
46  
47  
48  
49  
50  
51  
52  
53  
54  
55  
56  
57  
58  
59  
60

Full Title: **Prevalence and associated risk factors of hypertension in India: Evidence from NFHS**

**Authors:**

1. Soumitra Ghosh, PhD [Corresponding author]

Assistant Professor  
Centre for Health Policy, Planning and Management  
School of Health Systems Studies  
Tata Institute of Social Sciences (TISS)  
V.N.Purav Marg, Deonar  
Mumbai-88  
INDIA

Ph: +91-22-25525534;  
Fax: +91-22-25525050  
Email: [soumitraaiips@gmail.com](mailto:soumitraaiips@gmail.com); [soumitra@tiss.edu](mailto:soumitra@tiss.edu)  
URL: <https://www.tiss.edu/view/9/employee/soumitra/>  
<https://in.linkedin.com/in/soumitra-ghosh-1b343629>

2. Mr. Manish Kumar

Research Associate  
Tata Institute of Social Sciences (TISS)  
V.N.Purav Marg, Deonar  
Mumbai-88  
INDIA

Pin: 400088

Mobile: 9702511509

Email: [kumarmanishiips@gmail.com](mailto:kumarmanishiips@gmail.com)

**'Declarations of interest:** none'

**Financial disclosure statement:** We declare that we did not receive any specific funding from any source for this study.

# Prevalence and associated risk factors of hypertension in India: recent evidence from National Family Health Survey

## Abstract

### Objective

Hypertension is the single largest contributor to the avoidable deaths and diseases in India. This is the first attempt to provide estimates on the prevalence of hypertension at the national, state and district level, a prerequisite for designing effective interventions.

### Methods

We used data from the 4<sup>th</sup> round (2015-16) of National Family Health Survey (NFHS). In NFHS, all states were surveyed between 2015 and October 2016, gathering information from 811,918 persons. Hypertension was defined as systolic blood pressure (SBP)  $\geq 140$  mm Hg and/ or diastolic blood pressure (DBP)  $\geq 90$  mm Hg. The age standardised prevalence of hypertension was calculated for state comparison. Besides, multivariate logistic regression model was employed to assess the correlates of hypertension.

### Results

The age-standardized prevalence of hypertension in India was 11.3% and was 4 percentage points higher amongst males (13.8%) than among females (10.9%). Notably, the hypertension prevalence among the urban adults (12.5%) was marginally higher than among rural adults (10.6%). The proportion of population suffering from hypertension varied greatly between states, with a prevalence of 8.2% in Kerala to 20.3% in Sikkim. Obesity, consumption of tobacco and alcohol were found to be the major predictors of hypertension.

### Conclusions

The hypertension prevalence is now becoming more concentrated among the poor in both urban and rural areas. Policy measures should be taken to reduce the consumption of high calorie foods, tobacco and alcohol. On the other hand, a diet rich in fruits and vegetables, regular physical activity and weight control should be promoted.

**Key words:** Hypertension, prevalence, factors, state, district and India



## Article summary

### Strengths and limitations of the study

- Largest epidemiological study on hypertension based on the biomedical measurements in India
- First study to provide estimates on prevalence of hypertension at national, state and district level
- Multivariate analysis identified the key drivers of hypertension
- The use of cross-sectional data that does not allow for exploration of causal pathways underlying the reported associations
- The role of behavioural risk factors such as low fruit and vegetable intake and physical inactivity could not be explored in this analysis
- Findings are limited to the adults aged between 15 and 54

## Introduction

Hypertension is the single largest contributor to the avoidable deaths and diseases in India. It is a leading risk factor for CVDs, which accounted for 23% of total deaths and 32% of adult deaths in 2010-2013 (RGI, 2015). India has committed to take an array of actions to meet the SDG target of reducing premature mortality from NCDs by one-third by 2030 (SDG declaration). However, much of the success in meeting this target hinges on its ability to check the rise of hypertension. The Global Burden of Hypertension study has highlighted that of the global burden of 212 million DALYs related to hypertension, 18% occurred in India in 2015 (Forouzanfar et al., 2017). The burden of hypertension in India is expected to rise considerably in the coming years due to rapid environmental and life style changes that follow urbanization.

### *Monitoring and evaluation for SDG*

It is, therefore, imperative that blood pressure trends are monitored to evaluate the progress that the country makes vis-à-vis the SDG goal of reduction in NCD mortality. To do that, data on hypertension is needed so that stakeholders can design appropriate interventions and evaluate national programmes aimed at effectively addressing hypertension and associated NCDs. But there was a paucity of reliable information on the status of hypertension in India. As a result, to assess the magnitude of this problem, policy makers had to rely on community studies or surveys that provided self-reported data on hypertension (Roy et al., 2017; Devi et al., 2013; Agarwal, Bhalwar and Basannar 2008; Gupta, Gupta and Pednekar 2004). Further, data from small studies were extrapolated to obtain national level estimate on hypertension (Anchala R et al 2014). Although these studies were helpful and used as a key resource in the arsenal of health policy makers, in the absence of active surveillance or data from population based surveys, policy makers are unable to determine the true hypertension of the people of India.

The recent health surveys have measured blood pressure, providing an opportunity to explore the trends in prevalence of hypertension both at the national, sub-national (state) and district level. Given the heterogeneity in the demographic and socioeconomic conditions across states in India, there are considerable inter-state variations in hypertension prevalence. Besides that, socioeconomic disparities are widespread even within the state. Hence, estimates at the state and district levels are required for policy formulation, setting intervention priorities and to evaluate national programmes. This study is the first in India to provide estimates on the prevalence of

1  
2  
3 hypertension at the national level and by state, district, rural and urban areas and individual  
4 characteristics such as age, sex and economic status using the most recent large scale survey data.  
5  
6

## 7 **Methods**

### 8 **Data**

9  
10  
11 The current study is mainly based on the data from the 4<sup>th</sup> round of National Family Health Survey  
12 (NFHS). NFHS is the Indian version of Demographic and Health Survey (DHS) and is the only  
13 source of data that provides estimates on the social and demographic indicators up to the district  
14 level. It is a multistage stratified random sample survey, which gathers data primarily on  
15 demographic, socioeconomic and reproductive and child health (RCH) parameters but in the latest  
16 round, the scope has been widened with the inclusion of clinical, anthropometric and bio-chemical  
17 (CAB) tests and measurements of blood glucose and blood pressure (BP) for assessing the  
18 prevalence of non-communicable diseases such as diabetes and hypertension in the population.  
19 Additionally, it also collected information on behavioural risk factors such as consumption of  
20 alcohol and smoking. NFHS 4 was conducted during the period between 2015 and 2016 across all  
21 29 states and 7 Union Territories (UTs) in India. This data can be used for obtaining estimates for  
22 most indicators not only at the national and provincial level but also at the district level. Since the  
23 focus of this study is on hypertension, we provide the details regarding the BP measurement. For  
24 measuring BP for individuals, three blood pressure readings were recorded from men aged 15-54  
25 years and women 15-49 years on the left arm, using a Ross Max AW BP monitor model.  
26  
27  
28  
29  
30  
31  
32  
33  
34  
35  
36  
37

### 38 **Statistical analysis**

39  
40  
41 In NFHS, three blood pressure readings were taken. Based on average of second and third readings  
42 of blood pressure, hypertension was defined as systolic blood pressure of at least 140 mm Hg or  
43 diastolic blood pressure of at least 90 mm Hg. The definition was based on the criteria given by  
44 WHO and American Heart Association (Pickering et al 2005). To make the prevalence of  
45 hypertension comparable, age adjusted prevalence rates were calculated for all states, UTs and  
46 districts. Apart from calculating the prevalence of hypertension, multivariate logistic regression  
47 model was employed to assess the correlates of hypertension.  
48  
49  
50  
51  
52  
53  
54  
55  
56  
57  
58  
59  
60

## Dependent variable

Hypertension for adults aged between 15 and 49 years. The dichotomous variable, hypertension, was defined as 1=hypertensive, else=0.

## Explanatory variables

Predictors were selected based on their effects on hypertension.

*Sociodemographic variables:* Age, sex, marital status, caste, education, place of residence, wealth status. Besides sociodemographic variables, we included body mass index, smoking and alcohol consumption as proxy for behavioural risk factors.

## *Patient and Public Involvement*

Patients and public were not involved in the analysis of this study.

## Results

### Sample characteristics

As seen in table 803,412 adults were included in this study. A little more than half of the sample population (51.3%) were aged between 15-29 years; 13% of males and 27% of females never went to school and 13% of both sexes attended school only up to primary level. Almost 64% of men and 73% of women were currently married. A third of the study population were urban residents and a quarter of them were either overweight or obese. While 45% of males were users of some form of tobacco, the prevalence of tobacco use was only 6% among the females. Similarly, a significantly greater proportion of men (30%) reported consuming alcohol either almost every day, about once a week or less than once a week as compared to just 1% amongst women.

Table 1. Sample characteristics

| Sample Characteristics     | Total                    |         | Male    |        | Female  |         |      |
|----------------------------|--------------------------|---------|---------|--------|---------|---------|------|
|                            | N                        | %       | N       | %      | N       | %       |      |
| <b>Total</b>               | 803,412                  | 100     | 102,242 | 12.7   | 701,170 | 87.3    |      |
| <b>Hypertension</b>        | No                       | 690,537 | 89.5    | 91,792 | 85.7    | 604,641 | 89.9 |
|                            | Yes                      | 80,946  | 10.5    | 15,359 | 14.3    | 67,857  | 10.1 |
| <b>Age group</b>           | 15-19                    | 140,987 | 17.5    | 18,676 | 16.7    | 122,305 | 17.5 |
|                            | 20-29                    | 271,951 | 33.8    | 32,662 | 29.3    | 239,246 | 34.2 |
|                            | 30-39                    | 215,399 | 26.8    | 28,156 | 25.2    | 187,230 | 26.7 |
|                            | 40-49                    | 175,030 | 21.8    | 23,543 | 21.1    | 151,482 | 21.6 |
|                            | 50-54                    | 803,412 | 100     | 8,618  | 7.7     |         |      |
| <b>Marital Status</b>      | Not married              | 196,348 | 24.4    | 38,715 | 34.7    | 157,840 | 22.5 |
|                            | Married                  | 577,202 | 71.8    | 71,372 | 63.9    | 513,869 | 73.4 |
|                            | Widow/separated/divorced | 29,862  | 3.7     | 1,567  | 1.4     | 28,555  | 4.1  |
| <b>Caste</b>               | Others                   | 180,047 | 23.5    | 25,360 | 23.9    | 156,759 | 23.5 |
|                            | SC                       | 165,867 | 21.6    | 22,385 | 21.1    | 145,127 | 21.7 |
|                            | ST                       | 73,723  | 9.6     | 10,099 | 9.5     | 64,365  | 9.6  |
|                            | OBC                      | 346,814 | 45.3    | 48,315 | 45.5    | 302,190 | 45.2 |
| <b>Education</b>           | No education             | 198,884 | 24.8    | 14,196 | 12.7    | 186,843 | 26.7 |
|                            | Primary                  | 106,737 | 13.3    | 14,304 | 12.8    | 94,102  | 13.4 |
|                            | Secondary                | 392,853 | 48.9    | 64,093 | 57.4    | 332,438 | 47.5 |
|                            | Higher                   | 104,937 | 13.1    | 19,061 | 17.1    | 86,880  | 12.4 |
| <b>Place of residence</b>  | Urban                    | 271,551 | 33.8    | 40,073 | 35.9    | 234,652 | 33.5 |
|                            | Rural                    | 531,861 | 66.2    | 71,581 | 64.1    | 465,611 | 66.5 |
| <b>Wealth quintile</b>     | Poorest                  | 142,472 | 17.7    | 17,105 | 15.3    | 126,597 | 18.1 |
|                            | Poorer                   | 159,313 | 19.8    | 21,565 | 19.3    | 139,240 | 19.9 |
|                            | Middle                   | 166,795 | 20.8    | 23,800 | 21.3    | 144,657 | 20.7 |
|                            | Richer                   | 169,194 | 21.1    | 24,344 | 21.8    | 146,798 | 21.0 |
|                            | Richest                  | 165,638 | 20.6    | 24,840 | 22.3    | 142,971 | 20.4 |
| <b>BMI</b>                 | Normal (18.5-24.9)       | 467,495 | 74.3    | 68,531 | 76.1    | 403,972 | 74.0 |
|                            | Overweight (25.0-29.9)   | 123,473 | 19.6    | 18,082 | 20.1    | 107,254 | 19.6 |
|                            | Obese ( $\geq 30$ )      | 38,057  | 6.1     | 3,490  | 3.9     | 34,965  | 6.4  |
| <b>Tobacco use</b>         | No                       | 446,158 | 55.5    | 60,701 | 54.1    | 389,956 | 93.1 |
|                            | Yes                      | 357,254 | 44.5    | 50,953 | 45.9    | 310,307 | 6.9  |
| <b>Alcohol consumption</b> | Never drinks             | 750,089 | 95.2    | 76,400 | 70.2    | 678,980 | 98.8 |
|                            | Almost every day         | 4,909   | 0.6     | 4,026  | 3.7     | 1,497   | 0.2  |
|                            | About once a week        | 14,945  | 1.9     | 13,204 | 12.1    | 2,953   | 0.4  |
|                            | Less than once a week    | 17,948  | 2.3     | 15,192 | 14.0    | 3,994   | 0.6  |

## Prevalence of hypertension at national, state and district level

Table 1 shows crude and age standardized prevalence of hypertension amongst adults aged 15-49 years for the year 2015-16. The data shows that the age-standardized prevalence of hypertension in India was 11.3% and the prevalence was 4 percentage points higher amongst males (13.8%) as

compared to females (10.9%). Notably, the hypertension prevalence among the urban adults (12.5%) was marginally higher than among rural adults (10.6%).

Table 1. Prevalence of hypertension in India, 2015-2016

| Prevalence | Unadjusted  |                       | Adjusted    |                       |
|------------|-------------|-----------------------|-------------|-----------------------|
|            | %           | C.I.                  | %           | C.I.                  |
| Overall    | <b>10.5</b> | <b>(10.37, 10.62)</b> | <b>11.3</b> | <b>(11.16, 11.43)</b> |
| Male       | 14.3        | (13.97, 14.70)        | 13.8        | (13.46, 14.19)        |
| Female     | 10.1        | (09.96, 10.22)        | 10.9        | (10.79, 11.06)        |
| Rural      | 9.8         | (9.09, 9.94)          | 10.6        | (10.50, 10.78)        |
| Urban      | 11.8        | (11.12, 12.12)        | 12.5        | (12.25, 12.80)        |

Figure 1 and 2 show the state variation in the age-adjusted prevalence of hypertension amongst adults aged between 15 and 54 years. The results reveal that the age-standardised prevalence of hypertension varied greatly between states and UTs, with a prevalence of 8.2% in Kerala to a prevalence of 20.2% in Sikkim. Quite intriguingly, the hypertension prevalence was greatest among the north-eastern states-Sikkim (20.3%), Nagaland (17.6%), Assam (17.6%), Arunachal Pradesh (16.6%) and Tripura (15.4%).

**Figure 1. Age-adjusted prevalence of hypertension across states, 2015-16 (in percent)**

Hypertension prevalence was also very high in the following non-northeastern states-Jammu and Kashmir (15.8%), Punjab (14.8%), Himachal Pradesh (14.8%) and Telangana (14.2%). On the other hand, proportion of population suffering from hypertension was relatively low in states such as Kerala (8.2%), Bihar (8.8%), Delhi (8.6%), Rajasthan (9.1%), Uttar Pradesh (9.6%) and Jharkhand (9.6%).

**Fig 2. Prevalence of hypertension across states, India, 2015-16**

Figure 3 shows inter-district variation in hypertension prevalence. The proportion of hypertensive population varied tremendously, ranging between 3.5% in district Mahoba, Uttar Pradesh to 34.7% in district Dibang Valley, Arunachal Pradesh. A majority of districts across India recorded a high hypertension burden, with more than one-tenth of the adults aged 15-49 hypertensive in 427 districts. Only 10 districts had hypertension levels below 5% and all of them except one were in

1  
2  
3 EAG states. Several districts with alarmingly high prevalence of hypertension were clustered  
4 across north-eastern states. Five districts in Arunachal Pradesh, two districts in Punjab, one each  
5 in Sikkim, Assam and Andaman and Nicobar were among the top ten districts with the highest  
6 levels of hypertension. The results revealed that at least one in every five persons aged between  
7 15 and 49 were having hypertension in as many as 28 districts across India.  
8  
9

10  
11  
12 The findings highlighted that the prevalence of hypertension was higher in men than in women in  
13 most states and UTs, except in Delhi, West Bengal, Meghalaya and J&K (Figure2). The sex  
14 difference in prevalence of hypertension was highest in Andaman and Nicobar Islands (12.4%),  
15 followed by Sikkim (8.4%), Himachal Pradesh (7.3%) and Manipur (7.2%). The results also  
16 suggest that in general, the gender differentials were relatively smaller in low prevalence states  
17 than in high prevalence states. Figure3 shows the weighted prevalence of hypertension in rural and  
18 urban areas of all states. As shown in the above figure, the prevalence rate of hypertension was  
19 found to be higher in urban than in rural areas for most of the states. However, there were a few  
20 exceptions. The prevalence of hypertension was relatively higher amongst the rural folks than their  
21 urban counterparts in Punjab, Goa and Kerala.  
22  
23  
24  
25  
26  
27  
28  
29

### 30 **Fig 3. Prevalence of hypertension across districts, India, 2015-16**

31  
32  
33 Another interesting pattern emerges while comparing the prevalence of hypertension between high  
34 and low socioeconomic status (SES) categories within rural and urban areas of each of these states  
35 (Figure 4). The results suggest hypertension is no longer a disease of the rich. In fact, the  
36 distribution of the condition is changing, disproportionately affecting the economically  
37 disadvantaged in urban areas of states such as Punjab, Haryana, Jammu and Kashmir and most of  
38 the NE states. Furthermore, the phenomenon of higher prevalence of hypertension among the poor  
39 appears to be not limited to only urban areas. In rural areas of Chhattisgarh, Kerala and Mizoram,  
40 poorer individuals had higher prevalence than their richer counterparts. Also, the differences in  
41 prevalence of hypertension by low vs high SES categories were generally marginal in urban areas  
42 of most states (<2 percentage points). The weak association between GDP per capita of states and  
43 hypertension prevalence (Figure 5) is also the confirmation of the growing convergence of rich-  
44 poor difference in prevalence of hypertension, particularly in the urban areas.  
45  
46  
47  
48  
49  
50  
51  
52  
53  
54  
55  
56  
57  
58  
59  
60

**Figure 4. Prevalence of Hypertension amongst people with low and high socioeconomic status across rural and urban areas in all states in India, 2015-16.**

**Figure 5. Prevalence of hypertension and GDP per capita by state**

**Sociodemographic differentials in prevalence**

Both bi-variate and multivariate analyses were carried out to understand the relative importance of socioeconomic and behavioural risk factors of hypertension. Since the bivariate (Table A1) and multivariate analyses yielded very similar results, we are only presenting the findings of multivariate analysis here. Table 2 shows results for logistic regression of hypertension by its different covariates, separately for males and females. Not surprisingly, age was found to be an important predictor of hypertension. The likelihood of being hypertensive increased significantly with age. Odds Ratios suggest that men aged between 50 and 54 years and women aged 45-49 years were 9.1 and 7.1 times respectively more likely to have hypertension than the young adults (15-19 years). The differences in prevalence probabilities between married, widowed and single were statistically significant. Women who were widowed, separated and divorced were more likely to have hypertension than their 'single' counterparts (OR=1.15;  $p<0.001$ ). Interestingly, married men were found to be at greater risk of hypertension than unmarried men (OR=1.18;  $p<0.001$ ). Educational attainment seems to be inversely related with prevalence for women. While women with secondary (OR= 0.94;  $p<0.001$ ) or tertiary education (OR=0.77;  $p<0.001$ ) were less likely to be hypertensive as compared to their illiterate counterparts, we did not find any systematic relationship between education and hypertension in case of men.

We also looked at how economic status, proxied by asset index influences the risk of hypertension in males and females. Compared with those in poorest quintile, both men and women from middle and richer quintiles were having slightly higher likelihood of hypertension ( $\leq 0.52$  percentage points). Place of residence was not found to be statistically significantly associated with hypertension for males. However, females residing in urban areas were more likely to be at risk of hypertension than their rural folks. Interestingly, even after controlling for socioeconomic status and demographic variables, differences in prevalence of hypertension by social groups remained statistically significant. Tribal men and women were more likely to have the condition (Males: OR=1.27; Females: 1.09;  $p<0.001$ ) than their respective counterparts from advantaged social group.



**Table 2. Results of multivariate logistic regression on hypertension, India, 2015-16**

| Category                   | Male                     |          | Female       |                       |
|----------------------------|--------------------------|----------|--------------|-----------------------|
|                            | Odds ratio               | C.I. 95% | Odds ratio   | C.I. 95%              |
| <b>Age group</b>           | 15-19                    | 1        | 1            |                       |
|                            | 20-29                    | 2.578*** | (2.14, 3.10) | 1.819*** (1.67, 1.97) |
|                            | 30-39                    | 4.824*** | (3.92, 5.93) | 3.805*** (3.48, 4.15) |
|                            | 40-49                    | 8.255*** | (6.71, 10.1) | 7.064*** (6.46, 7.72) |
|                            | 50-54 <sup>§</sup>       | 9.113*** | (7.32, 11.3) | -                     |
| <b>Marital Status</b>      | Unmarried                | 1        |              | 1                     |
|                            | Married                  | 1.180*** | (1.05, 1.32) | 1.051 (0.98, 1.12)    |
|                            | Widow/separated/divorced | 1.191    | (0.90, 1.57) | 1.153*** (1.05, 1.26) |
| <b>Caste</b>               | Others                   | 1        |              | 1                     |
|                            | SC                       | 1.083    | (0.98, 1.19) | 0.943*** (0.90, 0.98) |
|                            | ST                       | 1.275*** | (1.14, 1.42) | 1.093*** (1.03, 1.15) |
|                            | OBC                      | 1.012    | (0.93, 1.09) | 0.908*** (0.87, 0.94) |
| <b>Education</b>           | No education             | 1        |              | 1                     |
|                            | Primary                  | 1.226*** | (1.09, 1.36) | 1.037*** (0.99, 1.08) |
|                            | Secondary                | 1.162*** | (1.05, 1.27) | 0.941*** (0.90, 0.97) |
|                            | Higher                   | 1.214*** | (1.07, 1.36) | 0.775*** (0.72, 0.82) |
| <b>Place of residence</b>  | Urban                    | 1        |              | 1                     |
|                            | Rural                    | 0.962    | (0.89, 1.03) | 1.029* (0.99, 1.06)   |
| <b>Wealth Status</b>       | Poorest                  | 1        |              | 1                     |
|                            | Poorer                   | 1.130**  | (1.01, 1.25) | 1.066*** (1.02, 1.11) |
|                            | Middle                   | 1.346*** | (1.21, 1.49) | 1.088*** (1.04, 1.13) |
|                            | Richer                   | 1.517*** | (1.35, 1.69) | 1.165*** (1.10, 1.22) |
|                            | Richest                  | 1.410*** | (1.24, 1.59) | 1.104*** (1.04, 1.16) |
| <b>BMI</b>                 | Normal                   | 1        |              | 1                     |
|                            | Overweight (25.0-29.9)   | 2.035*** | (1.89, 2.18) | 1.942*** (1.87, 2.00) |
|                            | Obese (>=30)             | 3.135*** | (2.73, 3.59) | 3.149*** (3.00, 3.30) |
| <b>Tobacco use</b>         | No                       | 1        |              | 1                     |
|                            | Yes                      | 1.012    | (0.94, 1.07) | 1.071*** (1.02, 1.12) |
| <b>Alcohol consumption</b> | Never drinks             | 1        |              | 1                     |
|                            | almost every day         | 1.769*** | (1.56, 2.00) | 1.402*** (1.08, 1.80) |
|                            | About once a week        | 1.275*** | (1.16, 1.39) | 1.572*** (1.36, 1.81) |
|                            | Less than once a week    | 1.183*** | (1.08, 1.28) | 1.162** (1.01, 1.33)  |

§ - The data for the age group (50-54) is collected for males only. C.I. 95% - represents the 95 % confidence intervals. BMI – Body Mass Index  
 -the \*p<0.10, \*\*p<0.05, \*\*\*p<0.01, ® - reference category

We also examined the association between hypertension and health and life-style practices of the men and women. The Odds Ratios (ORs) indicate that both men and women with overweight (Males: OR=2.03; Females: OR=1.94, p<0.001) or obesity issue (Males and Females: OR=3.1, p<0.001) had significantly higher probability of hypertension than those with 'normal' BMI. The

1  
2  
3 differences in the probability of hypertension among women by tobacco use were small. Women  
4 who reported as tobacco users were more likely to be hypertensive (0.07 percentage points) than  
5 the non-users. Similarly, in case of men, the value of odds ratio suggests tobacco users had a higher  
6 likelihood of hypertension than the non-users but it was not statistically significant. Besides use of  
7 tobacco, alcohol consumption was also found to be positively related with hypertension. Both men  
8 and women who drank alcohol almost every day (Males: OR=1.76; Females: 1.40;  $p<0.000$ ), about  
9 once a week (Males: OR=1.27; Females: 1.57;  $p<0.001$ ) and less than once a week (Males:  
10 OR=1.18; Females: OR=1.16;  $p<0.001$ ) were significantly more likely to suffer from hypertension  
11 than men or women without alcohol use habit.  
12  
13  
14  
15  
16  
17  
18

## 19 Discussion

20  
21 This article provides estimates on the prevalence of hypertension across different geographical  
22 areas in India and examines socioeconomic and life-style factors associated with this condition, by  
23 exploiting the latest data from the 4<sup>th</sup> round (2015-16) of NFHS. Although some previous research  
24 have attempted to understand the burden of hypertension in India (Geldsetzer P et al 2018;  
25 Bhansali et al 2015; Anchala R et al 2014), to the best of our knowledge, this study is the first  
26 comprehensive assessment of hypertension prevalence using high quality survey data of each state  
27 and district of India.  
28  
29  
30  
31  
32  
33

34 One of our key findings is that more than one-tenth of the adults in India are hypertensive.  
35 However, the estimated hypertension prevalence differ from the reported prevalence in Geldsetzer  
36 et al's (2018) study on hypertension. This is arising mainly because of the reason that our estimates  
37 of prevalence pertain to adults aged 15-54 years while the said study provided estimates for adults  
38 aged 18 and above. Besides that, their estimates can not be generalised nationally as several states  
39 and UTs such as Delhi, Gujarat, Jammu and Kashmir, A & N islands, Dadra and Nagar Haveli,  
40 Daman and Diu, Lakshadweep were not covered in Annual Health Survey (AHS) and District  
41 Level Household Survey (DLHS) surveys<sup>1</sup> which they used for the estimation of hypertension  
42  
43  
44  
45  
46  
47  
48  
49

---

50  
51 <sup>1</sup> Researchers have raised concerns about the quality of the data generated by DLHS and AHS (Borkotoky, Unisa 2014; Dandona,  
52 Pandey and Dandona 2016). Concerning the BP measurement, many factors including the number of measurements used can  
53 significantly affect the estimates of hypertension prevalence (Birkett NJ 1997, McAlister FA, Straus SE 2001). Studies show that  
54 three readings of BP as against one or two, is likely to provide a more accurate estimate of prevalence, especially in case of  
55 discrepancy in readings between the first two (Stevens, McManus and Stevens 2018). However, blood pressure was measured only  
56 twice in the left upper arm in both DLHS and AHS. Not surprisingly, only a handful of publications can be found using AHS (total  
57 3 publications) and DLHS data (Dandona, Pandey and Dandona 2016).  
58  
59  
60

1  
2  
3 prevalence. Further, it should be noted while the clinical and anthropometric data for AHS was  
4 collected in 2014<sup>2</sup>, DLHS was carried out between 2012 and 2013. Hence, the pooled data may  
5 not provide true estimates of hypertension at the national level owing to inconsistencies between  
6 two surveys in terms of survey design, period of data collection (time gap) and non-inclusion of  
7 many states and UTs.  
8  
9

10  
11  
12 Hypertension was found to be more prevalent among males than among females. Although the  
13 prevalence of hypertension was relatively higher in urban than in rural areas at the national level,  
14 the rural-urban differences were not large, implying that hypertension epidemic is spreading very  
15 fast even in the rural population. This has serious implications for the rural people. The public  
16 health system through PHCs in rural areas is still focusing on infectious diseases, reproductive and  
17 child health and thus, has become too limited. So, people would have to rely on the private sector  
18 (wherever it is available) for the management of hypertension and its associated diseases, which  
19 would substantially add to their financial strain.  
20  
21  
22  
23  
24  
25

26  
27 Considerable inter-state and inter-district differences were found in the prevalence of  
28 hypertension. It was more common in north-eastern states, Jammu & Kashmir, Himachal Pradesh,  
29 Punjab, and Telengana than in Kerala and EAG states. The inter-state differentials might have  
30 been caused by the differences in risk exposure such as rising affluence, urbanization, sedentary  
31 life style, changing dietary habits, obesity prevalence, social stress and possibly, genetic factors.  
32 The finding of relatively lower hypertension prevalence in EAG states is consistent with evidence  
33 from the latest burden of disease study that classified these states as having low epidemiological  
34 transition level (Dandona et al., 2017). But surprisingly, Kerala, where epidemiologic transition is  
35 most advanced among all states, had recorded the lowest prevalence of hypertension. This may be  
36 due to the non-inclusion of males and females aged more than 54 and 49 years in NFHS. It should  
37 be noted that Kerala has the highest proportion of elderly population (13%) in India. However,  
38 more research is needed to pinpoint the reasons for low prevalence in Kerala. Interestingly, in  
39 north-eastern states, despite their low per capita income, the prevalence was way higher than states  
40 with much higher level of socioeconomic development. The higher burden of hypertension  
41 amongst the population of north-east could be attributed to ethnicity and food habits. Hypertension  
42  
43  
44  
45  
46  
47  
48  
49  
50  
51  
52  
53

---

54  
55 <sup>2</sup> Although AHS was conducted during 2013-2014, the biomarker component i.e., CAB data was collected only from a sub-sample  
56 of AHS in the year 2014. For details, see <http://www.censusindia.gov.in/2011census/hh-series/HH-2/CAB-Introduction.pdf>. In  
57 contrast, in DLHS, CAB tests were carried out in all selected households.  
58  
59  
60

1  
2  
3 has emerged as a major epidemic in many districts. Examples being two districts of Arunachal  
4 Pradesh, where every third person was hypertensive and more than a fifth of the population had  
5 the condition in as many as 28 districts.  
6  
7

8  
9 In majority of the states, hypertension prevalence was higher in urban than in rural areas, though  
10 the difference was small and at times, insignificant. However, in Goa, Punjab, Kerala and  
11 Nagaland, higher prevalence of hypertension was seen among rural people as compared to their  
12 urban counterparts. Such narrowing differentials may be the result of the factors mentioned in a  
13 recent study conducted in Punjab. Tripathy and others (2016) reported that there was no rural-  
14 urban differential in terms of dietary practices and prevalence of overweight and obesity barring  
15 the fact that a markedly higher proportion of individuals from rural areas always/often add salt  
16 before/when eating as compared to those from urban areas.  
17  
18  
19  
20  
21  
22

23 Another major finding was the weak link between economic growth (GDP per capita) and  
24 hypertension. Our study reveals that hypertension is affecting the people in poorer and not so poor  
25 states alike. Besides that, hypertension is not only affecting the affluent but is also widespread  
26 among the poor within states. Another salient finding is the increased proportion of poor suffering  
27 from hypertension in many states, particularly in the urban areas. This is in consonance with the  
28 findings from studies on non-communicable diseases (Anjana et al 2017). These findings paint a  
29 disturbing trend, indicating that it is just a matter of time when the less affluent segment of the  
30 population in other states would also face a disproportionately higher burden of hypertension. This  
31 would have a catastrophic impact on the poor as they do not have the means to cope up with the  
32 treatment costs associated with this chronic disease. Further, their productivity is also going to be  
33 significantly affected because of the delayed or no treatment for hypertension. This situation might  
34 have arisen due to factors such as the diffusion and adoption of 'modern' lifestyles (the changing  
35 dietary behaviour: smoking, drinking, unhealthy diets) across population groups (which is a result  
36 of urbanisation, aggressive push of junk food through advertising and marketing and related shifts  
37 in sociocultural practice), physical inactivity and high levels of depression and stress (linked to  
38 poverty and lack of equal opportunities) (Hawkes, 2006; Smit et al 2015).  
39  
40  
41  
42  
43  
44  
45  
46  
47  
48  
49  
50

51 Our study also corroborates the above observations as the evidences point to urban residence,  
52 obesity, tobacco and alcohol use as some of the key drivers of the hypertension epidemic in India.  
53 These were also supported by previous research in India (Tripathy et al 2016; Bhansali et al 2015;  
54  
55  
56  
57  
58  
59  
60

1  
2  
3 Kaur et al 2012). Surprisingly, use of tobacco was not found to increase the risk of hypertension  
4 for men. While it is difficult to explain why use of tobacco did not display statistically significant  
5 association with hypertension in male population, past studies have also yielded conflicting  
6 findings with regards to the association between tobacco consumption and hypertension. Tripathy  
7 et al (2016) and Bhansali et al (2015) did not find smoking as an independent risk factor of  
8 hypertension. On the other hand, Bhadoria et al (2014) reported that tobacco chewing and tobacco  
9 smoking are significant predictors of hypertension. Hence, this deserves further investigation.

## 16 **Conclusion**

17  
18 To conclude, hypertension epidemic is spreading alarmingly in India across rural and urban  
19 populations. More worryingly, the hypertension prevalence is now becoming more concentrated  
20 among the poor in both urban and rural areas. This phenomenon of rising hypertension prevalence  
21 among the least resourceful people has serious social and economic implications for the country  
22 and warrants immediate policy interventions to prevent the catastrophe. The district wise estimates  
23 on this condition should be used to plan for localised interventions so that the prevalence could be  
24 brought down significantly, which would help achieve the national target of 25% relative reduction  
25 in the prevalence of hypertension by 2025 (Ministry of Health and Family Welfare, 2013). We  
26 recommend universal blood pressure screening for high prevalence districts to track the progress  
27 of interventions. However, when it comes to interventions, the emphasis should be on primary  
28 prevention of hypertension. Policy measures should be taken to reduce the consumption of high  
29 calorie foods, tobacco and alcohol. On the other hand, a diet rich in fruits and vegetables, regular  
30 physical activity and weight control should be promoted.

## 41 **Contributorship statement**

42  
43 While SG conceptualised the paper, partly analysed the data and wrote the manuscript, MK carried  
44 out the analysis of the data.

## 47 **Funding**

48  
49 Authors did not receive any funding for conducting this research.

## 51 **Data sharing statement**

52  
53 The data used in this study came from the large scale surveys conducted by government agencies.  
54 All data are already in the public domain and can be accessed freely from the Government of  
55  
56  
57  
58  
59  
60

1  
2  
3 India's data sharing portals. Besides, NFHS data can also be obtained from the following website-  
4 www.iipsindia.org.  
5

### 6 **Conflicts of interest**

7  
8  
9 The authors have none to declare.  
10

### 11 **References**

12  
13  
14  
15  
16 Anchala R, Kannuri NK, Pant H, Khan H, Franco OH, Di Angelantonio E, Prabhakaran D  
17 (2014). Hypertension in India: a systematic review and meta-analysis of prevalence, awareness,  
18 and control of hypertension. *J Hypertens*. 2014 Jun; 32(6):1170-7.  
19

20  
21 Bhansali A, Dhandania VK, Deepa M, Anjana RM, Joshi SR, Joshi PP, Madhu SV, Rao PV,  
22 Subashini R, Sudha V, Unnikrishnan R, Das AK, Shukla DK, Kaur T, Mohan V, Pradeepa R  
23 (2015). Prevalence of and risk factors for hypertension in urban and rural India: the ICMR-  
24 INDIAB study. *J Hum Hypertens*, 29(3):204-9.  
25

26  
27 Bhadoria AS, Kasar PK, Toppo NA, Bhadoria P, Pradhan S, Kabirpanthi V. Prevalence of  
28 hypertension and associated cardiovascular risk factors in Central India. *J Family Community*  
29 *Med*. 2014; 21:29–38.  
30

31  
32 Birkett NJ (1997). The effect of alternative criteria for hypertension on estimates of prevalence  
33 and control. *J Hypertens* 1997;15:237–44  
34

35  
36 Borkotoky K, Unisa S (2014) Indicators to Examine Quality of Large Scale Survey Data: An  
37 Example through District Level Household and Facility Survey. *PLoS ONE* 9(3): e90113.  
38 <https://doi.org/10.1371/journal.pone.0090113>  
39

40  
41 Dandona L, Dandona R, Kumar GA, Shukla DK, Paul VK, Balakrishnan K, et al. Nations within  
42 a nation: variations in epidemiological transition across the states of India, 1990–2016 in the  
43 Global Burden of Disease Study. *The Lancet*. 2017; 390(10111):2437–60.  
44

45  
46 Farag YMK, Mittal B V, Keithi-Reddy SR, Acharya VN, Almeida AF, C A, et al. Burden and  
47 predictors of hypertension in India: results of SEEK (Screening and Early Evaluation of Kidney  
48 Disease) study. *BMC Nephrol*. 2014;15: 42.  
49

50  
51 Gupta PC, Gupta R, Pednekar MS. Hypertension prevalence and blood pressure trends in 88 653  
52 subjects in Mumbai, India. *J Hum Hypertens*. 2004;18: 907–10.  
53

54  
55 C. Hawkes (2006). Uneven dietary development: linking the policies and processes of  
56 globalization with the nutrition transition, obesity and diet-related chronic diseases, *Glob.*  
57 *Health*, 2 (1) (2006), p. 4  
58  
59



1  
2  
3 Jaya Prasad Tripathy, J. S. Thakur, Gursimer Jeet, Sohan Chawla, Sanjay Jain, Rajender Prasad  
4 (2016). Urban rural differences in diet, physical activity and obesity in India: are we witnessing  
5 the great Indian equalisation? Results from a cross-sectional STEPS survey. *BMC Public*  
6 *Health*. 2016; 16: 816. Published online 2016 Aug 18. doi: 10.1186/s12889-016-3489-8  
7

8  
9 Jackson SL, Zhang Z, Wiltz JL, et al. Hypertension Among Youths — United States, 2001–  
10 2016. *MMWR Morb Mortal Wkly Rep* 2018;67:758–762.  
11

12 McAlister FA, Straus SE (2001). Evidence based treatment of hypertension. Measurement of  
13 blood pressure: an evidence based review. *BMJ* 2001; **322**:908–11  
14

15  
16 Ministry of Health and Family Welfare (2013). National Action Plan and Monitoring Framework  
17 for Prevention and Control of NCDs, New Delhi. Accessed at [https://www.iccp-](https://www.iccp-portal.org/system/files/plans/India%20%20National_Action_Plan_and_Monitoring_Framework_Prevention_NCD_2013.pdf)  
18 [portal.org/system/files/plans/India%20%20National\\_Action\\_Plan\\_and\\_Monitoring\\_Framework](https://www.iccp-portal.org/system/files/plans/India%20%20National_Action_Plan_and_Monitoring_Framework_Prevention_NCD_2013.pdf)  
19 [Prevention\\_NCD\\_2013.pdf](https://www.iccp-portal.org/system/files/plans/India%20%20National_Action_Plan_and_Monitoring_Framework_Prevention_NCD_2013.pdf)  
20

21 Pickering TG, Hall JE, Appel LJ, Falkner BE, Graves J, Hill MN, Jones DW, Kurtz T, Sheps SG,  
22 Roccella EJ: Recommendations for Blood Pressure Measurement in Humans and Experimental  
23 Animals: Part 1: Blood Pressure Measurement in Humans: A Statement for Professionals From  
24 the Subcommittee of Professional and Public Education of the American Heart Association  
25 Council on High Blood Pressure Research. *Hypertens*. 2005, 45: 142-161  
26

27 Prabhdeep Kaur, Sudha Ramachandra Rao, Ezhil Radhakrishnan (2012). Prevalence, awareness,  
28 treatment, control and risk factors for hypertension in a rural population in South India  
29 *International Journal of Public Health*, 2012, Volume 57, Number 1, Page 87  
30

31  
32  
33 Registrar General of India (2015). **Report on Medical Certification of Cause of Death 2013**,  
34 Office of the Registrar General, New Delhi, India (2015). Available at:  
35 [www.censusindia.gov.in/2011-document/mccd\\_2013.pdf](http://www.censusindia.gov.in/2011-document/mccd_2013.pdf)  
36

37 Stevens SL, McManus RJ, Stevens RJ (2018). Current practice of usual clinic blood pressure  
38 measurement in people with and without diabetes: a survey and prospective ‘mystery shopper’  
39 study in UK primary care, *BMJ Open* 2018  
40

41 Tripathy JP, Thakur JS, Jeet G, Chawla S, Jain S. Alarming high prevalence of hypertension  
42 and pre-hypertension in North India-results from a large cross-sectional STEPS survey. Li Y,  
43 ed. *PLoS ONE*. 2017;12(12):e0188619. doi:10.1371/journal.pone.0188619.  
44  
45

46 VK Agrawal, R Bhalwar, DR Basannar (2011). Prevalence and Determinants of Hypertension in  
47 a Rural Community, *Med J Armed Forces India*. 2008 Jan; 64(1): 21–25.  
48  
49

50 Warren Smit, Ariane deLannoy, Robert V.H. Dover, Estelle. Lambert, Naomi Levitt, Vanessa Wa  
51 tson (2016). Making unhealthy places: The built environment and non-communicable diseases in  
52 Khayelitsha, Cape Town, *Health & Place*, Volume 39, 2016, pp. 196-203  
53  
54  
55  
56  
57  
58  
59

Table A1. Results of bi-variate analysis

| Age group                        | Category                 | Male          |               |                | P-value      | Female          |               |                | P-value |
|----------------------------------|--------------------------|---------------|---------------|----------------|--------------|-----------------|---------------|----------------|---------|
|                                  |                          | No<br>n (%)   | Yes<br>n (%)  | Total<br>n (%) |              | No<br>n (%)     | Yes<br>n (%)  | Total<br>n (%) |         |
|                                  | 15-19                    | 17,490 (97.5) | 436 (2.5)     | 17,926 (100)   |              | 1,14,037 (97.5) | 2,980 (2.5)   | 1,17,017 (100) |         |
|                                  | 20-29                    | 28,746 (91.9) | 2,526 (8.1)   | 31,272 (100)   |              | 2,17,394 (94.7) | 12,122 (5.3)  | 2,29,516 (100) |         |
|                                  | 30-39                    | 22,552 (83.4) | 4,470 (16.6)  | 27,022 (100)   | 0.000        | 1,58,186 (87.9) | 21,745 (12.1) | 1,79,931 (100) | 0.000   |
|                                  | 40-49                    | 16,971 (74.9) | 5,669 (25.1)  | 22,640 (100)   |              | 1,15,024 (78.7) | 31,011 (21.3) | 1,46,035 (100) |         |
|                                  | 50-54*                   | 6,033 (72.8)  | 2,259 (27.2)  | 8,292 (100)    |              | -               | -             | -              |         |
| Marital Status                   | Not married              | 34,885 (94.2) | 2,124 (5.8)   | 37,009 (100)   |              | 1,45,177 (96.5) | 5,189 (3.5)   | 1,50,366 (100) |         |
|                                  | Married                  | 55,673 (81.1) | 12,954 (18.9) | 68,627 (100)   | 0.000        | 4,36,671 (88.2) | 58,055 (11.8) | 4,94,726 (100) | 0.000   |
|                                  | Widow/separated/divorced | 1,233 (81.4)  | 281 (18.6)    | 1,514 (100)    |              | 22,793 (83.1)   | 4,613 (16.9)  | 27,406 (100)   |         |
| Caste                            | Others                   | 20,636 (84.6) | 3,738 (15.4)  | 24,374 (100)   |              | 1,33,916 (88.7) | 17,012 (11.3) | 1,50,928 (100) |         |
|                                  | SC                       | 18,587 (86.3) | 2,938 (13.7)  | 21,525 (100)   | 0.000        | 1,26,328 (90.6) | 12,988 (9.4)  | 1,39,316 (100) | 0.000   |
|                                  | ST                       | 8,221 (85.4)  | 1,404 (14.6)  | 9,625 (100)    |              | 55,331 (90.1)   | 6,026 (9.9)   | 61,357 (100)   |         |
| Education                        | OBC                      | 39,883 (85.8) | 6,587 (14.2)  | 46,470 (100)   |              | 2,62,845 (90.3) | 27,988 (9.7)  | 2,90,833 (100) |         |
|                                  | No education             | 11,607 (84.7) | 2,092 (15.3)  | 13,699 (100)   |              | 1,57,470 (87.1) | 23,191 (12.9) | 1,80,661 (100) |         |
|                                  | Primary                  | 11,513 (83.5) | 2,261 (16.5)  | 13,774 (100)   | 0.000        | 79,746 (87.9)   | 10,910 (12.1) | 90,656 (100)   | 0.000   |
| Place of residence               | Secondary                | 53,347 (86.8) | 8,122 (13.2)  | 61,469 (100)   |              | 2,90,869 (91.3) | 27,534 (8.7)  | 3,18,403 (100) |         |
|                                  | Higher                   | 15,325 (84.2) | 2,885 (15.8)  | 18,210 (100)   |              | 76,555 (92.5)   | 6,222 (7.5)   | 82,777 (100)   |         |
| Wealth Status                    | Urban                    | 31,872 (83.2) | 6,416 (16.8)  | 38,288 (100)   | 0.000        | 1,98,965 (88.7) | 25,318 (11.3) | 2,24,283 (100) | 0.000   |
|                                  | Rural                    | 59,920 (87.0) | 8,943 (13.0)  | 68,863 (100)   |              | 4,05,676 (90.5) | 42,539 (9.5)  | 4,48,215 (100) |         |
| BMI                              | Poorest                  | 14,876 (90.1) | 1,631 (9.9)   | 16,507 (100)   |              | 1,11,787 (91.6) | 10,125 (8.4)  | 1,21,912 (100) |         |
|                                  | Poorer                   | 18,478 (89.1) | 2,258 (10.9)  | 20,736 (100)   |              | 1,21,661 (91.1) | 12,023 (8.9)  | 1,33,684 (100) |         |
|                                  | Middle                   | 19,635 (85.9) | 3,214 (14.1)  | 22,849 (100)   | 0.000        | 1,25,615 (90.4) | 13,392 (9.6)  | 1,39,007 (100) | 0.000   |
|                                  | Richer                   | 19,316 (82.9) | 3,980 (17.1)  | 23,296 (100)   |              | 1,24,961 (88.6) | 16,075 (11.4) | 1,41,036 (100) |         |
| Use of tobacco                   | Richest                  | 19,486 (82.0) | 4,276 (18.0)  | 23,762 (100)   |              | 1,20,618 (88.1) | 16,242 (11.9) | 1,36,860 (100) |         |
|                                  | Normal (18.5-24.9)       | 57,404 (87.5) | 8,208 (12.5)  | 65,612 (100)   |              | 3,55,267 (91.7) | 32,039 (8.3)  | 3,87,306 (100) |         |
|                                  | Overweight (25.0-29.9)   | 12,566 (72.5) | 4,761 (27.5)  | 17,327 (100)   | 0.000        | 84,012 (81.5)   | 18,994 (18.5) | 1,03,006 (100) | 0.000   |
| Alcohol consumption              | Obese ( $\geq 30$ )      | 2,131 (63.8)  | 1,209 (36.2)  | 3,340 (100)    |              | 24,163 (71.9)   | 9,408 (28.1)  | 33,571 (100)   |         |
|                                  | No                       | 48,879 (86.9) | 7,334 (13.1)  | 56,213 (100)   | 0.000        | 5,54,543 (90.1) | 60,722 (9.9)  | 6,15,265 (100) | 0.000   |
| Frequency of alcohol consumption | Yes                      | 40,599 (84.1) | 7,659 (15.9)  | 48,258 (100)   |              | 38,769 (86.1)   | 6,239 (13.9)  | 45,008 (100)   |         |
|                                  | No                       | 64,287 (87.5) | 9,175 (12.5)  | 73,462 (100)   | 0.000        | 5,86,690 (89.9) | 65,665 (10.1) | 6,52,355 (100) | 0.000   |
| Overall                          | yes                      | 25,191 (81.2) | 5,818 (18.8)  | 31,009 (100)   |              | 6,623 (83.6)    | 1,296 (16.4)  | 7,919 (100)    |         |
|                                  | Never drinks             | 64,287 (87.5) | 9,175 (12.5)  | 73,462 (100)   |              | 5,86,690 (89.9) | 65,665 (10.1) | 6,52,355 (100) |         |
|                                  | almost every day         | 2,800 (73.3)  | 1,020 (26.7)  | 3,820 (100)    | 0.000        | 1,122 (81.5)    | 254 (18.5)    | 1,376 (100)    | 0.000   |
|                                  | About once a week        | 10,138 (80.7) | 2,424 (19.3)  | 12,562 (100)   |              | 2,287 (81.8)    | 507 (18.2)    | 2,794 (100)    |         |
| Less than once a week            | 12,253 (83.8)            | 2,374 (16.2)  | 14,627 (100)  |                | 3,214 (85.7) | 535 (14.3)      | 3,749 (100)   |                |         |
| Total                            |                          | 91,792 (85.7) | 15,359 (14.3) | 1,07,151 (100) |              | 6,04,641 (89.9) | 67,857 (10.1) | 6,72,498 (100) |         |

\*The data for the age group (15-54) is collected for males only. BMI – Body Mass Index



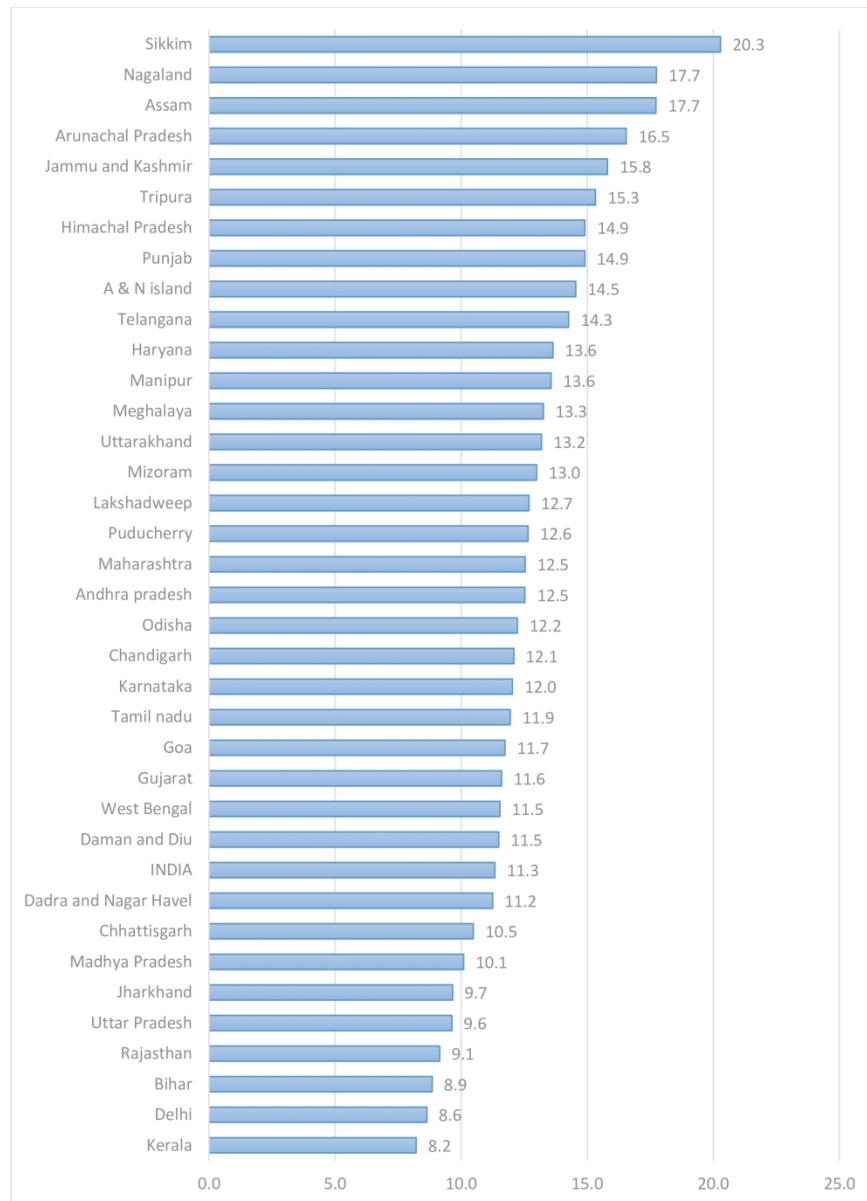

Figure 1. Age-adjusted prevalence of hypertension across states, 2015-16 (in percent)

153x211mm (300 x 300 DPI)

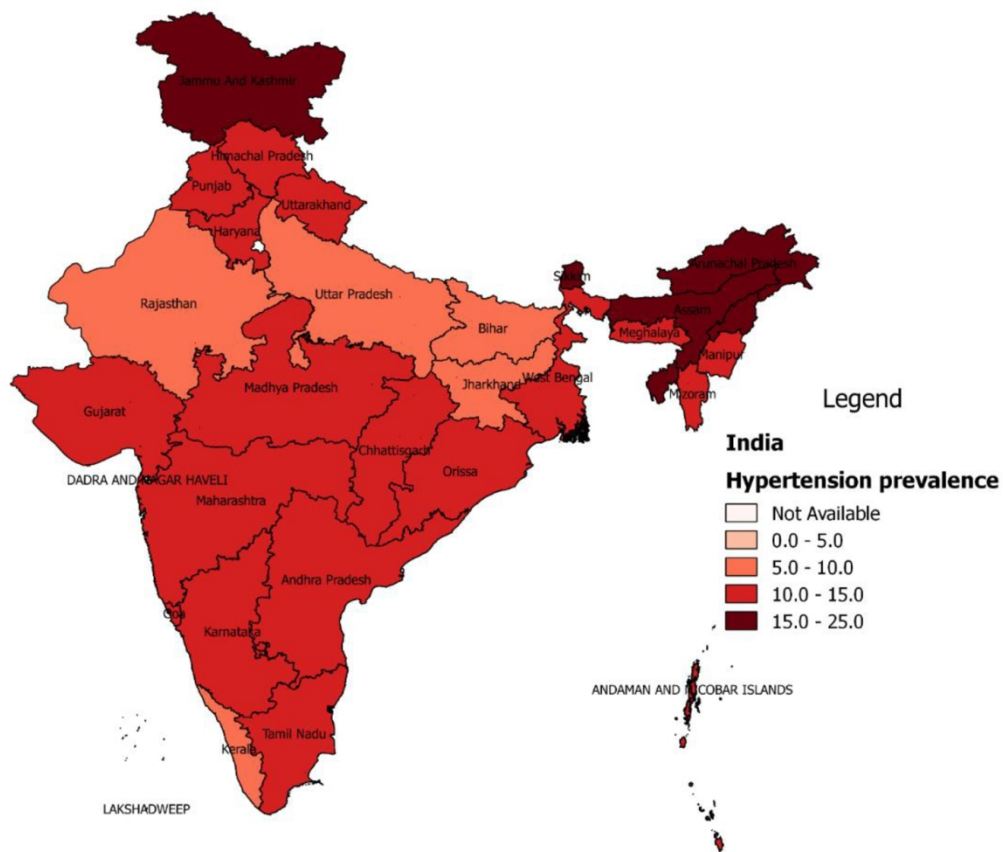

Fig 2. Prevalence of hypertension across states, India, 2015-16

123x106mm (300 x 300 DPI)

1  
2  
3  
4  
5  
6  
7  
8  
9  
10  
11  
12  
13  
14  
15  
16  
17  
18  
19  
20  
21  
22  
23  
24  
25  
26  
27  
28  
29  
30  
31  
32  
33  
34  
35  
36  
37  
38  
39  
40  
41  
42  
43  
44  
45  
46  
47  
48  
49  
50  
51  
52  
53  
54  
55  
56  
57  
58  
59  
60

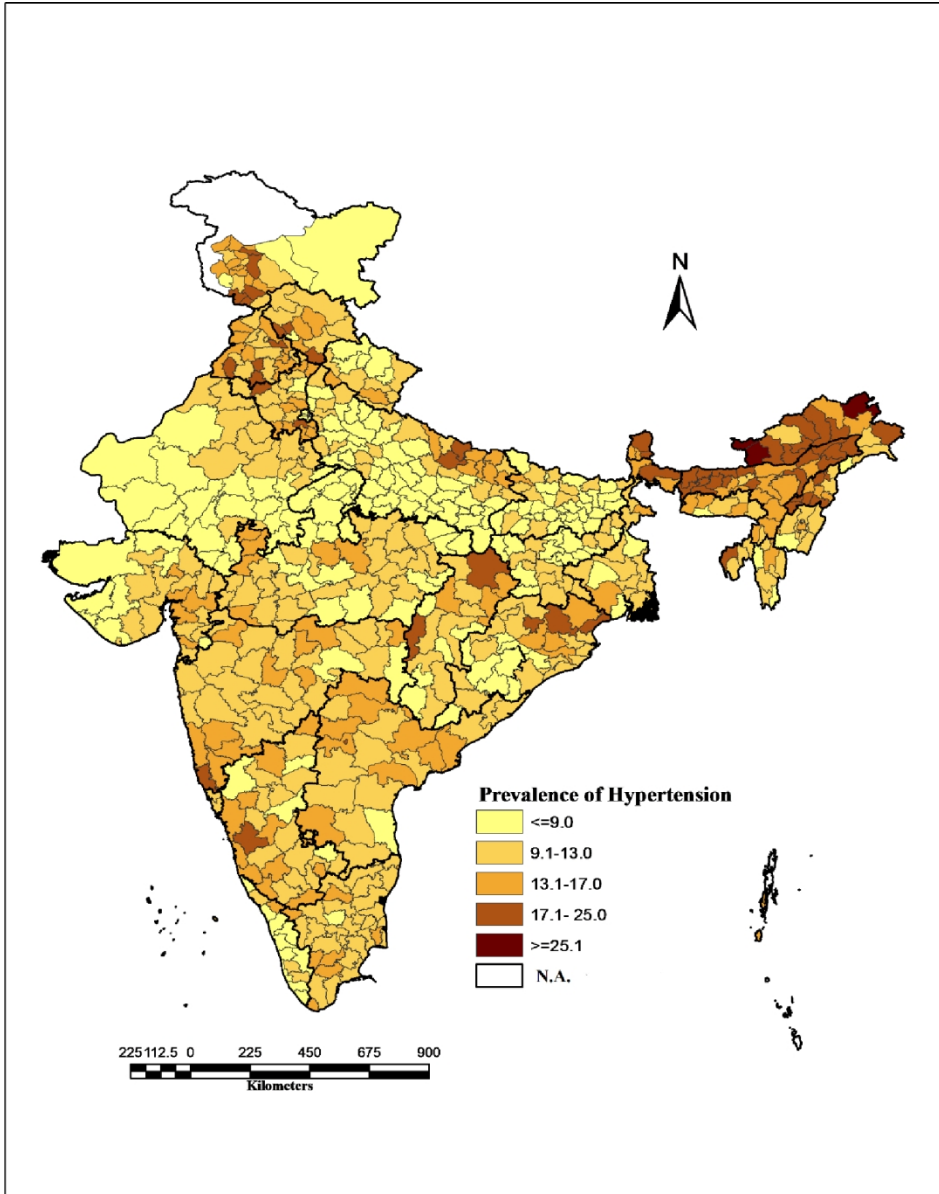

Figure2. Prevalence of hypertension across districts, India, 2015-16  
145x185mm (300 x 300 DPI)

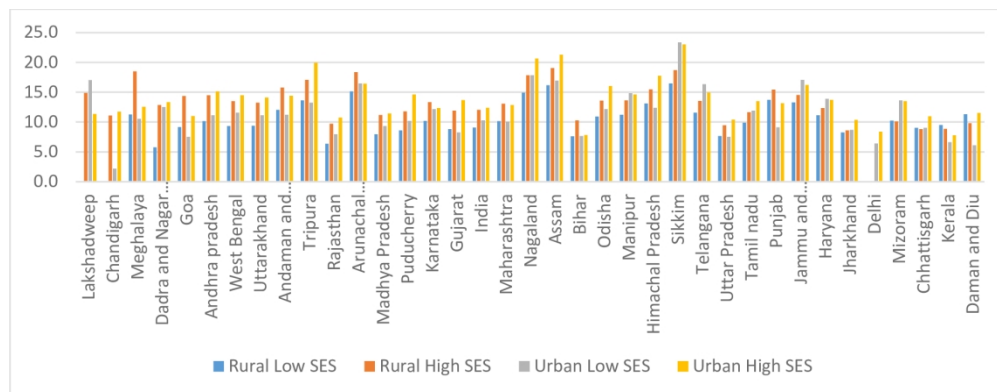

Figure4. Prevalence of Hypertension amongst people with low and high socioeconomic status across rural and urban areas in all states in India, 2015-16.

165x64mm (300 x 300 DPI)

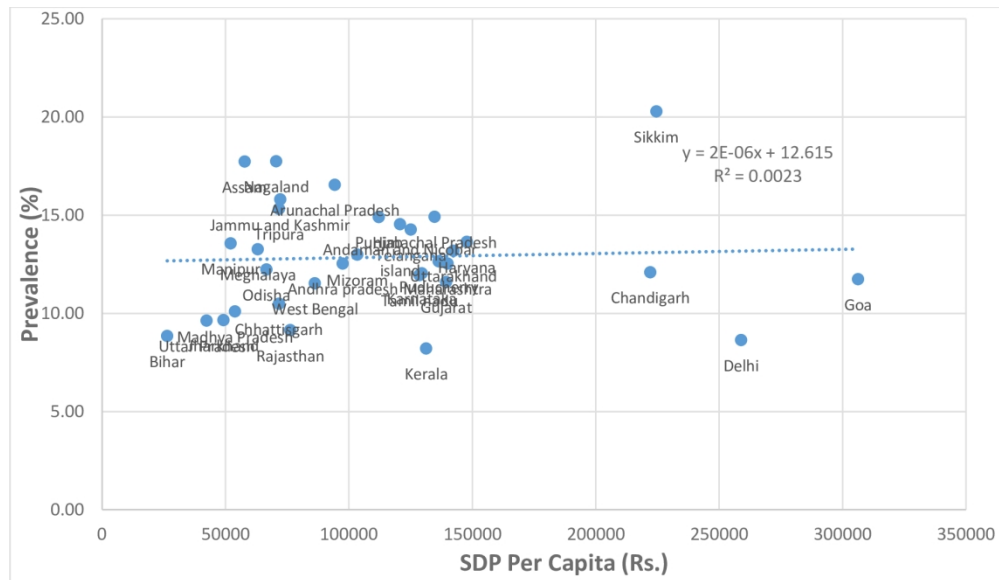

Figure 5. Prevalence of hypertension and GDP per capita by state

165x95mm (300 x 300 DPI)

# BMJ Open

## Prevalence and associated risk factors of hypertension among persons aged 15-49 in India: a cross sectional study

|                                 |                                                                                                                                                                            |
|---------------------------------|----------------------------------------------------------------------------------------------------------------------------------------------------------------------------|
| Journal:                        | <i>BMJ Open</i>                                                                                                                                                            |
| Manuscript ID                   | bmjopen-2019-029714.R1                                                                                                                                                     |
| Article Type:                   | Original research                                                                                                                                                          |
| Date Submitted by the Author:   | 07-Jul-2019                                                                                                                                                                |
| Complete List of Authors:       | Ghosh, Soumitra; Tata Institute of Social Sciences, School of Health Systems Studies<br>Kumar, Manish; Tata Institute of Social Sciences, School of Health Systems Studies |
| <b>Primary Subject Heading</b>: | Epidemiology                                                                                                                                                               |
| Secondary Subject Heading:      | Public health, Health policy                                                                                                                                               |
| Keywords:                       | Hypertension < CARDIOLOGY, prevalence, Factors, India, District, state                                                                                                     |
|                                 |                                                                                                                                                                            |

SCHOLARONE™  
Manuscripts

1  
2  
3  
4  
5  
6  
7  
8  
9  
10  
11  
12  
13  
14  
15  
16  
17  
18  
19  
20  
21  
22  
23  
24  
25  
26  
27  
28  
29  
30  
31  
32  
33  
34  
35  
36  
37  
38  
39  
40  
41  
42  
43  
44  
45  
46  
47  
48  
49  
50  
51  
52  
53  
54  
55  
56  
57  
58  
59  
60

Full Title: **Prevalence and associated risk factors of hypertension among persons aged 15-49 in India: a cross sectional study**

**Authors:**

1. Soumitra Ghosh, PhD [Corresponding author]

Assistant Professor  
Centre for Health Policy, Planning and Management  
School of Health Systems Studies  
Tata Institute of Social Sciences (TISS)  
V.N.Purav Marg, Deonar  
Mumbai-88  
INDIA

Ph: +91-22-25525534;  
Fax: +91-22-25525050  
Email: [soumitraips@gmail.com](mailto:soumitraips@gmail.com); [soumitra@tiss.edu](mailto:soumitra@tiss.edu)  
URL: <https://www.tiss.edu/view/9/employee/soumitra/>  
<https://in.linkedin.com/in/soumitra-ghosh-1b343629>

2. Mr. Manish Kumar

Research Associate  
Tata Institute of Social Sciences (TISS)  
V.N.Purav Marg, Deonar  
Mumbai-88  
INDIA

Pin: 400088

Mobile: 9702511509

Email: [kumarmanishiips@gmail.com](mailto:kumarmanishiips@gmail.com)

**'Declarations of interest:** none'

**Financial disclosure statement:** We declare that we did not receive any specific funding from any source for this study.

# Prevalence and associated risk factors of hypertension among persons aged 15-49 in India: a cross sectional study

## Abstract

### **Objective**

Hypertension is the single largest contributor to the avoidable deaths and diseases in India. This is the first attempt to provide estimates on the prevalence of hypertension at the national, state and district level, a prerequisite for designing effective interventions. Besides, the study aims to identify the risk factors of hypertension.

### **Methods**

We used data from the 4<sup>th</sup> round (2015-16) of National Family Health Survey (NFHS). In NFHS, all states were surveyed between January 2015 and December 2016, gathering information on a range of indicators including blood pressure from 811,918 persons. Hypertension was defined as systolic blood pressure (SBP)  $\geq 140$  mm Hg and/ or diastolic blood pressure (DBP)  $\geq 90$  mm Hg. The age adjusted prevalence of hypertension was calculated for state comparison, while multilevel logistic regression analysis was done to assess the correlates of hypertension.

### **Results**

The age-adjusted prevalence of hypertension in India was 11.3% (95% CI 11.16 to 11.43) among persons aged between 15 and 49 years and was 4 percentage points higher amongst males-13.8% (95% CI 13.46 to 14.19) than among females-10.9% (95% CI 10.79 to 11.06). Persons in the urban location (12.5%, 95% CI 12.25 to 12.80) had a marginally higher prevalence than persons in rural location-(10.6%, 95% CI 10.50 to 10.78). The proportion of population suffering from hypertension varied greatly between states, with a prevalence of 8.2% (95% CI 7.58, 8.85) in Kerala to 20.3% (95% CI 18.81, 21.77) in Sikkim. Advancing age, obesity/overweight, male sex, socioeconomic status and consumption of alcohol were found to be the major predictors of hypertension.



## Conclusions

Hypertension prevalence is now becoming more concentrated amongst the poor. Policy measures should be taken to improve the hazardous working conditions and growing social pressures of survival responsible for 'life-style' changes such as consumption of high calorie food and alcohol.

**Key words:** Hypertension, prevalence, factors, state, district and India

## Article summary

### Strengths and limitations of the study

- First epidemiological study to provide estimates on prevalence of hypertension at national, state and district level
- Multivariate analysis identified the key drivers of hypertension
- The use of cross-sectional data that does not allow for exploration of causal pathways underlying the reported associations
- The role of behavioural risk factors such as low fruit and vegetable intake and physical inactivity could not be explored in this analysis
- Findings are limited to the persons aged between 15 and 49

## Introduction

Hypertension is the single largest contributor to the avoidable deaths and diseases in India. It is a leading risk factor for cardiovascular disease, which accounted for 23% of total deaths and 32% of adult deaths in 2010-2013[1]. India has committed to take an array of actions to meet the Sustainable Development Goals (SDG) target of reducing premature mortality from non-communicable diseases (NCDs) by one-third by 2030. However, much of the success in meeting this target hinges on its ability to check the rise of hypertension. The Global Burden of Hypertension study has highlighted that of the global burden of 212 million DALYs related to hypertension, 18% occurred in India in 2015[2]. The burden of hypertension in India is expected to rise considerably in the coming years due to rapid environmental and 'life-style' changes that emanate from hazardous working conditions and growing social pressures of survival [3, 4].

### *Monitoring and evaluation for SDG*

It is, therefore, imperative that blood pressure trends are monitored to evaluate the progress that the country makes vis-à-vis the SDG goal of reduction in NCD mortality. To do that, data on hypertension is needed so that stakeholders can design appropriate interventions and evaluate national programmes aimed at effectively addressing hypertension and associated NCDs. But there was a paucity of reliable information on the status of hypertension in India. As a result, to assess the magnitude of this problem, policy makers had to rely on community studies or surveys that provided self-reported data on hypertension [5, 6, 7, 8]. Further, data from small studies were extrapolated to obtain national level estimate on hypertension [9]. Although these studies were helpful and used as a key resource in the arsenal of health policy makers, in the absence of active surveillance or data from population based surveys, policy makers are unable to determine the true hypertension of the people of India.

The recent health surveys have measured blood pressure, providing an opportunity to explore the trends in prevalence of hypertension both at the national, sub-national (state) and district level. Given the heterogeneity in the demographic and socioeconomic conditions across states in India, it is very likely that there would be considerable inter-state variations in hypertension prevalence. Moreover, the socioeconomic disparities are widespread even within the state. Hence, estimates at the state and district levels are required for policy formulation, setting intervention priorities and to evaluate national programmes. This study is the first in India to provide estimates on the

1  
2  
3 prevalence of hypertension at the national level and for each state, district, and by rural and urban  
4 areas and individual characteristics such as age, sex and economic status using the most recent  
5 large scale survey data. Aside from providing estimates on hypertension prevalence, an attempt  
6 was also made to identify the correlates of hypertension.  
7  
8  
9

## 10 **Methods**

### 11 **Data**

12  
13 The current study is mainly based on the data from the 4<sup>th</sup> round of National Family Health Survey  
14 (NFHS). NFHS is the Indian version of Demographic and Health Survey (DHS) carried out  
15 periodically in over 90 countries across the globe.  
16  
17  
18  
19

20  
21 It is a multistage stratified random sample survey, which gathers data primarily on demographic,  
22 socioeconomic and reproductive and child health (RCH) parameters but in the latest round, the  
23 scope has been widened with the inclusion of clinical, anthropometric and bio-chemical (CAB)  
24 tests and measurements of blood glucose and blood pressure (BP) for assessing the prevalence of  
25 non-communicable diseases such as diabetes and hypertension in the population. Additionally, it  
26 also collected information on behavioural risk factors such as consumption of alcohol and  
27 smoking. NFHS 4 was conducted during the period between 2015 and 2016 across all 29 states  
28 and 7 Union Territories (UTs) in India. This data can be used for obtaining estimates for many  
29 vital indicators not only at the national and provincial level but also at the district level. The  
30 household level questionnaire of NFHS collects details on the possession of certain assets and  
31 access to certain utilities. The information on assets and utilisation of utilities are used for  
32 constructing wealth index, which reflects the standard of living of households. The wealth index  
33 categorises the households into 5 wealth quintiles: 'poorest', 'poor', 'middle', 'rich' and richest.  
34  
35  
36  
37  
38  
39  
40  
41  
42  
43

### 44 **Statistical analysis**

45  
46 Hypertension was considered as the outcome variable of this study. Three blood pressure readings  
47 were taken in NFHS. The first measurement was discarded and then, based on the average of  
48 second and third readings of blood pressure, it was decided whether a participant was hypertensive  
49 or not. Hypertension was defined as systolic blood pressure of at least 140 mm Hg or diastolic  
50 blood pressure of at least 90 mm Hg. The definition was based on the criteria given by WHO and  
51 American Heart Association [10]. In addition, an individual is classified as having hypertension if  
52  
53  
54  
55  
56  
57  
58  
59  
60

1  
2  
3 she/he is currently taking antihypertensive medication to lower his or her blood pressure. The  
4 analysis was restricted to women and men age 15-49, after excluding men aged 49-54 (n=8,618)  
5 and missing values (n=32,268). Data were weighted prior to analysis.  
6  
7

8  
9 To make the prevalence of hypertension comparable, age adjusted prevalence rates were calculated  
10 for all states, UTs and districts using the direct standardization method. The national population,  
11 as per 2011 Census, was used as a reference population for carrying out the standardization  
12 technique. To understand how hypertension prevalence varies by socioeconomic status (SES), the  
13 wealth index was converted into a dichotomous variable; where the bottom 60% i.e., 'poorest',  
14 'poor' and 'middle' were combined into one group (low SES), the remaining two categories were  
15 clubbed into the other category (high SES). Besides conducting bivariate analyses, multi-level  
16 (first level: individual; second level: district; third level: state) logistic regression model with  
17 random intercepts and fixed slopes were employed to calculate multilevel odds ratios (OR) with  
18 corresponding 95% confidence intervals (CI).  
19  
20  
21  
22  
23  
24  
25

### 26 27 **Dependent variable**

28  
29 Hypertension for persons aged between 15 and 49 years. The dichotomous variable, hypertension,  
30 was defined as 1=hypertensive, else=0.  
31  
32

### 33 34 **Explanatory variables**

35  
36 Predictors were selected based on their effects on hypertension.  
37

38 *Sociodemographic variables:* Age, sex, marital status, caste<sup>1</sup>, education, place of residence,  
39 wealth status. Besides sociodemographic variables, we included body mass index, tobacco use and  
40 alcohol consumption as proxy for behavioural risk factors. The education categories are defined  
41 based on number of years of education completed by an individual: 0 year as "no education"; 1 to  
42 5 years as "primary education"; 6 to 12 years as "secondary education"; and more than 12 years  
43 of education attainment categorised as "higher studies".  
44  
45

46 All statistical analyses were performed using STATA 14.  
47  
48  
49

---

50  
51 <sup>1</sup> Indian society is mainly divided into four castes within the framework of the Hindu caste system. The castes used to  
52 be classified according to occupation. Historically, many sub-castes have faced discrimination, deprivation and social  
53 exclusion on account of their assigned 'low status'. Recognising the marginalisation of certain communities and  
54 socioeconomic differences among different population groups, the constitution of India categorised the Indian  
55 population into four major groups: Scheduled Tribe (ST), Scheduled Caste (SC), Other Backward Class (OBC) and  
56 General. ST is the most socio-economically disadvantaged group, followed by the SC and OBC and together they  
57 comprise 69% of India's population, with SC at 19.7%, ST at 8.5% and OBC at 41.1%.  
58  
59

### ***Patient and Public Involvement***

Patients and public were not involved in the analysis of this study.

## **Results**

### **Sample characteristics**

As seen in table1, of the total 779,649 persons who participated in the survey, a little more than half of them (51.3%) were aged between 15-29 years; 13% of males and 27% of females never went to school and 13% of both sexes attended school only up to primary level. Almost 64% of men and 73% of women were currently married. A third of the study population were urban residents and a quarter of them were either overweight or obese. While 45% of males were users of some form of tobacco, the prevalence of tobacco use was only 6% among the females. Similarly, a significantly greater proportion of men (30%) reported consuming alcohol either almost every day, about once a week or less than once a week as compared to just 1% amongst women.

### **Prevalence of hypertension at national, state and district level**

Table2 shows crude and age adjusted prevalence of hypertension amongst persons aged 15-49 years for the year 2015-16. The data shows that the age-adjusted prevalence of hypertension in India was 11.3% and the prevalence was 4 percentage points higher amongst males (13.8%) as compared to females (10.9%). Persons in the urban location (12.5%) had a marginally higher prevalence than persons in rural location-(10.6%).

The results reveal that the age-adjusted prevalence of hypertension varied greatly between states and UTs, with a prevalence of 8.2% in Kerala to a prevalence of 20.2% in Sikkim (See figures 1 and S1). Quite intriguingly, the hypertension prevalence was greatest among the north-eastern states-Sikkim (20.3%), Nagaland (17.6%), Assam (17.6%), Arunachal Pradesh (16.6%) and Tripura (15.4%). Hypertension prevalence was also very high in the following non-northeastern states-Jammu and Kashmir (15.8%), Punjab (14.8%), Himachal Pradesh (14.8%) and Telangana (14.2%). On the other hand, proportion of population suffering from hypertension was relatively low in states such as Kerala (8.2%), Bihar (8.8%), Delhi (8.6%), Rajasthan (9.1%), Uttar Pradesh (9.6%) and Jharkhand (9.6%).

Table 1. Characteristics of sample population by gender, National Family Health Survey, India, 2015-16

| Sample Characteristics     | Total          |            | Female         |            | Male           |            |
|----------------------------|----------------|------------|----------------|------------|----------------|------------|
|                            | N              | %          | N              | %          | N              | %          |
| <b>Hypertension</b>        |                |            |                |            |                |            |
| No                         | 693,875        | 85.5       | 602,609        | 86.1       | 91,266         | 81.7       |
| Yes                        | 85,774         | 10.6       | 69,889         | 10.0       | 15,885         | 14.2       |
| No response                | 32,268         | 4.0        | 27,765         | 4.0        | 4,503          | 4.0        |
| <b>Age group</b>           |                |            |                |            |                |            |
| 15-19                      | 144,277        | 17.8       | 125,282        | 17.9       | 18,995         | 17.0       |
| 20-29                      | 272,054        | 33.5       | 239,307        | 34.2       | 32,747         | 29.3       |
| 30-39                      | 215,796        | 26.6       | 187,459        | 26.8       | 28,337         | 25.4       |
| 40-49                      | 171,285        | 21.1       | 148,215        | 21.2       | 23,070         | 20.7       |
| <b>Marital Status</b>      |                |            |                |            |                |            |
| Not married                | 210,107        | 25.9       | 170,691        | 24.4       | 39,416         | 35.3       |
| Married                    | 572,676        | 70.5       | 502,074        | 71.7       | 70,602         | 63.2       |
| Widow/separated/divorced   | 29,134         | 3.6        | 27,498         | 3.9        | 1,636          | 1.5        |
| <b>Caste</b>               |                |            |                |            |                |            |
| Others                     | 165,234        | 20.4       | 142,244        | 20.3       | 22,990         | 20.6       |
| SC                         | 146,969        | 18.1       | 126,804        | 18.1       | 20,165         | 18.1       |
| ST                         | 147,737        | 18.2       | 127,661        | 18.2       | 20,076         | 18.0       |
| OBC                        | 314,661        | 38.8       | 271,733        | 38.8       | 42,928         | 38.5       |
| No response                | 37,316         | 4.6        | 31,821         | 4.5        | 5,495          | 4.9        |
| <b>Education</b>           |                |            |                |            |                |            |
| No education               | 204,922        | 25.2       | 190,537        | 27.2       | 14,385         | 12.9       |
| Primary                    | 109,102        | 13.4       | 94,563         | 13.5       | 14,539         | 13.0       |
| Secondary                  | 401,720        | 49.5       | 336,381        | 48.0       | 65,339         | 58.5       |
| Higher                     | 96,173         | 11.8       | 78,782         | 11.3       | 17,391         | 15.6       |
| <b>Place of residence</b>  |                |            |                |            |                |            |
| Urban                      | 237,105        | 29.2       | 202,358        | 28.9       | 34,747         | 31.1       |
| Rural                      | 574,812        | 70.8       | 497,905        | 71.1       | 76,907         | 68.9       |
| <b>Wealth quintile</b>     |                |            |                |            |                |            |
| poorest                    | 152,942        | 18.8       | 134,330        | 19.2       | 18,612         | 16.7       |
| poorer                     | 173,813        | 21.4       | 150,489        | 21.5       | 23,324         | 20.9       |
| middle                     | 171,866        | 21.2       | 147,612        | 21.1       | 24,254         | 21.7       |
| richer                     | 161,338        | 19.9       | 138,213        | 19.7       | 23,125         | 20.7       |
| richest                    | 151,958        | 18.7       | 129,619        | 18.5       | 22,339         | 20.0       |
| <b>BMI</b>                 |                |            |                |            |                |            |
| Normal (18.5-24.9)         | 488,801        | 60.2       | 418,369        | 59.7       | 70,432         | 63.1       |
| Overweight (25.0-29.9)     | 114,970        | 14.2       | 98,306         | 14.0       | 16,664         | 14.9       |
| Obese ( $\geq 30$ )        | 32,523         | 4.0        | 29,516         | 4.2        | 3,007          | 2.7        |
| No Response                | 175,623        | 21.6       | 154,072        | 22.0       | 21,551         | 19.3       |
| <b>Tobacco use</b>         |                |            |                |            |                |            |
| No                         | 670,194        | 82.5       | 615,197        | 87.9       | 54,997         | 49.3       |
| Yes                        | 126,050        | 15.5       | 72,226         | 10.3       | 53,824         | 48.2       |
| No Response                | 15,673         | 1.9        | 12,840         | 1.8        | 2,833          | 2.5        |
| <b>Alcohol consumption</b> |                |            |                |            |                |            |
| never drinks               | 744,838        | 91.7       | 670,364        | 95.7       | 74,474         | 66.7       |
| almost every day           | 6,898          | 0.8        | 2,172          | 0.3        | 4,726          | 4.2        |
| About once a week          | 20,939         | 2.6        | 6,674          | 1.0        | 14,265         | 12.8       |
| Less than once a week      | 23,569         | 2.9        | 8,213          | 1.2        | 15,356         | 13.8       |
| No Response                | 15,673         | 1.9        | 12,840         | 1.8        | 2,833          | 2.5        |
| <b>Total</b>               | <b>811,917</b> | <b>100</b> | <b>700,263</b> | <b>100</b> | <b>111,654</b> | <b>100</b> |

1  
2  
3  
4  
5  
6 Figure 2 shows inter-district variation in hypertension prevalence. The proportion of hypertensive  
7 population varied tremendously, ranging between 3.5% in district Mahoba, Uttar Pradesh and  
8 34.7% in district Dibang Valley, Arunachal Pradesh. A majority of districts across India recorded  
9 a high hypertension burden, with more than one-tenth of the persons aged 15-49 hypertensive in  
10 427 districts. Only 10 districts had hypertension levels below 5% and all of them except one were  
11 in EAG states. Several districts with alarmingly high prevalence of hypertension were clustered  
12 across north-eastern states. Five districts in Arunachal Pradesh, two districts in Punjab, one each  
13 in Sikkim, Assam and Andaman and Nicobar were among the top ten districts with the highest  
14 levels of hypertension. The results revealed that at least one in every five persons aged between  
15 15 and 49 were having hypertension in as many as 28 districts across India.

16  
17  
18  
19  
20  
21  
22  
23 The findings highlighted that the prevalence of hypertension was higher in men than in women in  
24 most states and UTs, except in Delhi, West Bengal, Meghalaya and Jammu and Kashmir J & K  
25 (Figure S2). The sex difference in prevalence of hypertension was highest in Andaman and  
26 Nicobar Islands (12.4%), followed by Sikkim (8.4%), Himachal Pradesh (7.3%) and Manipur  
27 (7.2%). The results also suggest that, in general, the gender differentials were relatively smaller in  
28 low prevalence states than in high prevalence states. Figure 3 shows the weighted prevalence of  
29 hypertension in rural and urban areas of all states. As shown in the above figure, the prevalence  
30 rate of hypertension was found to be higher in urban than in rural areas for most of the states.  
31 However, there were a few exceptions. The prevalence of hypertension was relatively higher  
32 amongst the rural folks than their urban counterparts in Punjab, Goa and Kerala. Another  
33 interesting pattern emerges while comparing the prevalence of hypertension between high and low  
34 SES categories within rural and urban areas of each of these states (Figure S3). The results suggest  
35 hypertension is no longer a disease of the rich. In fact, the distribution of the condition is changing,  
36 disproportionately affecting the economically disadvantaged in urban areas of states such as  
37 Punjab, Haryana, Jammu and Kashmir and most of the NE states. Furthermore, the phenomenon  
38 of higher prevalence of hypertension among the poor appears to be not limited to only urban areas.  
39 In rural areas of Chhattisgarh, Kerala and Mizoram, poorer individuals had higher prevalence than  
40 their richer counterparts.  
41  
42  
43  
44  
45  
46  
47  
48  
49  
50  
51  
52  
53  
54  
55  
56  
57  
58  
59  
60



Table 2. Prevalence of hypertension in India, 2015-2016

| Prevalence | Unadjusted  |                       | Adjusted    |                       |
|------------|-------------|-----------------------|-------------|-----------------------|
|            | %           | C.I.                  | %           | C.I.                  |
| Overall    | <b>10.5</b> | <b>(10.37, 10.62)</b> | <b>11.3</b> | <b>(11.16, 11.43)</b> |
| Male       | 14.3        | (13.97, 14.70)        | 13.8        | (13.46, 14.19)        |
| Female     | 10.1        | (09.96, 10.22)        | 10.9        | (10.79, 11.06)        |
| Rural      | 9.8         | (9.09, 9.94)          | 10.6        | (10.50, 10.78)        |
| Urban      | 11.8        | (11.12, 12.12)        | 12.5        | (12.25, 12.80)        |

Also, the differences in prevalence of hypertension by low vs high SES categories were generally marginal in urban areas of most states (<2 percentage points). The weak association between GDP per capita of states and hypertension prevalence (Figure S4) is also the confirmation of the growing convergence of rich-poor difference in prevalence of hypertension, particularly in the urban areas.

### Sociodemographic differentials in prevalence

The bi-variate and multivariate analyses were carried out to understand the relative importance of socioeconomic and behavioural risk factors of hypertension. Since the bi-variate and multivariate analyses yielded very similar results, we are only presenting the findings of multivariate analysis here. Table 3 shows results for multilevel logistic regression of hypertension by its different covariates. Expectedly, age was found to be an important predictor of hypertension. The likelihood of being hypertensive increased significantly with age. Odds Ratios suggest that older persons (45-49 years) were 6.7 times more likely to have hypertension than the younger individuals (15-19 years). The differences in prevalence probabilities between married, widowed and single were statistically significant. Those who were widowed, separated and divorced were more likely to have hypertension than their 'single' counterparts (OR=1.19;  $p<0.001$ ). Interestingly, married persons were also found to be at greater risk of hypertension than unmarried ones (OR=1.08;  $p<0.001$ ). Educational attainment seems to be inversely related with prevalence, though the effect of education was not significant among those who studied only up to primary level. But persons with secondary (OR=0.92;  $p<0.001$ ) or higher education (OR=0.81;  $p<0.001$ ) were less likely to be hypertensive as compared to their illiterate counterparts.

We also looked at how economic status, proxied by asset index influences the risk of hypertension in individuals. The ORs suggest a positive association between economic status and hypertension.



1  
2  
3 Compared with those in poorest quintile, people from richest quintile were having considerably  
4 higher likelihood of hypertension (0.21 percentage points). Place of residence was also found to  
5 be statistically significantly associated with hypertension. However, persons residing in rural areas  
6 (OR=0.96;  $p<0.01$ ) were marginally less likely to be at risk of hypertension than their urban folks.  
7  
8 Interestingly, caste differences in prevalence of hypertension were not much, except that persons  
9 belonging to OBC were less likely to have the condition (OR=0.96;  $p<0.001$ ) as compared to those  
10 from 'others'.  
11  
12  
13  
14  
15

16 We also examined the association between hypertension and health and life-style practices of the  
17 men and women. The ORs indicate that persons with overweight (OR=2.02;  $p<0.001$ ) or obesity  
18 issue (OR=3.22,  $p<0.001$ ) had significantly higher probability of hypertension than those with  
19 'normal' BMI. Alcohol consumption was found to be positively related with hypertension;  
20 however, no statistically significant association was found between tobacco use and hypertension.  
21 Those who drank alcohol almost every day (OR=1.45;  $p<0.000$ ), about once a week (OR=1.25;  
22  $p<0.001$ ) and less than once a week (OR=1.17;  $p<0.001$ ) were significantly more likely to suffer  
23 from hypertension than individuals without alcohol use habit.  
24  
25  
26  
27  
28  
29

30 We have explored the regional and sub-regional disparities in the prevalence of hypertension in  
31 India. Median odds ratio, MOR, indicates geographical heterogeneity in the prevalence of  
32 hypertension across India. Overall, the variation in the prevalence of hypertension was of greater  
33 magnitude at the district level (MOR= 1.32;  $p<0.001$ ) than at the state level (MOR= 1.28;  
34  $p<0.001$ ). While the MOR was 1.28 and 1.32, ORs for most individual level characteristics were  
35 relatively higher, suggesting that unexplained between-district and between-state variations are  
36 not as relevant as individual level characteristics for understanding the prevalence of hypertension.  
37  
38  
39  
40  
41  
42  
43  
44  
45  
46  
47  
48  
49  
50  
51  
52  
53  
54  
55  
56  
57  
58  
59  
60

**Table 3. Results of multilevel logistic regression on hypertension, India, 2015-16**

|                            |                          | Odds Ratio | P value | 95% CI       |
|----------------------------|--------------------------|------------|---------|--------------|
| <b>Age group</b>           | 15-19                    | 1          |         |              |
|                            | 20-29                    | 1.86       | 0.000   | (1.77, 1.96) |
|                            | 30-39                    | 3.80       | 0.000   | (3.60, 4.01) |
|                            | 40-49                    | 6.71       | 0.000   | (6.36, 7.09) |
| <b>Marital Status</b>      | Unmarried                | 1          |         |              |
|                            | Married                  | 1.08       | 0.000   | (1.04, 1.12) |
|                            | Widow/separated/divorced | 1.19       | 0.000   | (1.13, 1.25) |
| <b>Caste</b>               | Others                   | 1          |         |              |
|                            | SC                       | 0.98       | 0.214   | (0.96, 1.01) |
|                            | ST                       | 1.02       | 0.312   | (0.98, 1.06) |
|                            | OBC                      | 0.96       | 0.001   | (0.94, 0.98) |
| <b>Education</b>           | No education             | 1          |         |              |
|                            | Primary                  | 1.00       | 0.914   | (0.97, 1.03) |
|                            | Secondary                | 0.92       | 0.000   | (0.90, 0.94) |
|                            | Higher                   | 0.81       | 0.000   | (0.78, 0.84) |
| <b>Place of residence</b>  | Urban                    |            |         |              |
|                            | Rural                    | 0.96       | 0.001   | (0.94, 0.98) |
| <b>Wealth Status</b>       | Poorest                  | 1          |         |              |
|                            | Poorer                   | 1.08       | 0.000   | (1.04, 1.11) |
|                            | Middle                   | 1.13       | 0.000   | (1.09, 1.16) |
|                            | Richer                   | 1.22       | 0.000   | (1.18, 1.26) |
|                            | Richest                  | 1.21       | 0.000   | (1.17, 1.26) |
| <b>BMI</b>                 | Normal                   | 1          |         |              |
|                            | Overweight (25.0-29.9)   | 2.02       | 0.000   | (1.98, 2.06) |
|                            | Obese ( $\geq 30$ )      | 3.22       | 0.000   | (3.13, 3.32) |
| <b>Tobacco use</b>         | No                       |            |         |              |
|                            | Yes                      | 1.01       | 0.395   | (0.99, 1.04) |
| <b>Alcohol consumption</b> | Never drinks             | 1          | 1       |              |
|                            | almost every day         | 1.45       | 0.000   | (1.34, 1.56) |
|                            | About once a week        | 1.25       | 0.000   | (1.19, 1.31) |
|                            | Less than once a week    | 1.17       | 0.000   | (1.11, 1.22) |
| <b>Random Effect Part</b>  |                          |            |         |              |
| Variance (SE)#             | State                    | 0.066      | 0.000   | (0.04, 0.11) |
|                            | District                 | 0.084      | 0.000   | (0.07, 0.09) |
| Median Odds Ratio (MOR)    | State                    | 1.28       |         |              |
|                            | District                 | 1.32       |         |              |

Note. # variance expressed in standard error

## Discussion

This article provides estimates on the prevalence of hypertension across different geographical areas in India and examines socioeconomic and life-style factors associated with this condition, by exploiting the latest data from the 4<sup>th</sup> round (2015-16) of NFHS. Although some previous research have attempted to understand the burden of hypertension in India [9, 11, 12], to the best of our knowledge, this study is the first comprehensive assessment of hypertension prevalence using high quality survey data of each state and district of India.

One of our key findings is that more than 11% of the population age 15-49 in India are hypertensive. However, our estimate on the age-adjusted hypertension prevalence differ considerably from the reported crude prevalence (25%) in Geldsetzer et al's (2018) study on hypertension. This is arising partly because of the reason that our estimates of prevalence pertain to those aged 15-49 years while the said study provided estimates for adults aged 18 and above. Besides the differences in age composition between two samples, their estimates can not be generalised nationally as several states and UTs were not covered in Annual Health Survey (AHS) and District Level Household Survey (DLHS) surveys, which were used for assessing hypertension prevalence in Geldsetzer et al's study. Furthermore, it should be noted while the clinical and anthropometric data for AHS were collected in 2014<sup>2</sup>, DLHS was carried out between 2012 and 2013. Hence, the pooled data may not provide true estimates of hypertension at the national level owing to inconsistencies between two surveys in terms of survey design, period of data collection (time gap) and non-inclusion of many states and UTs.

Hypertension was found to be more prevalent among males than among females. Although the prevalence of hypertension was relatively higher in urban than in rural areas at the national level, the rural-urban differences were not large, implying that hypertension epidemic is spreading very fast even in the rural population. This has serious implications for the rural people. The public health system through PHCs in rural areas is still focusing on infectious diseases, reproductive and child health and thus, has become too limited. So, people would have to rely on the private sector

---

<sup>2</sup> Although AHS was conducted during 2013-2014, the biomarker component i.e., CAB data were collected only from a sub-sample of AHS in the year 2014. For details, see <http://www.censusindia.gov.in/2011census/hh-series/HH-2/CAB-Introduction.pdf>. In contrast, in DLHS, CAB tests were carried out in all selected households.

1  
2  
3 for the management of hypertension and its associated diseases, which would substantially add to  
4 their financial strain.  
5

6  
7 Considerable inter-state and inter-district differences were found in the prevalence of  
8 hypertension. It was more common in north-eastern states, Jammu & Kashmir, Himachal Pradesh,  
9 Punjab, and Telengana than in Kerala and EAG states. The inter-state differentials might have  
10 been caused by the differences in risk exposure such as rising affluence, urbanization, sedentary  
11 life style, changing dietary habits, obesity prevalence, social stress and possibly, genetic factors.  
12 The finding of relatively lower hypertension prevalence in EAG states is consistent with evidence  
13 from the latest burden of disease study that classified these states as having low epidemiological  
14 transition level [13]. But surprisingly, Kerala, where epidemiologic transition is most advanced  
15 among all states, had recorded the lowest prevalence of hypertension. This may be due to the non-  
16 inclusion of older persons in NFHS. It should be noted that Kerala has the highest proportion of  
17 elderly population (13%) in India. However, more research is needed to pinpoint the reasons for  
18 low prevalence in Kerala. Interestingly, in north-eastern states, despite their low per capita income,  
19 the prevalence was way higher than states with much higher level of socioeconomic development.  
20 The higher burden of hypertension amongst the population of north-east could be attributed to  
21 ethnicity and food habits. Hypertension has emerged as a major epidemic in many districts.  
22 Examples being two districts of Arunachal Pradesh, where every third person was hypertensive  
23 and more than a fifth of the population had the condition in as many as 28 districts.  
24  
25

26  
27 In majority of the states, hypertension prevalence was higher in urban than in rural areas, though  
28 the difference was small and at times, insignificant. However, in Goa, Punjab, Kerala and  
29 Nagaland, higher prevalence of hypertension was seen among rural people as compared to their  
30 urban counterparts. Such narrowing differentials may be the result of the factors mentioned in a  
31 recent study conducted in Punjab. Tripathy and others (2016) reported that there was no rural-  
32 urban differential in terms of dietary practices and prevalence of overweight and obesity barring  
33 the fact that a markedly higher proportion of individuals from rural areas always/often add salt  
34 before/when eating as compared to those from urban areas [14].  
35  
36

37  
38 Another major finding was the weak link between economic growth (GDP per capita) and  
39 hypertension. Our study reveals that hypertension is affecting the people in poorer and not so poor  
40 states alike. Furthermore, hypertension is not only affecting the affluent but is also widespread  
41  
42  
43  
44  
45  
46  
47  
48  
49  
50  
51

1  
2  
3 among the poor within states. Another salient finding is the increased proportion of poor suffering  
4 from hypertension in many states, particularly in the urban areas. This is in consonance with the  
5 findings from studies on non-communicable diseases [15]. These findings paint a disturbing trend,  
6 indicating that it is just a matter of time when the less affluent segment of the population in other  
7 states would also face a disproportionately higher burden of hypertension. This situation might  
8 have arisen due to factors such as the diffusion and adoption of 'modern' lifestyles (the changing  
9 dietary behaviour: smoking, drinking, unhealthy diets) across population groups (which is a result  
10 of urbanisation, aggressive push of junk food through advertising and marketing and related shifts  
11 in sociocultural practice), physical inactivity and high levels of depression and stress (linked to  
12 poverty and lack of equal opportunities) [16, 17].

21 Our study also corroborates the above observations as the evidences point to urban residence,  
22 obesity, and alcohol use as some of the key drivers of the hypertension epidemic in India. These  
23 were also supported by previous research in India [12, 14, 18]. Surprisingly, use of tobacco was  
24 not found to increase the risk of hypertension. While it is difficult to explain why use of tobacco  
25 did not display statistically significant association with hypertension, one plausible reason could  
26 be the young population of our sample. According to a recent study which examined the life-course  
27 impact of smoking on hypertension, found no statistically significant relationship between  
28 smoking and the risk of hypertension in the age-group younger than 35; though smoking was found  
29 to be significantly associated with hypertension in the later ages[19].

37 Our study has several notable strengths. This is the first study that used the recently released NFHS  
38 data, which is based on a sample of households that is representative at the national, state and  
39 district levels, thereby, allowing us to provide estimates of the prevalence of hypertension across  
40 administrative regions. Further, multivariate analysis identified the key drivers of hypertension in  
41 India.

46 Aside from the above mentioned strengths, the study has a few limitations, which merit discussion.  
47 The findings of this study are limited to the persons aged between 15 and 49 in India. Further,  
48 NFHS provides cross-sectional data. This prevents exploration of causal pathways underlying the  
49 reported associations. We could not investigate the role of behavioural risk factors such as low  
50 fruit and vegetable intake and physical inactivity in this analysis due to the non-availability of such  
51 information in the dataset.

## Conclusion

To conclude, hypertension epidemic is spreading alarmingly in India across rural and urban populations. Disturbingly, the hypertension prevalence is now becoming more concentrated among the poor in both urban and rural areas. This phenomenon of rising hypertension prevalence among the least resourceful people has serious social and economic implications for the country and warrants immediate policy interventions to prevent the catastrophe. The district wise estimates on this condition should be used to plan for localised interventions so that the prevalence could be brought down significantly, which would help achieve the national target of 25% relative reduction in the prevalence of hypertension by 2025 [20]. We recommend universal blood pressure screening for high prevalence districts to track the progress of interventions. However, when it comes to interventions, the emphasis should be on primary prevention of hypertension. Policy measures should be taken to improve hazardous working conditions of the poor and growing social pressures of survival responsible for 'life-style' changes such as consumption of high calorie food and alcohol. On the other hand, a diet rich in fruits and vegetables, regular physical activity and weight control should be promoted.

## Contributorship statement

While SG conceptualised the paper, partly analysed the data and wrote the manuscript, MK carried out the analysis of the data. Both SG and MK participated in editing of the paper. The authors discussed the results and approved the revision of the final manuscript.

## Funding

Authors did not receive any funding for conducting this research.

## Data sharing statement

The data used in this study came from the large scale surveys conducted by government agencies. All data are already in the public domain and can be accessed freely from the Government of India's data sharing portals. Besides, NFHS data can also be obtained from the following website- [www.iipsindia.org](http://www.iipsindia.org).

## Conflicts of interest

The authors have none to declare.

## Reference

1. Registrar General of India Report on Medical Certification of Cause of Death 2013, Office of the Registrar General, New Delhi, India 2015. Available at: [www.censusindia.gov.in/2011-document/mccd\\_2013.pdf](http://www.censusindia.gov.in/2011-document/mccd_2013.pdf)
2. Forouzanfar MH, Liu P, Roth GA, *et al* Global Burden of Hypertension and Systolic Blood Pressure of at Least 110 to 115 mm Hg, 1990-2015. *JAMA*. 2017; 317(2):165–182. doi:10.1001/jama.2016.19043
3. Qadeer I Health care systems in transition III. India, Part I. The Indian Experience, *Journal of Public Health Medicine*, 2000, vol.22 (pg. 25-32)
4. Dev MS and Ranade A. Rising food prices and rural poverty: going beyond co-relations. *Economic and Political Weekly*, 1998, 33: 2529-2536.
5. Roy A, Praveen PA, Amarchand R, *et al* Changes in hypertension prevalence, awareness, treatment and control rates over 20 years in National Capital Region of India: results from a repeat cross-sectional study. *BMJ Open* 2017;7:e015639. doi:10.1136/bmjopen-2016-015639
6. Devi, P., Rao, M., Sigamani, A., Faruqui, A., Jose, M., Gupta, R., ... Xavier, D. (2012). Prevalence, risk factors and awareness of hypertension in India: a systematic review. *Journal Of Human Hypertension*, 27, 281. Retrieved from <https://doi.org/10.1038/jhh.2012.33>
7. Agrawal VK, Bhalwar R, Basannar DR. Prevalence and Determinants of Hypertension in a Rural Community. *Med J Armed Forces India*. 2008;64(1):21–25. doi:10.1016/S0377-1237(08)80139-6
8. Gupta PC, Gupta R, Pednekar MS. Hypertension prevalence and blood pressure trends in 88 653 subjects in Mumbai, India. *Journal of Human Hypertension*. 2004;18: 907–10.
9. Anchala R, Kannuri NK, Pant H, Khan H, Franco OH, Di Angelantonio E, Prabhakaran D (2014). Hypertension in India: a systematic review and meta-analysis of prevalence, awareness, and control of hypertension. *J Hypertens*. 2014 Jun; 32(6):1170-7.
10. Pickering TG, Hall JE, Appel LJ, Falkner BE, Graves J, Hill MN, Jones DW, Kurtz T, Sheps SG, Roccella EJ: Recommendations for Blood Pressure Measurement in Humans and Experimental Animals: Part 1: Blood Pressure Measurement in Humans: A Statement for Professionals From the Subcommittee of Professional and Public Education of the American Heart Association Council on High Blood Pressure Research. *Hypertens*. 2005, 45: 142-161



11. Geldsetzer P, Manne-Goehler J, Theilmann M, et al. Diabetes and Hypertension in India: A Nationally Representative Study of 1.3 Million Adults. *JAMA Intern Med.* 2018;178(3):363–372. doi:10.1001/jamainternmed.2017.8094
12. Bhansali A, Dhandania VK, Deepa M, Anjana RM, Joshi SR, Joshi PP, Madhu SV, Rao PV, Subashini R, Sudha V, Unnikrishnan R, Das AK, Shukla DK, Kaur T, Mohan V, Pradeepa R (2015). Prevalence of and risk factors for hypertension in urban and rural India: the ICMR-INDIAB study. *J Hum Hypertens*, 29(3):204-9.
13. Dandona L, Dandona R, Kumar GA, Shukla DK, Paul VK, Balakrishnan K, et al. Nations within a nation: variations in epidemiological transition across the states of [India](#), 1990–2016 in the Global Burden of Disease Study. *The Lancet.* 2017; 390(10111):2437–60.
14. Tripathy JP, Thakur JS, Jeet G, Chawla S, Jain S. Alarming high prevalence of hypertension and pre-hypertension in North India—results from a large cross-sectional STEPS survey. Li Y, ed. *PLoS ONE.* 2017;12(12):e0188619. doi:10.1371/journal.pone.0188619.
15. Anjana RM, Pradeepa R, Deepa M, Datta M, Sudha V, Unnikrishnan R, et al. Prevalence of diabetes and prediabetes (impaired fasting glucose and/or impaired glucose tolerance) in urban and rural India: phase I results of the Indian Council of Medical Research-India DIABetes (ICMR-INDIAB) study. *Diabetologia.* 2011;54(12):3022–7.
16. Hawkes C. Uneven dietary development: linking the policies and processes of globalization with the nutrition transition, obesity and diet-related chronic diseases. *Global Health.* 2006;2:4. Published 2006 Mar 28. doi:10.1186/1744-8603-2-4
17. Warren Smit, Ariane deLannoy, Robert V.H. Dover, Estelle Lambert, Naomi Levitt, Vanessa Watson. Making unhealthy places: The built environment and non-communicable diseases in Khayelitsha, Cape Town, *Health & Place*, Volume 39, 2016, pp. 196-203
18. Prabhdeep Kaur, Sudha Ramachandra Rao, Ezhil Radhakrishnan. Prevalence, awareness, treatment, control and risk factors for hypertension in a rural population in South India, *International Journal of Public Health*, 2012, Volume 57, Number 1, Page 87
19. Devi, P., Rao, M., Sigamani, A., Faruqui, A., Jose, M., Gupta, R., ... Xavier, D. (2012). Prevalence, risk factors and awareness of hypertension in India: a systematic review. *Journal Of Human Hypertension*, 27, 281. Retrieved from <https://doi.org/10.1038/jhh.2012.33>
20. Ministry of Health and Family Welfare (2013). National Action Plan and Monitoring Framework for Prevention and Control of NCDs, New Delhi. Accessed at [https://www.iccp-portal.org/system/files/plans/India%20%20National\\_Action\\_Plan\\_and\\_Monitoring\\_Framework\\_Prevention\\_NCD\\_2013.pdf](https://www.iccp-portal.org/system/files/plans/India%20%20National_Action_Plan_and_Monitoring_Framework_Prevention_NCD_2013.pdf)



1  
2  
3  
4  
5  
6  
7  
8  
9  
10  
11  
12  
13  
14  
15  
16  
17  
18  
19  
20  
21  
22  
23  
24  
25  
26  
27  
28  
29  
30  
31  
32  
33  
34  
35  
36  
37  
38  
39  
40  
41  
42  
43  
44  
45  
46  
47  
48  
49  
50  
51  
52  
53  
54  
55  
56  
57  
58  
59  
60

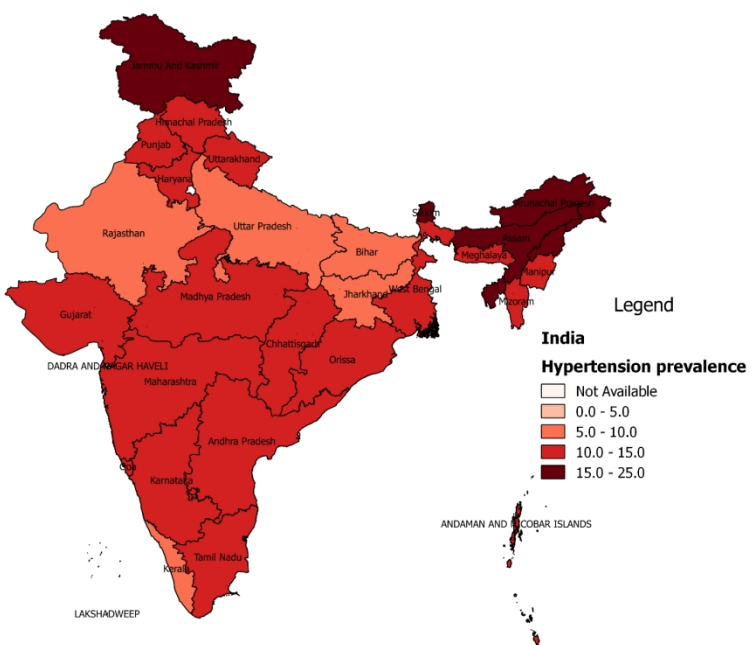

Fig 1. Prevalence of hypertension across states, India, 2015-16  
228x161mm (220 x 220 DPI)

1  
2  
3  
4  
5  
6  
7  
8  
9  
10  
11  
12  
13  
14  
15  
16  
17  
18  
19  
20  
21  
22  
23  
24  
25  
26  
27  
28  
29  
30  
31  
32  
33  
34  
35  
36  
37  
38  
39  
40  
41  
42  
43  
44  
45  
46  
47  
48  
49  
50  
51  
52  
53  
54  
55  
56  
57  
58  
59  
60

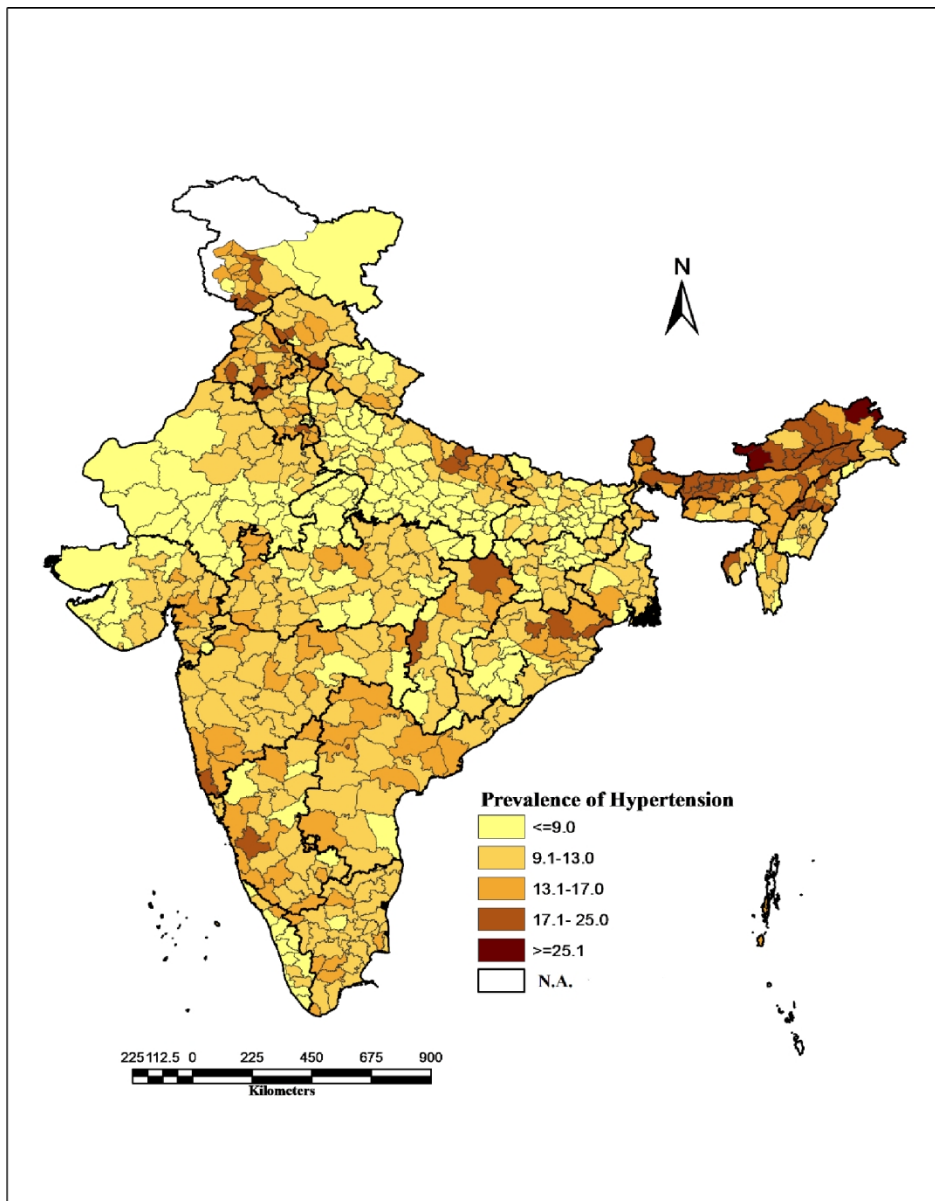

Figure2. Prevalence of hypertension across districts, India, 2015-16

145x185mm (300 x 300 DPI)

1  
2  
3  
4  
5  
6  
7  
8  
9  
10  
11  
12  
13  
14  
15  
16  
17  
18  
19  
20  
21  
22  
23  
24  
25  
26  
27  
28  
29  
30  
31  
32  
33  
34  
35  
36  
37  
38  
39  
40  
41  
42  
43  
44  
45  
46  
47  
48  
49  
50  
51  
52  
53  
54  
55  
56  
57  
58  
59  
60

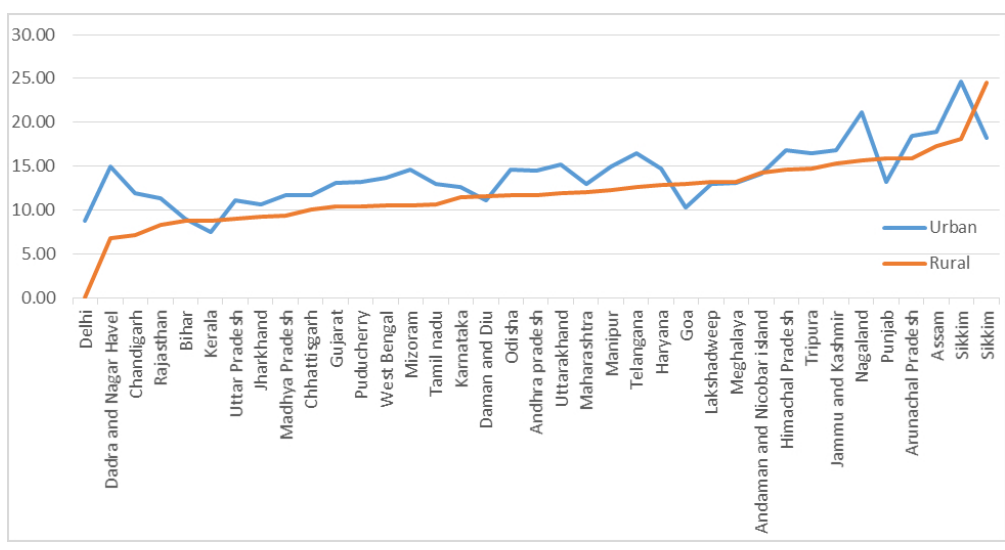

Figure3. Prevalence of hypertension by sector across selected states, 2015-16

165x87mm (150 x 150 DPI)

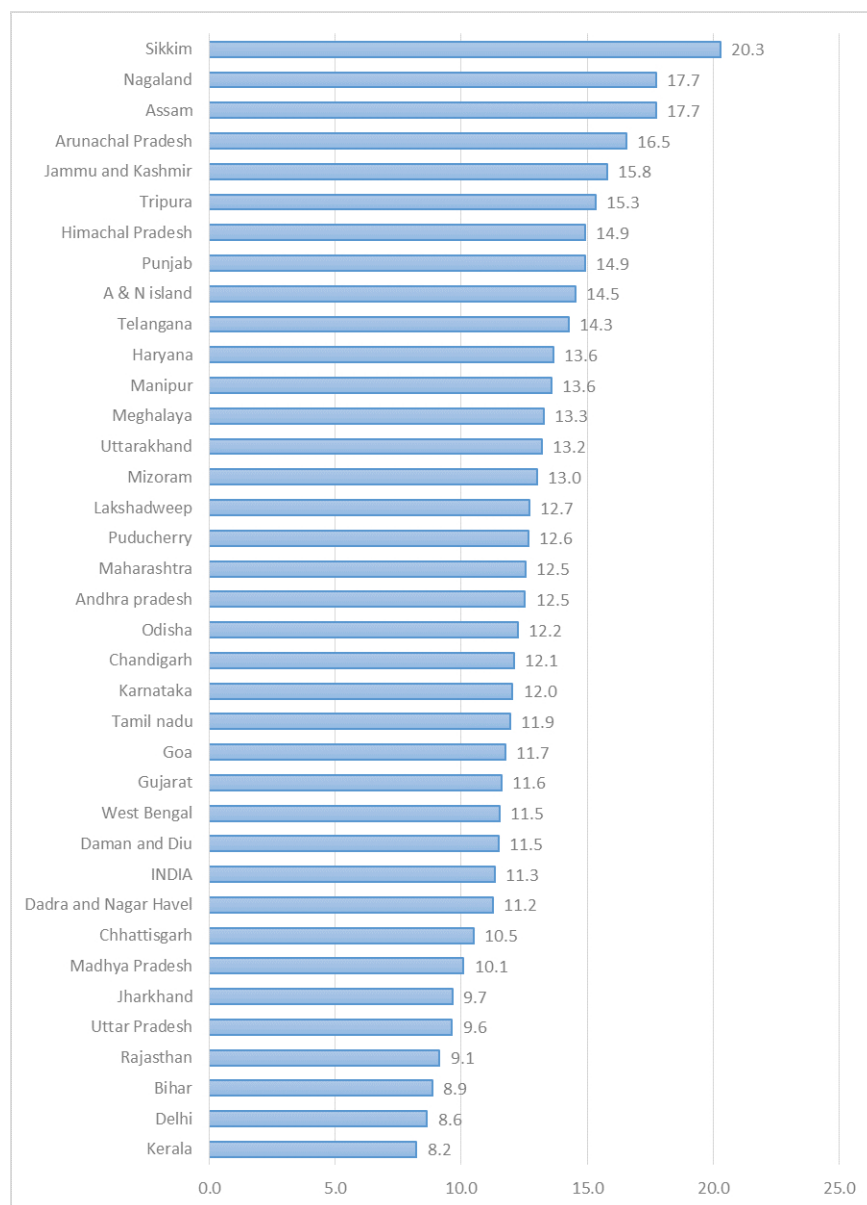

153x211mm (150 x 150 DPI)

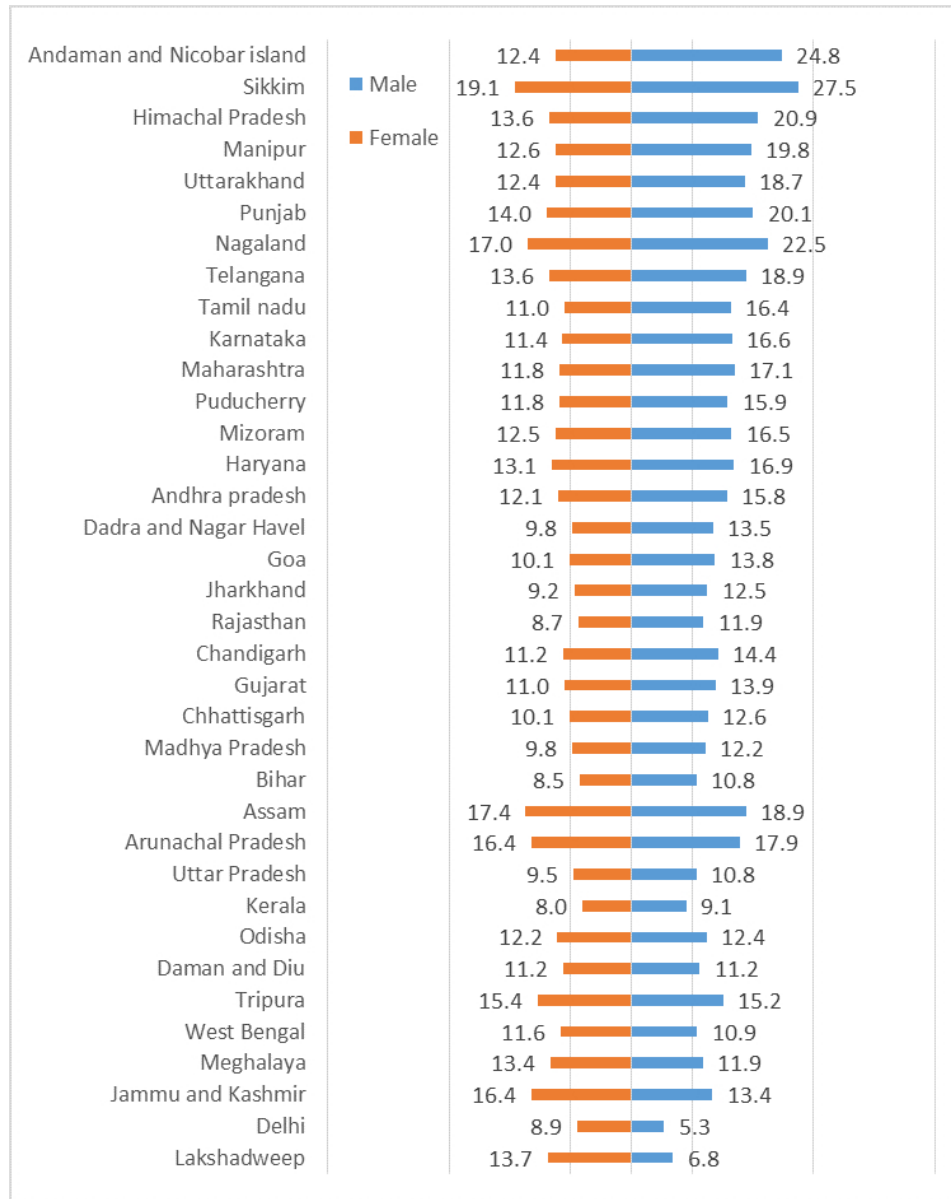

127x159mm (150 x 150 DPI)

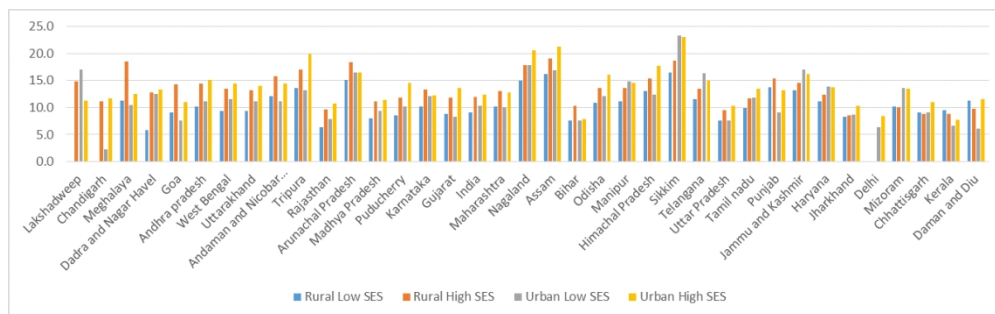

228x71mm (150 x 150 DPI)

1  
2  
3  
4  
5  
6  
7  
8  
9  
10  
11  
12  
13  
14  
15  
16  
17  
18  
19  
20  
21  
22  
23  
24  
25  
26  
27  
28  
29  
30  
31  
32  
33  
34  
35  
36  
37  
38  
39  
40  
41  
42  
43  
44  
45  
46  
47  
48  
49  
50  
51  
52  
53  
54  
55  
56  
57  
58  
59  
60

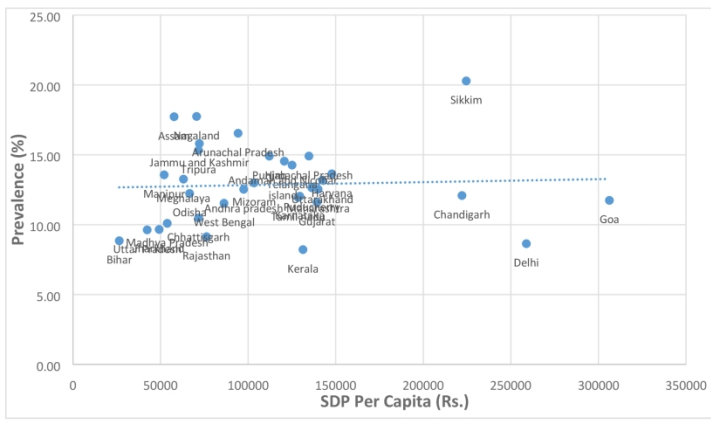

Note: The source of GDP data is Central Statistics Office, Ministry of Statistics and Programme Implementation, Government of India

215x279mm (300 x 300 DPI)

**STROBE 2007 (v4) Statement—Checklist of items that should be included in reports of *cross-sectional studies***

| Section/Topic                | Item # | Recommendation                                                                                                                                                                       | Reported on page # |
|------------------------------|--------|--------------------------------------------------------------------------------------------------------------------------------------------------------------------------------------|--------------------|
| <b>Title and abstract</b>    | 1      | (a) Indicate the study's design with a commonly used term in the title or the abstract                                                                                               | 2                  |
|                              |        | (b) Provide in the abstract an informative and balanced summary of what was done and what was found                                                                                  | 2                  |
| <b>Introduction</b>          |        |                                                                                                                                                                                      |                    |
| Background/rationale         | 2      | Explain the scientific background and rationale for the investigation being reported                                                                                                 | 4                  |
| Objectives                   | 3      | State specific objectives, including any prespecified hypotheses                                                                                                                     | 5                  |
| <b>Methods</b>               |        |                                                                                                                                                                                      |                    |
| Study design                 | 4      | Present key elements of study design early in the paper                                                                                                                              | 5                  |
| Setting                      | 5      | Describe the setting, locations, and relevant dates, including periods of recruitment, exposure, follow-up, and data collection                                                      | 5                  |
| Participants                 | 6      | (a) Give the eligibility criteria, and the sources and methods of selection of participants                                                                                          | 5                  |
| Variables                    | 7      | Clearly define all outcomes, exposures, predictors, potential confounders, and effect modifiers. Give diagnostic criteria, if applicable                                             | 5-6                |
| Data sources/<br>measurement | 8*     | For each variable of interest, give sources of data and details of methods of assessment (measurement). Describe comparability of assessment methods if there is more than one group | 6                  |
| Bias                         | 9      | Describe any efforts to address potential sources of bias                                                                                                                            | 6                  |
| Study size                   | 10     | Explain how the study size was arrived at                                                                                                                                            | 5                  |
| Quantitative variables       | 11     | Explain how quantitative variables were handled in the analyses. If applicable, describe which groupings were chosen and why                                                         | 6                  |
| Statistical methods          | 12     | (a) Describe all statistical methods, including those used to control for confounding                                                                                                | 6                  |
|                              |        | (b) Describe any methods used to examine subgroups and interactions                                                                                                                  | 6                  |
|                              |        | (c) Explain how missing data were addressed                                                                                                                                          | 6                  |
|                              |        | (d) If applicable, describe analytical methods taking account of sampling strategy                                                                                                   | 6                  |
|                              |        | (e) Describe any sensitivity analyses                                                                                                                                                |                    |
| <b>Results</b>               |        |                                                                                                                                                                                      |                    |



|                          |     |                                                                                                                                                                                                                                                                                                                                                                                                               |       |
|--------------------------|-----|---------------------------------------------------------------------------------------------------------------------------------------------------------------------------------------------------------------------------------------------------------------------------------------------------------------------------------------------------------------------------------------------------------------|-------|
| Participants             | 13* | (a) Report numbers of individuals at each stage of study—eg numbers potentially eligible, examined for eligibility, confirmed eligible, included in the study, completing follow-up, and analysed<br>(b) Give reasons for non-participation at each stage<br>(c) Consider use of a flow diagram                                                                                                               | 8     |
| Descriptive data         | 14* | (a) Give characteristics of study participants (eg demographic, clinical, social) and information on exposures and potential confounders<br>(b) Indicate number of participants with missing data for each variable of interest                                                                                                                                                                               | 8     |
| Outcome data             | 15* | Report numbers of outcome events or summary measures                                                                                                                                                                                                                                                                                                                                                          | 9     |
| Main results             | 16  | (a) Give unadjusted estimates and, if applicable, confounder-adjusted estimates and their precision (eg, 95% confidence interval). Make clear which confounders were adjusted for and why they were included<br>(b) Report category boundaries when continuous variables were categorized<br>(c) If relevant, consider translating estimates of relative risk into absolute risk for a meaningful time period | 9-12  |
| Other analyses           | 17  | Report other analyses done—eg analyses of subgroups and interactions, and sensitivity analyses                                                                                                                                                                                                                                                                                                                |       |
| <b>Discussion</b>        |     |                                                                                                                                                                                                                                                                                                                                                                                                               |       |
| Key results              | 18  | Summarise key results with reference to study objectives                                                                                                                                                                                                                                                                                                                                                      | 13-15 |
| Limitations              | 19  | Discuss limitations of the study, taking into account sources of potential bias or imprecision. Discuss both direction and magnitude of any potential bias                                                                                                                                                                                                                                                    | 15    |
| Interpretation           | 20  | Give a cautious overall interpretation of results considering objectives, limitations, multiplicity of analyses, results from similar studies, and other relevant evidence                                                                                                                                                                                                                                    | 16    |
| Generalisability         | 21  | Discuss the generalisability (external validity) of the study results                                                                                                                                                                                                                                                                                                                                         | 13    |
| <b>Other information</b> |     |                                                                                                                                                                                                                                                                                                                                                                                                               |       |
| Funding                  | 22  | Give the source of funding and the role of the funders for the present study and, if applicable, for the original study on which the present article is based                                                                                                                                                                                                                                                 | 1     |

\*Give information separately for cases and controls in case-control studies and, if applicable, for exposed and unexposed groups in cohort and cross-sectional studies.

**Note:** An Explanation and Elaboration article discusses each checklist item and gives methodological background and published examples of transparent reporting. The STROBE checklist is best used in conjunction with this article (freely available on the Web sites of PLoS Medicine at <http://www.plosmedicine.org/>, Annals of Internal Medicine at <http://www.annals.org/>, and Epidemiology at <http://www.epidem.com/>). Information on the STROBE Initiative is available at [www.strobe-statement.org](http://www.strobe-statement.org).

# BMJ Open

## Prevalence and associated risk factors of hypertension among persons aged 15-49 in India: a cross sectional study

|                                 |                                                                                                                                                                            |
|---------------------------------|----------------------------------------------------------------------------------------------------------------------------------------------------------------------------|
| Journal:                        | <i>BMJ Open</i>                                                                                                                                                            |
| Manuscript ID                   | bmjopen-2019-029714.R2                                                                                                                                                     |
| Article Type:                   | Original research                                                                                                                                                          |
| Date Submitted by the Author:   | 29-Oct-2019                                                                                                                                                                |
| Complete List of Authors:       | Ghosh, Soumitra; Tata Institute of Social Sciences, School of Health Systems Studies<br>Kumar, Manish; Tata Institute of Social Sciences, School of Health Systems Studies |
| <b>Primary Subject Heading</b>: | Epidemiology                                                                                                                                                               |
| Secondary Subject Heading:      | Public health, Health policy                                                                                                                                               |
| Keywords:                       | Hypertension < CARDIOLOGY, prevalence, Factors, India, District, state                                                                                                     |
|                                 |                                                                                                                                                                            |

SCHOLARONE™  
Manuscripts

1  
2  
3  
4  
5  
6  
7  
8  
9  
10  
11  
12  
13  
14  
15  
16  
17  
18  
19  
20  
21  
22  
23  
24  
25  
26  
27  
28  
29  
30  
31  
32  
33  
34  
35  
36  
37  
38  
39  
40  
41  
42  
43  
44  
45  
46  
47  
48  
49  
50  
51  
52  
53  
54  
55  
56  
57  
58  
59  
60

Full Title: **Prevalence and associated risk factors of hypertension among persons aged 15-49 in India: a cross sectional study**

**Authors:**

1. Soumitra Ghosh, PhD [Corresponding author]

Assistant Professor  
Centre for Health Policy, Planning and Management  
School of Health Systems Studies  
Tata Institute of Social Sciences (TISS)  
V.N.Purav Marg, Deonar  
Mumbai-88  
INDIA

Ph: +91-22-25525534;  
Fax: +91-22-25525050  
Email: [soumitraips@gmail.com](mailto:soumitraips@gmail.com); [soumitra@tiss.edu](mailto:soumitra@tiss.edu)  
URL: <https://www.tiss.edu/view/9/employee/soumitra/>  
<https://in.linkedin.com/in/soumitra-ghosh-1b343629>

2. Mr. Manish Kumar

Research Associate  
Tata Institute of Social Sciences (TISS)  
V.N.Purav Marg, Deonar  
Mumbai-88  
INDIA

Pin: 400088

Mobile: 9702511509

Email: [kumarmanishiips@gmail.com](mailto:kumarmanishiips@gmail.com)

**'Declarations of interest:** none'

**Financial disclosure statement:** We declare that we did not receive any specific funding from any source for this study.

# Prevalence and associated risk factors of hypertension among persons aged 15-49 in India: a cross-sectional study

## Abstract

**Objectives** This is the first attempt to provide estimates on the prevalence of hypertension at the national, state and district level, a prerequisite for designing effective interventions. Besides, the study aims to identify the risk factors of hypertension.

**Design** We analysed cross-sectional survey data from the 4<sup>th</sup> round (2015-16) of National Family Health Survey (NFHS). NFHS was conducted between January 2015 and December 2016, gathering information on a range of indicators including blood pressure. The age adjusted prevalence of hypertension was calculated for state comparison, while multilevel logistic regression analysis was done to assess the correlates of hypertension.

**Setting and participants** India (2015-16 n=811,917) aged 15-49 years.

**Primary and secondary outcome measures** The primary outcome is hypertension, which has been defined as systolic blood pressure (SBP)  $\geq 140$  mm Hg and/ or diastolic blood pressure (DBP)  $\geq 90$  mm Hg.

**Results** The age-adjusted prevalence of hypertension in India was 11.3% (95% CI 11.16 to 11.43) among persons aged between 15 and 49 years and was 4 percentage points higher amongst males-13.8% (95% CI 13.46 to 14.19) than among females-10.9% (95% CI 10.79 to 11.06). Persons in the urban location (12.5%, 95% CI 12.25 to 12.80) had a marginally higher prevalence than persons in rural location-(10.6%, 95% CI 10.50 to 10.78). The proportion of population suffering from hypertension varied greatly between states, with a prevalence of 8.2% (95% CI 7.58, 8.85) in Kerala to 20.3% (95% CI 18.81, 21.77) in Sikkim. Advancing age, obesity/overweight, male sex, socioeconomic status and consumption of alcohol were found to be the major predictors of hypertension.

**Conclusions** Hypertension prevalence is now becoming more concentrated amongst the poor. Policy measures should be taken to improve the hazardous working conditions and growing social pressures of survival responsible for 'life-style' changes such as consumption of high calorie food and alcohol.

**Key words:** Hypertension, prevalence, factors, state, district and India

## Article summary

### Strengths and limitations of the study

- First epidemiological study to provide estimates on prevalence of hypertension at national, state and district level
- Multivariate analysis identified the key drivers of hypertension
- The use of cross-sectional data that does not allow for exploration of causal pathways underlying the reported associations
- The role of behavioural risk factors such as low fruit and vegetable intake and physical inactivity could not be explored in this analysis
- Findings are limited to the persons aged between 15 and 49

## Introduction

Hypertension is the single largest contributor to the avoidable deaths and diseases in India. It is a leading risk factor for cardiovascular disease, which accounted for 23% of total deaths and 32% of adult deaths in 2010-2013[1]. India has committed to take an array of actions to meet the Sustainable Development Goals (SDG) target of reducing premature mortality from non-communicable diseases (NCDs) by one-third by 2030. However, much of the success in meeting this target hinges on its ability to check the rise of hypertension. The Global Burden of Hypertension study has highlighted that of the global burden of 212 million DALYs related to hypertension, 18% occurred in India in 2015[2]. The burden of hypertension in India is expected to rise considerably in the coming years due to rapid environmental and 'life-style' changes that emanate from hazardous working conditions and growing social pressures of survival [3, 4].

### *Monitoring and evaluation for SDG*

It is, therefore, imperative that blood pressure trends are monitored to evaluate the progress that the country makes vis-à-vis the SDG goal of reduction in NCD mortality. To do that, data on hypertension is needed so that stakeholders can design appropriate interventions and evaluate national programmes aimed at effectively addressing hypertension and associated NCDs. But there was a paucity of reliable information on the status of hypertension in India. As a result, to assess the magnitude of this problem, policy makers had to rely on community studies or surveys that provided self-reported data on hypertension [5, 6, 7, 8]. Further, data from small studies were extrapolated to obtain national level estimate on hypertension [9]. Although these studies were helpful and used as a key resource in the arsenal of health policy makers, in the absence of active surveillance or data from population based surveys, policy makers are unable to determine the true hypertension of the people of India.

The recent health surveys have measured blood pressure, providing an opportunity to explore the trends in prevalence of hypertension both at the national, sub-national (state) and district level. Given the heterogeneity in the demographic and socioeconomic conditions across states in India, it is very likely that there would be considerable inter-state variations in hypertension prevalence [9]. Moreover, the socioeconomic disparities are widespread even within the state. Hence, estimates at the state and district levels are required for policy formulation, setting intervention priorities and to evaluate national programmes. This study is the first in India to provide estimates

1  
2  
3 on the prevalence of hypertension at the national level and for each state, district, and by rural and  
4 urban areas and individual characteristics such as age, sex and economic status using the most  
5 recent large scale survey data. Aside from providing estimates on hypertension prevalence, an  
6 attempt was also made to identify the correlates of hypertension.  
7  
8  
9

## 10 **Methods**

### 11 **Data**

12  
13  
14  
15 The current study is based on the data from the 4<sup>th</sup> wave of National Family Health Survey (NFHS),  
16 which is the Indian version of Demographic and Health Survey (DHS) carried out periodically in  
17 over 90 countries across the globe. NFHS 4 was conducted under the stewardship of the Ministry  
18 of Health and Family Welfare (MOH&FW) and led by International Institute for Population  
19 Sciences. The survey was a collaborative effort of 14 research organisations, including three  
20 Population Research Centres (under MOH&FW). ICF International provided technical assistance  
21 at all stages of NFHS project. NFHS 4 began on 20<sup>th</sup> January 2015 and ended on 4<sup>th</sup> December  
22 2016. The survey was conducted across all 29 states and 7 Union Territories (UTs) in India. The  
23 survey is representative not only at the national and state level but also at the district level.  
24  
25  
26  
27  
28  
29  
30

31 NFHS adopted a 2-stage stratified random sampling approach by selecting primary sampling units  
32 (PSUs) [villages in rural areas and census enumeration blocks in urban areas] with probability  
33 proportional to population size at the first stage and subsequently, picking the same number of  
34 households from each of selected PSUs through systematic random sampling. Both male and  
35 female interviewers were recruited by field agencies to interview respondents of the same sex. The  
36 data collection team made up to 3 visits in case no body was present in the chosen household or  
37 any eligible member was not available at the time of the household visit.  
38  
39  
40  
41  
42  
43

44 The household level questionnaire of NFHS covered the details on possession of certain assets and  
45 access to certain utilities. The information on assets and utilisation of utilities were used for  
46 constructing wealth index, which reflects the standard of living of households. The wealth index  
47 categorises households into 5 wealth quintiles: 'poorest', 'poor', 'middle', 'rich' and richest. In  
48 NFHS, the Biomarker Questionnaire collected details on height, weight, and haemoglobin for  
49 children, and measurements of height, weight, haemoglobin, blood pressure, and random blood  
50 glucose for women aged 15-49 years and men aged 15-54 years. The different age ranges for men  
51  
52  
53  
54  
55  
56  
57  
58  
59  
60

1  
2  
3 and women were chosen, considering the average spousal age gap of 5 years in India. The survey  
4 used same questionnaires, field procedures and procedures for biomarker measurements across the  
5 country to ensure comparability across states and to ensure the highest possible data quality. The  
6 response rate for BP measurements was 97% among women and 92% among men. Apart from  
7 taking BP measurements, all participants irrespective of their BP were asked, “Were you told on  
8 two or more different occasions by a doctor or other health professional that you had hypertension  
9 or high blood pressure?” If they responded in affirmative, they faced a follow-on question, “To  
10 lower your blood pressure, are you taking a prescribed medicine?”

11  
12 The analysis was restricted to women and men age 15-49, after excluding men aged 49-54  
13 (n=8,618) to ensure an equal age range among women and men. Missing values (n=32,268) were  
14 also excluded from analysis. Data were weighted prior to analysis.  
15  
16

### 17 18 19 20 21 22 23 **Ethics approval**

24 The study is based on an anonymous publicly available dataset with no identifiable information on  
25 the survey participants; therefore, no ethics statement is required for this work.  
26  
27  
28  
29

### 30 31 32 33 **Statistical analysis**

34 Hypertension was considered as the outcome variable of this study. Three blood pressure readings  
35 were taken in NFHS. The first measurement was discarded and then, based on the average of  
36 second and third readings of blood pressure, it was decided whether a participant was hypertensive  
37 or not. Hypertension was defined as systolic blood pressure of at least 140 mm Hg or diastolic  
38 blood pressure of at least 90 mm Hg. The definition was based on the criteria given by WHO and  
39 American Heart Association [10]. In addition, an individual is classified as having hypertension if  
40 she/he is currently taking antihypertensive medication to lower his or her blood pressure. To make  
41 the prevalence of hypertension comparable, age adjusted prevalence rates were calculated for all  
42 states, UTs and districts using the direct standardization method. The national population, as per  
43 2011 Census, was used as a reference population for carrying out the standardization technique.  
44 To understand how hypertension prevalence varies by socioeconomic status (SES), the wealth  
45 index was converted into a dichotomous variable; where the bottom 60% i.e., ‘poorest’, ‘poor’ and  
46 ‘middle’ were combined into one group (low SES), the remaining two categories were clubbed  
47 into the other category (high SES). Besides conducting bivariate analyses, multi-level (first level:  
48  
49  
50  
51  
52  
53  
54  
55  
56  
57  
58  
59  
60



individual; second level: district; third level: state) logistic regression model with random intercepts and fixed slopes were employed to calculate multilevel odds ratios (OR) with corresponding 95% confidence intervals (CI).

### **Dependent variable**

Hypertension for persons aged between 15 and 49 years. The dichotomous variable, hypertension, was defined as 1=hypertensive, else=0.

### **Explanatory variables**

Predictors were selected based on their effects on hypertension.

*Sociodemographic variables:* Age, sex, marital status, caste<sup>1</sup>, education, place of residence, wealth status. Besides sociodemographic variables, we included body mass index, tobacco use and alcohol consumption as proxy for behavioural risk factors. The education categories are defined based on number of years of education completed by an individual: 0 year as “no education”; 1 to 5 years as “primary education”; 6 to 12 years as “secondary education”; and more than 12 years of education attainment categorised as “higher studies”.

All statistical analyses were performed using STATA 14.

### ***Patient and Public Involvement***

Patients and public were not involved in the analysis of this study.

## **Results**

### **Sample characteristics**

As seen in table1, of the total 779,649 persons who participated in the survey, a little more than half of them (51.3%) were aged between 15-29 years. This is in line with the Census figures, according to which, the median age was 24 years in 2011. The results suggest that 13% of males

---

<sup>1</sup> Indian society is mainly divided into four castes within the framework of the Hindu caste system. The castes used to be classified according to occupation. Historically, many sub-castes have faced discrimination, deprivation and social exclusion on account of their assigned ‘low-status’. Recognising the marginalisation of certain communities and socioeconomic differences among different population groups, the constitution of India categorised the Indian population into four major groups: Scheduled Tribe (ST), Scheduled Caste (SC), Other Backward Class (OBC) and General. ST is the most socio-economically disadvantaged group, followed by the SC and OBC and together they comprise 69% of India’s population, with SC at 19.7%, ST at 8.5% and OBC at 41.1%.

1  
2  
3 and 27% of females never went to school and 13% of both sexes attended school only up to primary  
4 level. Almost 64% of men and 73% of women were currently married. A third of the study  
5 population were urban residents and a quarter of them were either overweight or obese. While 45%  
6 of males were users of some form of tobacco, the prevalence of tobacco use was only 6% among  
7 the females. The significant disparity in tobacco use between men and women, as revealed by  
8 NFHS data, is not typical. In fact, it is in consonance with results of other nationally representative  
9 household surveys. For instance, as per Global Adult Tobacco Survey (2016-17), 19% of men and  
10 2% of women smoke tobacco in India [11]. It may be pointed out that, traditionally, the prevalence  
11 of tobacco consumption among males is much higher than that among females in the Indian sub-  
12 continent. This may be because of cultural disapproval, prohibiting women from smoking in India.  
13 Also, this could be partly due to under-reporting of tobacco-use by women because of social non-  
14 acceptance.

15  
16 Like use of tobacco, a significantly greater proportion of men (30%) reported consuming alcohol  
17 either almost every day, about once a week or less than once a week as compared to just 1%  
18 amongst women.

### 19 20 21 **Prevalence of hypertension at national, state and district level**

22  
23 Table 2 shows crude and age adjusted prevalence of hypertension amongst persons aged 15-49  
24 years for the year 2015-16. The data shows that the age-adjusted prevalence of hypertension in  
25 India was 11.3% and the prevalence was 4 percentage points higher amongst males (13.8%) as  
26 compared to females (10.9%). Persons in the urban location (12.5%) had a marginally higher  
27 prevalence than persons in rural location-(10.6%).

28  
29 The results reveal that the age-adjusted prevalence of hypertension varied greatly between states  
30 and UTs, with a prevalence of 8.2% in Kerala to a prevalence of 20.2% in Sikkim (See figures 1  
31 and S1). Quite intriguingly, the hypertension prevalence was greatest among the north-eastern  
32 states-Sikkim (20.3%), Nagaland (17.6%), Assam (17.6%), Arunachal Pradesh (16.6%) and  
33 Tripura (15.4%). Hypertension prevalence was also very high in the following non-northeastern  
34 states-Jammu and Kashmir (15.8%), Punjab (14.8%), Himachal Pradesh (14.8%) and Telangana  
35 (14.2%). On the other hand, proportion of population suffering from hypertension was relatively  
36 low in states such as Kerala (8.2%), Bihar (8.8%), Delhi (8.6%), Rajasthan (9.1%), Uttar Pradesh  
37 (9.6%) and Jharkhand (9.6%).

Table 1. Characteristics of sample population by gender, National Family Health Survey, India,  
2015-16

| Sample Characteristics     | Total          |            | Female         |            | Male           |            |
|----------------------------|----------------|------------|----------------|------------|----------------|------------|
|                            | N              | %          | N              | %          | N              | %          |
| <b>Hypertension</b>        |                |            |                |            |                |            |
| No                         | 693,875        | 85.5       | 602,609        | 86.1       | 91,266         | 81.7       |
| Yes                        | 85,774         | 10.6       | 69,889         | 10.0       | 15,885         | 14.2       |
| No response                | 32,268         | 4.0        | 27,765         | 4.0        | 4,503          | 4.0        |
| <b>Age group</b>           |                |            |                |            |                |            |
| 15-19                      | 144,277        | 17.8       | 125,282        | 17.9       | 18,995         | 17.0       |
| 20-29                      | 272,054        | 33.5       | 239,307        | 34.2       | 32,747         | 29.3       |
| 30-39                      | 215,796        | 26.6       | 187,459        | 26.8       | 28,337         | 25.4       |
| 40-49                      | 171,285        | 21.1       | 148,215        | 21.2       | 23,070         | 20.7       |
| <b>Marital Status</b>      |                |            |                |            |                |            |
| Not married                | 210,107        | 25.9       | 170,691        | 24.4       | 39,416         | 35.3       |
| Married                    | 572,676        | 70.5       | 502,074        | 71.7       | 70,602         | 63.2       |
| Widow/separated/divorced   | 29,134         | 3.6        | 27,498         | 3.9        | 1,636          | 1.5        |
| <b>Caste</b>               |                |            |                |            |                |            |
| Others                     | 165,234        | 20.4       | 142,244        | 20.3       | 22,990         | 20.6       |
| SC                         | 146,969        | 18.1       | 126,804        | 18.1       | 20,165         | 18.1       |
| ST                         | 147,737        | 18.2       | 127,661        | 18.2       | 20,076         | 18.0       |
| OBC                        | 314,661        | 38.8       | 271,733        | 38.8       | 42,928         | 38.5       |
| No response                | 37,316         | 4.6        | 31,821         | 4.5        | 5,495          | 4.9        |
| <b>Education</b>           |                |            |                |            |                |            |
| No education               | 204,922        | 25.2       | 190,537        | 27.2       | 14,385         | 12.9       |
| Primary                    | 109,102        | 13.4       | 94,563         | 13.5       | 14,539         | 13.0       |
| Secondary                  | 401,720        | 49.5       | 336,381        | 48.0       | 65,339         | 58.5       |
| Higher                     | 96,173         | 11.8       | 78,782         | 11.3       | 17,391         | 15.6       |
| <b>Place of residence</b>  |                |            |                |            |                |            |
| Urban                      | 237,105        | 29.2       | 202,358        | 28.9       | 34,747         | 31.1       |
| Rural                      | 574,812        | 70.8       | 497,905        | 71.1       | 76,907         | 68.9       |
| <b>Wealth quintile</b>     |                |            |                |            |                |            |
| poorest                    | 152,942        | 18.8       | 134,330        | 19.2       | 18,612         | 16.7       |
| poorer                     | 173,813        | 21.4       | 150,489        | 21.5       | 23,324         | 20.9       |
| middle                     | 171,866        | 21.2       | 147,612        | 21.1       | 24,254         | 21.7       |
| richer                     | 161,338        | 19.9       | 138,213        | 19.7       | 23,125         | 20.7       |
| richest                    | 151,958        | 18.7       | 129,619        | 18.5       | 22,339         | 20.0       |
| <b>BMI</b>                 |                |            |                |            |                |            |
| Normal (18.5-24.9)         | 488,801        | 60.2       | 418,369        | 59.7       | 70,432         | 63.1       |
| Overweight (25.0-29.9)     | 114,970        | 14.2       | 98,306         | 14.0       | 16,664         | 14.9       |
| Obese ( $\geq 30$ )        | 32,523         | 4.0        | 29,516         | 4.2        | 3,007          | 2.7        |
| No Response                | 175,623        | 21.6       | 154,072        | 22.0       | 21,551         | 19.3       |
| <b>Tobacco use</b>         |                |            |                |            |                |            |
| No                         | 670,194        | 82.5       | 615,197        | 87.9       | 54,997         | 49.3       |
| Yes                        | 126,050        | 15.5       | 72,226         | 10.3       | 53,824         | 48.2       |
| No Response                | 15,673         | 1.9        | 12,840         | 1.8        | 2,833          | 2.5        |
| <b>Alcohol consumption</b> |                |            |                |            |                |            |
| never drinks               | 744,838        | 91.7       | 670,364        | 95.7       | 74,474         | 66.7       |
| almost every day           | 6,898          | 0.8        | 2,172          | 0.3        | 4,726          | 4.2        |
| About once a week          | 20,939         | 2.6        | 6,674          | 1.0        | 14,265         | 12.8       |
| Less than once a week      | 23,569         | 2.9        | 8,213          | 1.2        | 15,356         | 13.8       |
| No Response                | 15,673         | 1.9        | 12,840         | 1.8        | 2,833          | 2.5        |
| <b>Total</b>               | <b>811,917</b> | <b>100</b> | <b>700,263</b> | <b>100</b> | <b>111,654</b> | <b>100</b> |

1  
2  
3 Figure 2 shows inter-district variation in hypertension prevalence. The proportion of hypertensive  
4 population varied tremendously, ranging between 3.5% in district Mahoba, Uttar Pradesh and  
5 34.7% in district Dibang Valley, Arunachal Pradesh. A majority of districts across India recorded  
6 a high hypertension burden, with more than one-tenth of the persons aged 15-49 hypertensive in  
7 427 districts. Only 10 districts had hypertension levels below 5% and all of them except one were  
8 in EAG states. Several districts with alarmingly high prevalence of hypertension were clustered  
9 across north-eastern states. Five districts in Arunachal Pradesh, two districts in Punjab, one each  
10 in Sikkim, Assam and Andaman and Nicobar were among the top ten districts with the highest  
11 levels of hypertension. The results revealed that at least one in every five persons aged between  
12 15 and 49 were having hypertension in as many as 28 districts across India.

13  
14  
15  
16  
17  
18  
19  
20  
21 The findings highlighted that the prevalence of hypertension was higher in men than in women in  
22 most states and UTs, except in Delhi, West Bengal, Meghalaya and Jammu and Kashmir J & K  
23 (Figure S2). The sex difference in prevalence of hypertension was highest in Andaman and  
24 Nicobar Islands (12.4%), followed by Sikkim (8.4%), Himachal Pradesh (7.3%) and Manipur  
25 (7.2%). The results also suggest that, in general, the gender differentials were relatively smaller in  
26 low prevalence states than in high prevalence states. Figure3 shows the weighted prevalence of  
27 hypertension in rural and urban areas of all states. As shown in the above figure, the prevalence  
28 rate of hypertension was found to be higher in urban than in rural areas for most of the states.  
29 However, there were a few exceptions. The prevalence of hypertension was relatively higher  
30 amongst the rural folks than their urban counterparts in Punjab, Goa and Kerala. Another  
31 interesting pattern emerges while comparing the prevalence of hypertension between high and low  
32 SES categories within rural and urban areas of each of these states (Figure S3). The results suggest  
33 hypertension is no longer a disease of the rich. In fact, the distribution of the condition is changing,  
34 disproportionately affecting the economically disadvantaged in urban areas of states such as  
35 Punjab, Haryana, Jammu and Kashmir and most of the NE states. Furthermore, the phenomenon  
36 of higher prevalence of hypertension among the poor appears to be not limited to only urban areas.  
37 In rural areas of Chhattisgarh, Kerala and Mizoram, poorer individuals had higher prevalence than  
38 their richer counterparts.  
39  
40  
41  
42  
43  
44  
45  
46  
47  
48  
49  
50  
51  
52  
53  
54  
55  
56  
57  
58  
59  
60

Table2. Prevalence of hypertension in India, 2015-2016

| Prevalence | Unadjusted  |                       | Adjusted    |                       |
|------------|-------------|-----------------------|-------------|-----------------------|
|            | %           | C.I.                  | %           | C.I.                  |
| Overall    | <b>10.5</b> | <b>(10.37, 10.62)</b> | <b>11.3</b> | <b>(11.16, 11.43)</b> |
| Male       | 14.3        | (13.97, 14.70)        | 13.8        | (13.46, 14.19)        |
| Female     | 10.1        | (09.96, 10.22)        | 10.9        | (10.79, 11.06)        |
| Rural      | 9.8         | (9.09, 9.94)          | 10.6        | (10.50, 10.78)        |
| Urban      | 11.8        | (11.12, 12.12)        | 12.5        | (12.25, 12.80)        |

Also, the differences in prevalence of hypertension by low vs high SES categories were generally marginal in urban areas of most states (<2 percentage points). The weak association between GDP per capita of states and hypertension prevalence (Figure S4) is also the confirmation of the growing convergence of rich-poor difference in prevalence of hypertension, particularly in the urban areas.

### Sociodemographic differentials in prevalence

The bi-variate and multivariate analyses were carried out to understand the relative importance of socioeconomic and behavioural risk factors of hypertension. Since the bi-variate and multivariate analyses yielded very similar results, we are only presenting the findings of multivariate analysis here. Table3 shows results for multilevel logistic regression of hypertension by its different covariates. Expectedly, age was found to be an important predictor of hypertension. The likelihood of being hypertensive increased significantly with age. Odds Ratios suggest that older persons (45-49 years) were 6.7 times more likely to have hypertension than the younger individuals (15-19 years). The differences in prevalence probabilities between married, widowed and single were statistically significant. Those who were widowed, separated and divorced were more likely to have hypertension than their 'single' counterparts (OR=1.19;  $p<0.001$ ). Interestingly, married persons were also found to be at greater risk of hypertension than unmarried ones (OR=1.08;  $p<0.001$ ). Educational attainment seems to be inversely related with prevalence, though the effect of education was not significant among those who studied only up to primary level. But persons with secondary (OR=0.92;  $p<0.001$ ) or higher education (OR=0.81;  $p<0.001$ ) were less likely to be hypertensive as compared to their illiterate counterparts.

We also looked at how economic status, proxied by asset index influences the risk of hypertension in individuals. The ORs suggest a positive association between economic status and hypertension.

1  
2  
3 Compared with those in poorest quintile, people from richest quintile were having considerably  
4 higher likelihood of hypertension (0.21 percentage points). Place of residence was also found to  
5 be statistically significantly associated with hypertension. However, persons residing in rural areas  
6 (OR=0.96;  $p<0.01$ ) were marginally less likely to be at risk of hypertension than their urban folks.  
7  
8 Interestingly, caste differences in prevalence of hypertension were not much, except that persons  
9 belonging to OBC were less likely to have the condition (OR=0.96;  $p<0.001$ ) as compared to those  
10 from 'others'.  
11  
12  
13  
14  
15

16 We also examined the association between hypertension and health and life-style practices of the  
17 men and women. The ORs indicate that persons with overweight (OR=2.02;  $p<0.001$ ) or obesity  
18 issue (OR=3.22,  $p<0.001$ ) had significantly higher probability of hypertension than those with  
19 'normal' BMI. Alcohol consumption was found to be positively related with hypertension;  
20 however, no statistically significant association was found between tobacco use and hypertension.  
21 Those who drank alcohol almost every day (OR=1.45;  $p<0.000$ ), about once a week (OR=1.25;  
22  $p<0.001$ ) and less than once a week (OR=1.17;  $p<0.001$ ) were significantly more likely to suffer  
23 from hypertension than individuals without alcohol use habit.  
24  
25  
26  
27  
28  
29

30 We have explored the regional and sub-regional disparities in the prevalence of hypertension in  
31 India. Median odds ratio, MOR, indicates geographical heterogeneity in the prevalence of  
32 hypertension across India. Overall, the variation in the prevalence of hypertension was of greater  
33 magnitude at the district level (MOR= 1.32;  $p<0.001$ ) than at the state level (MOR= 1.28;  
34  $p<0.001$ ). While the MOR was 1.28 and 1.32, ORs for most individual level characteristics were  
35 relatively higher, suggesting that unexplained between-district and between-state variations are  
36 not as relevant as individual level characteristics for understanding the prevalence of hypertension.  
37  
38  
39  
40  
41  
42  
43  
44  
45  
46  
47  
48  
49  
50  
51  
52  
53  
54  
55  
56  
57  
58  
59  
60

**Table3. Results of multilevel logistic regression on hypertension, India, 2015-16**

|                            |                          | Odds Ratio | P value | 95% CI       |
|----------------------------|--------------------------|------------|---------|--------------|
| <b>Age group</b>           | 15-19                    | 1          |         |              |
|                            | 20-29                    | 1.86       | 0.000   | (1.77, 1.96) |
|                            | 30-39                    | 3.80       | 0.000   | (3.60, 4.01) |
|                            | 40-49                    | 6.71       | 0.000   | (6.36, 7.09) |
| <b>Marital Status</b>      | Unmarried                | 1          |         |              |
|                            | Married                  | 1.08       | 0.000   | (1.04, 1.12) |
|                            | Widow/separated/divorced | 1.19       | 0.000   | (1.13, 1.25) |
| <b>Caste</b>               | Others                   | 1          |         |              |
|                            | SC                       | 0.98       | 0.214   | (0.96, 1.01) |
|                            | ST                       | 1.02       | 0.312   | (0.98, 1.06) |
|                            | OBC                      | 0.96       | 0.001   | (0.94, 0.98) |
| <b>Education</b>           | No education             | 1          |         |              |
|                            | Primary                  | 1.00       | 0.914   | (0.97, 1.03) |
|                            | Secondary                | 0.92       | 0.000   | (0.90, 0.94) |
|                            | Higher                   | 0.81       | 0.000   | (0.78, 0.84) |
| <b>Place of residence</b>  | Urban                    |            |         |              |
|                            | Rural                    | 0.96       | 0.001   | (0.94, 0.98) |
| <b>Wealth Status</b>       | Poorest                  | 1          |         |              |
|                            | Poorer                   | 1.08       | 0.000   | (1.04, 1.11) |
|                            | Middle                   | 1.13       | 0.000   | (1.09, 1.16) |
|                            | Richer                   | 1.22       | 0.000   | (1.18, 1.26) |
|                            | Richest                  | 1.21       | 0.000   | (1.17, 1.26) |
| <b>BMI</b>                 | Normal                   | 1          |         |              |
|                            | Overweight (25.0-29.9)   | 2.02       | 0.000   | (1.98, 2.06) |
|                            | Obese ( $\geq 30$ )      | 3.22       | 0.000   | (3.13, 3.32) |
| <b>Tobacco use</b>         | No                       |            |         |              |
|                            | Yes                      | 1.01       | 0.395   | (0.99, 1.04) |
| <b>Alcohol consumption</b> | Never drinks             | 1          | 1       |              |
|                            | almost every day         | 1.45       | 0.000   | (1.34, 1.56) |
|                            | About once a week        | 1.25       | 0.000   | (1.19, 1.31) |
|                            | Less than once a week    | 1.17       | 0.000   | (1.11, 1.22) |
| <b>Random Effect Part</b>  |                          |            |         |              |
| Variance (SE)#             | State                    | 0.066      | 0.000   | (0.04, 0.11) |
|                            | District                 | 0.084      | 0.000   | (0.07, 0.09) |
| Median Odds Ratio (MOR)    | State                    | 1.28       |         |              |
|                            | District                 | 1.32       |         |              |

Note. # variance expressed in standard error



## Discussion

This article provides estimates on the prevalence of hypertension across different geographical areas in India and examines socioeconomic and life-style factors associated with this condition, by exploiting the latest data from the 4<sup>th</sup> round (2015-16) of NFHS. Although some previous research have attempted to understand the burden of hypertension in India [9, 12, 13], to the best of our knowledge, this study is the first comprehensive assessment of hypertension prevalence using high quality survey data of each state and district of India.

One of our key findings is that more than 11% of the population age 15-49 in India are hypertensive. However, our estimate on the age-adjusted hypertension prevalence differ considerably from the reported crude prevalence (25%) in Geldsetzer et al's (2018) study on hypertension. This discrepancy is arising mainly because of the reason that our estimates of prevalence pertain to those aged 15-49 years while the said study provided estimates for adults aged 18 and above. Besides the differences in age composition between two samples, the point to be noted is that several states and UTs were not covered in Annual Health Survey (AHS) and District Level Household Survey (DLHS) surveys, which were used for assessing hypertension prevalence in Geldsetzer et al's study. Furthermore, it should be noted while the clinical and anthropometric data for AHS were collected in 2014<sup>2</sup>, DLHS was carried out between 2012 and 2013. Hence, the pooled data may not provide true estimates of hypertension at the national level owing to inconsistencies between two surveys in terms of survey design, period of data collection (time gap) and non-inclusion of many states and UTs.

Hypertension was found to be more prevalent among males than among females. Although the prevalence of hypertension was relatively higher in urban than in rural areas at the national level, the rural-urban differences were not large, implying that hypertension epidemic is spreading very fast even in the rural population. This has serious implications for the rural people. The public health system through PHCs in rural areas is still focusing on infectious diseases, reproductive and child health and thus, has become too limited. So, people would have to rely on the private sector

---

<sup>2</sup> Although AHS was conducted during 2013-2014, the biomarker component i.e., CAB data were collected only from a sub-sample of AHS in the year 2014. For details, see <http://www.censusindia.gov.in/2011census/hh-series/HH-2/CAB-Introduction.pdf>. In contrast, in DLHS, CAB tests were carried out in all selected households.



1  
2  
3 for the management of hypertension and its associated diseases, which would substantially add to  
4 their financial strain.  
5

6  
7 Considerable inter-state and inter-district differences were found in the prevalence of  
8 hypertension. It was more common in north-eastern states, Jammu & Kashmir, Himachal Pradesh,  
9 Punjab, and Telengana than in Kerala and EAG states. The inter-state differentials might have  
10 been caused by the differences in risk exposure such as rising affluence, urbanization, sedentary  
11 life style, changing dietary habits, obesity prevalence, social stress and possibly, genetic factors.  
12 The finding of relatively lower hypertension prevalence in EAG states is consistent with evidence  
13 from the latest burden of disease study that classified these states as having low epidemiological  
14 transition level [14]. But surprisingly, Kerala, where epidemiologic transition is most advanced  
15 among all states, had recorded the lowest prevalence of hypertension. This may be due to the non-  
16 inclusion of older persons in NFHS. It should be noted that Kerala has the highest proportion of  
17 elderly population (13%) in India. However, more research is needed to pinpoint the reasons for  
18 low prevalence in Kerala. Interestingly, in north-eastern states, despite their low per capita income,  
19 the prevalence was way higher than states with much higher level of socioeconomic development.  
20 The higher burden of hypertension amongst the population of north-east could be attributed to  
21 ethnicity and food habits [15]. It may be noted that North East Indians belong to Mongoloid,  
22 whereas North Indians and South Indians are part of Indo-Aryan and Dravidian ethnic groups.  
23 Hypertension has emerged as a major epidemic in many districts. Examples being two districts of  
24 Arunachal Pradesh (part of North East India), where every third person was hypertensive and more  
25 than a fifth of the population had the condition in as many as 28 districts.  
26  
27

28  
29 In majority of the states, hypertension prevalence was higher in urban than in rural areas, though  
30 the difference was small and at times, insignificant. However, in Goa, Punjab, Kerala and  
31 Nagaland, higher prevalence of hypertension was seen among rural people as compared to their  
32 urban counterparts. Such narrowing differentials may be the result of the factors mentioned in a  
33 recent study conducted in Punjab. Tripathy and others (2016) reported that there was no rural-  
34 urban differential in terms of dietary practices and prevalence of overweight and obesity barring  
35 the fact that a markedly higher proportion of individuals from rural areas always/often add salt  
36 before/when eating as compared to those from urban areas [16].  
37  
38  
39  
40  
41  
42  
43  
44  
45  
46  
47  
48  
49  
50  
51  
52  
53  
54  
55  
56  
57  
58  
59  
60

1  
2  
3 Another major finding was the weak link between economic growth (GDP per capita) and  
4 hypertension. Our study reveals that hypertension is affecting the people in poorer and not so poor  
5 states alike. Furthermore, hypertension is not only affecting the affluent but is also widespread  
6 among the poor within states. Another salient finding is the increased proportion of poor suffering  
7 from hypertension in many states, particularly in the urban areas. This is in consonance with the  
8 findings from studies on non-communicable diseases [17]. These findings paint a disturbing trend,  
9 indicating that it is just a matter of time when the less affluent segment of the population in other  
10 states would also face a disproportionately higher burden of hypertension. This situation might  
11 have arisen due to factors such as the diffusion and adoption of 'modern' lifestyles (the changing  
12 dietary behaviour: smoking, drinking, unhealthy diets) across population groups (which is a result  
13 of urbanisation, aggressive push of junk food through advertising and marketing and related shifts  
14 in sociocultural practice), physical inactivity and high levels of depression and stress (linked to  
15 poverty and lack of equal opportunities) [18, 19].  
16

17  
18 Our study also corroborates the above observations as the evidences point to urban residence,  
19 obesity, and alcohol use as some of the key drivers of the hypertension epidemic in India. These  
20 were also supported by previous research in India [13, 16, 20]. Surprisingly, use of tobacco was  
21 not found to increase the risk of hypertension. While it is difficult to explain why use of tobacco  
22 did not display statistically significant association with hypertension, one plausible reason could  
23 be the young population of our sample. According to a recent study which examined the life-course  
24 impact of smoking on hypertension, found no statistically significant relationship between  
25 smoking and the risk of hypertension in the age-group younger than 35; though smoking was found  
26 to be significantly associated with hypertension in the later ages [21].  
27

28  
29 Our study has several notable strengths. This is the first study that used the recently released NFHS  
30 data, which is based on a sample of households that is representative at the national, state and  
31 district levels, thereby, allowing us to provide estimates of the prevalence of hypertension across  
32 various geographical levels. Further, multivariate analysis identified the key drivers of  
33 hypertension in India.  
34

35  
36 Aside from the above mentioned strengths, the study has a few limitations, which merit discussion.  
37 The findings of this study are limited to the persons aged between 15 and 49 in India. Further,  
38 NFHS provides cross-sectional data. This prevents exploration of causal pathways underlying the  
39  
40  
41  
42  
43  
44  
45  
46  
47  
48  
49  
50  
51  
52  
53  
54  
55  
56  
57  
58  
59  
60

1  
2  
3 reported associations. We could not investigate the role of behavioural risk factors such as low  
4 fruit and vegetable intake and physical inactivity in this analysis due to the non-availability of such  
5 information in the dataset.  
6  
7  
8  
9  
10

## 11 **Conclusion**

12  
13  
14 To conclude, hypertension epidemic is spreading alarmingly in India across rural and urban  
15 populations. Disturbingly, the hypertension prevalence is now becoming more concentrated  
16 among the poor in both urban and rural areas. This phenomenon of rising hypertension prevalence  
17 among the least resourceful people has serious social and economic implications for the country  
18 and warrants immediate policy interventions to prevent the catastrophe [22, 23]. The district wise  
19 estimates on this condition should be used to plan for localised interventions so that the prevalence  
20 could be brought down significantly, which would help achieve the national target of 25% relative  
21 reduction in the prevalence of hypertension by 2025 [24]. We recommend universal blood pressure  
22 screening for high prevalence districts to track the progress of interventions. However, when it  
23 comes to interventions, the emphasis should be on primary prevention of hypertension. Policy  
24 measures should be taken to improve hazardous working conditions of the poor and growing social  
25 pressures of survival responsible for 'life-style' changes such as consumption of high calorie food  
26 and alcohol. On the other hand, a diet rich in fruits and vegetables, regular physical activity and  
27 weight control should be promoted.  
28  
29  
30  
31  
32  
33  
34  
35  
36  
37

## 38 **Contributorship statement**

39  
40  
41 While SG conceptualised the paper, partly analysed the data and wrote the manuscript, MK carried  
42 out the analysis of the data. SG edited the paper. The authors discussed the results and approved  
43 the revision of the final manuscript.  
44  
45  
46  
47

## 48 **Funding**

49 Authors did not receive any funding for conducting this research.

## 50 **Data sharing statement**

51  
52  
53 The data used in this study came from the large scale surveys conducted by government agencies.  
54 All data are already in the public domain and can be accessed freely from the Government of  
55  
56  
57  
58  
59  
60

1  
2  
3 India's data sharing portals. Besides, NFHS data can also be obtained from the following website-  
4 www.iipsindia.org.  
5

### 6 **Conflicts of interest**

7  
8  
9 The authors have none to declare.  
10

### 11 **Reference**

- 12  
13 1. Registrar General of India Report on Medical Certification of Cause of Death 2013, Office of  
14 the Registrar General, New Delhi, India 2015. Available at:[www.censusindia.gov.in/2011-](http://www.censusindia.gov.in/2011-document/mccd_2013.pdf)  
15 [document/mccd\\_2013.pdf](http://www.censusindia.gov.in/2011-document/mccd_2013.pdf)  
16
- 17 2. Forouzanfar MH, Liu P, Roth GA, *et al* Global Burden of Hypertension and Systolic Blood  
18 Pressure of at Least 110 to 115 mm Hg, 1990-2015. *JAMA*. 2017; 317(2):165–182.  
19 doi:10.1001/jama.2016.19043
- 20 3. Qadeer I Health care systems in transition III. India, Part I. The Indian Experience,  
21 *Journal of Public Health Medicine*, 2000, vol.22 (pg. 25-32)  
22
- 23 4. Dev MS and Ranade A. Rising food prices and rural poverty: going beyond co-relations.  
24 *Economic and Political Weekly*, 1998, 33: 2529-2536.  
25
- 26 5. Roy A, Praveen PA, Amarchand R, *et al* Changes in hypertension prevalence, awareness,  
27 treatment and control rates over 20 years in National Capital Region of India: results from a  
28 repeat cross-sectional study. *BMJ Open* 2017;7:e015639. doi:10.1136/bmjopen-2016-015639  
29
- 30 6. Devi, P., Rao, M., Sigamani, A., Faruqui, A., Jose, M., Gupta, R., ... Xavier, D. (2012).  
31 Prevalence, risk factors and awareness of hypertension in India: a systematic review. *Journal*  
32 *Of Human Hypertension*, 27, 281. Retrieved from <https://doi.org/10.1038/jhh.2012.33>  
33
- 34 7. Agrawal VK, Bhalwar R, Basannar DR. Prevalence and Determinants of Hypertension in a  
35 Rural Community. *Med J Armed Forces India*. 2008;64(1):21–25. doi:10.1016/S0377-  
36 1237(08)80139-6  
37
- 38 8. Gupta PC, Gupta R, Pednekar MS. Hypertension prevalence and blood pressure trends in 88  
39 653 subjects in Mumbai, India. *Journal of Human Hypertension*. 2004;18: 907–10.  
40
- 41 9. Anchala, R., Kannuri, N. K., Pant, H., Khan, H., Franco, O. H., Di Angelantonio, E., &  
42 Prabhakaran, D. (2014). Hypertension in India: a systematic review and meta-analysis of  
43  
44  
45  
46  
47  
48  
49  
50  
51  
52  
53  
54  
55  
56  
57  
58  
59  
60

- prevalence, awareness, and control of hypertension. *Journal of hypertension*, 32(6), 1170–1177.
10. Pickering TG, Hall JE, Appel LJ, Falkner BE, Graves J, Hill MN, Jones DW, Kurtz T, Sheps SG, Roccella EJ: Recommendations for Blood Pressure Measurement in Humans and Experimental Animals: Part 1: Blood Pressure Measurement in Humans: A Statement for Professionals From the Subcommittee of Professional and Public Education of the American Heart Association Council on High Blood Pressure Research. *Hypertens*. 2005, 45: 142-161
  11. GATS – 2 (Global Adult Tobacco Survey – 2) Factsheet. India 2016-17. Ministry of Health and Family Welfare, Govt. of India. World Health Organisation; Tata Institute of Social Sciences.
  12. Geldsetzer P, Manne-Goehler J, Theilmann M, et al. Diabetes and Hypertension in India: A Nationally Representative Study of 1.3 Million Adults. *JAMA Intern Med*. 2018;178(3):363–372. doi:10.1001/jamainternmed.2017.8094
  13. Bhansali A, Dhandania VK, Deepa M, Anjana RM, Joshi SR, Joshi PP, Madhu SV, Rao PV, Subashini R, Sudha V, Unnikrishnan R, Das AK, Shukla DK, Kaur T, Mohan V, Pradeepa R (2015). Prevalence of and risk factors for hypertension in urban and rural India: the ICMR-INDIAB study. *J Hum Hypertens*, 29(3):204-9.
  14. Dandona L, Dandona R, Kumar GA, Shukla DK, Paul VK, Balakrishnan K, et al. Nations within a nation: variations in epidemiological transition across the states of [India](#), 1990–2016 in the Global Burden of Disease Study. *The Lancet*. 2017; 390(10111):2437–60.
  15. Mungreiphy NK, Dhall M, Tyagi R, et al. Ethnicity, obesity and health pattern among Indian population. *J Nat Sci Biol Med*. 2012;3(1):52–59. doi:10.4103/0976-9668.95955
  16. Tripathy JP, Thakur JS, Jeet G, Chawla S, Jain S. Alarming high prevalence of hypertension and pre-hypertension in North India-results from a large cross-sectional STEPS survey. Li Y, ed. *PLoS ONE*. 2017;12(12):e0188619. doi:10.1371/journal.pone.0188619.
  17. Anjana RM, Pradeepa R, Deepa M, Datta M, Sudha V, Unnikrishnan R, et al. Prevalence of diabetes and prediabetes (impaired fasting glucose and/or impaired glucose tolerance) in urban and rural India: phase I results of the Indian Council of Medical Research-India DIABetes (ICMR-INDIAB) study. *Diabetologia*. 2011;54(12):3022–7.
  18. Hawkes C. Uneven dietary development: linking the policies and processes of globalization with the nutrition transition, obesity and diet-related chronic diseases. *Global Health*. 2006;2:4. Published 2006 Mar 28. doi:10.1186/1744-8603-2-4

- 1  
2  
3  
4  
5  
6  
7  
8  
9  
10  
11  
12  
13  
14  
15  
16  
17  
18  
19  
20  
21  
22  
23  
24  
25  
26  
27  
28  
29  
30  
31  
32  
33  
34  
35  
36  
37  
38  
39
19. Warren Smit, Ariane deLannoy, Robert V.H. Dover, Estelle. Lambert, Naomi Levitt, Vanessa Watson. Making unhealthy places: The built environment and non-communicable diseases in Khayelitsha, Cape Town, *Health & Place*, Volume 39, 2016, pp. 196-203
  20. Prabhdeep Kaur, Sudha Ramachandra Rao, Ezhil Radhakrishnan. Prevalence, awareness, treatment, control and risk factors for hypertension in a rural population in South India, *International Journal of Public Health*, 2012, Volume 57, Number 1, Page 87
  21. Devi, P., Rao, M., Sigamani, A., Faruqui, A., Jose, M., Gupta, R., ... Xavier, D. (2012). Prevalence, risk factors and awareness of hypertension in India: a systematic review. *Journal Of Human Hypertension*, 27, 281. Retrieved from <https://doi.org/10.1038/jhh.2012.33>
  22. Deepa M, Anjana RM, Manjula D, Narayan KV, Mohan V. Convergence of prevalence rates of diabetes and cardiometabolic risk factors in middle and low income groups in urban India: 10-year follow-up of the Chennai Urban Population Study. *J Diabetes Sci Technol*. 2011;5(4):918–27.
  23. Gowda, M. J., Bhojani, U., Devadasan, N., & Beerenahally, T. S. (2015). The rising burden of chronic conditions among urban poor: a three-year follow-up survey in Bengaluru, India. *BMC Health Services Research*, 15(1), 330. <https://doi.org/10.1186/s12913-015-0999-5>
  24. Ministry of Health and Family Welfare (2013). National Action Plan and Monitoring Framework for Prevention and Control of NCDs, New Delhi. Accessed at [https://www.iccp-portal.org/system/files/plans/India%20%20National\\_Action\\_Plan\\_and\\_Monitoring\\_Framework\\_Prevention\\_NCD\\_2013.pdf](https://www.iccp-portal.org/system/files/plans/India%20%20National_Action_Plan_and_Monitoring_Framework_Prevention_NCD_2013.pdf)

40 Figure 1. Prevalence of hypertension across states, India, 2015-16

41 Figure 2. Prevalence of hypertension across districts, India, 2015-16

42 Figure 3. Prevalence of hypertension by sector across selected states, 2015-16

1  
2  
3  
4  
5  
6  
7  
8  
9  
10  
11  
12  
13  
14  
15  
16  
17  
18  
19  
20  
21  
22  
23  
24  
25  
26  
27  
28  
29  
30  
31  
32  
33  
34  
35  
36  
37  
38  
39  
40  
41  
42  
43  
44  
45  
46  
47  
48  
49  
50  
51  
52  
53  
54  
55  
56  
57  
58  
59  
60

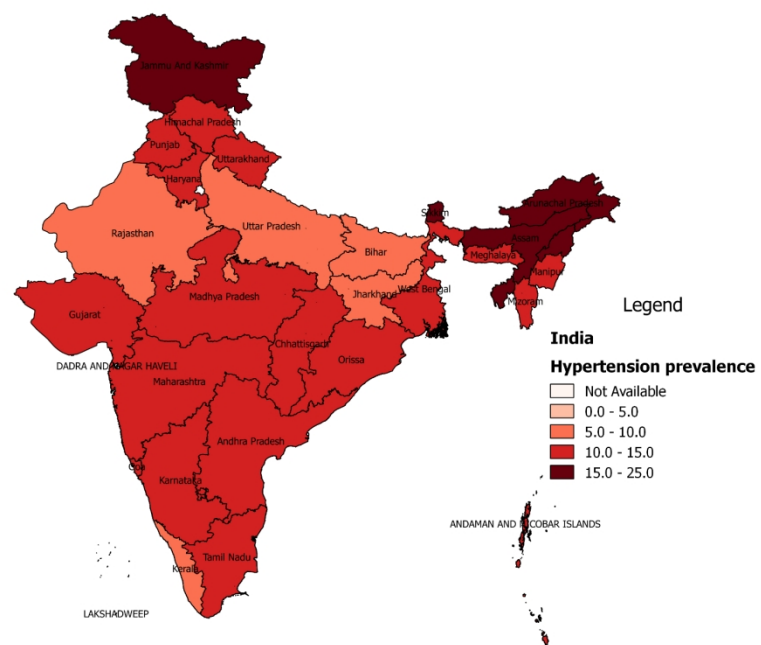

Fig 1. Prevalence of hypertension across states, India, 2015-16  
228x161mm (220 x 220 DPI)



1  
2  
3  
4  
5  
6  
7  
8  
9  
10  
11  
12  
13  
14  
15  
16  
17  
18  
19  
20  
21  
22  
23  
24  
25  
26  
27  
28  
29  
30  
31  
32  
33  
34  
35  
36  
37  
38  
39  
40  
41  
42  
43  
44  
45  
46  
47  
48  
49  
50  
51  
52  
53  
54  
55  
56  
57  
58  
59  
60



Figure 2. Prevalence of hypertension across districts, India, 2015-16

145x185mm (300 x 300 DPI)



1  
2  
3  
4  
5  
6  
7  
8  
9  
10  
11  
12  
13  
14  
15  
16  
17  
18  
19  
20  
21  
22  
23  
24  
25  
26  
27  
28  
29  
30  
31  
32  
33  
34  
35  
36  
37  
38  
39  
40  
41  
42  
43  
44  
45  
46  
47  
48  
49  
50  
51  
52  
53  
54  
55  
56  
57  
58  
59  
60



Figure3. Prevalence of hypertension by sector across selected states, 2015-16

165x87mm (150 x 150 DPI)



153x211mm (150 x 150 DPI)



127x159mm (150 x 150 DPI)

1  
2  
3  
4  
5  
6  
7  
8  
9  
10  
11  
12  
13  
14  
15  
16  
17  
18  
19  
20  
21  
22  
23  
24  
25  
26  
27  
28  
29  
30  
31  
32  
33  
34  
35  
36  
37  
38  
39  
40  
41  
42  
43  
44  
45  
46  
47  
48  
49  
50  
51  
52  
53  
54  
55  
56  
57  
58  
59  
60



228x71mm (150 x 150 DPI)

1  
2  
3  
4  
5  
6  
7  
8  
9  
10  
11  
12  
13  
14  
15  
16  
17  
18  
19  
20  
21  
22  
23  
24  
25  
26  
27  
28  
29  
30  
31  
32  
33  
34  
35  
36  
37  
38  
39  
40  
41  
42  
43  
44  
45  
46  
47  
48  
49  
50  
51  
52  
53  
54  
55  
56  
57  
58  
59  
60

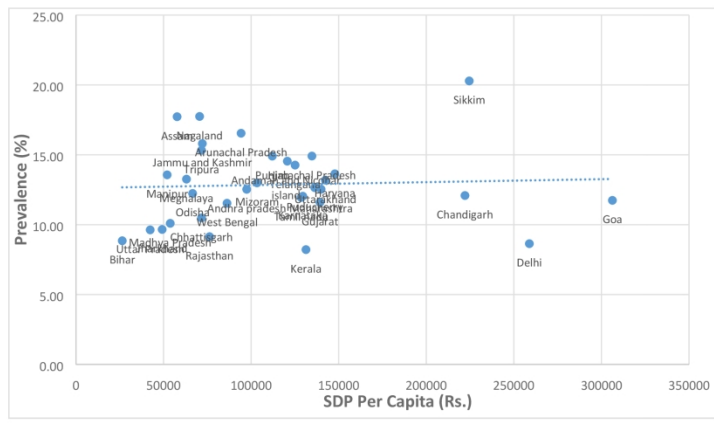

Note: The source of GDP data is Central Statistics Office, Ministry of Statistics and Programme Implementation, Government of India

215x279mm (300 x 300 DPI)

**STROBE 2007 (v4) Statement—Checklist of items that should be included in reports of *cross-sectional studies***

| Section/Topic                | Item # | Recommendation                                                                                                                                                                       | Reported on page # |
|------------------------------|--------|--------------------------------------------------------------------------------------------------------------------------------------------------------------------------------------|--------------------|
| <b>Title and abstract</b>    | 1      | (a) Indicate the study's design with a commonly used term in the title or the abstract                                                                                               | 2                  |
|                              |        | (b) Provide in the abstract an informative and balanced summary of what was done and what was found                                                                                  | 2                  |
| <b>Introduction</b>          |        |                                                                                                                                                                                      |                    |
| Background/rationale         | 2      | Explain the scientific background and rationale for the investigation being reported                                                                                                 | 4                  |
| Objectives                   | 3      | State specific objectives, including any prespecified hypotheses                                                                                                                     | 5                  |
| <b>Methods</b>               |        |                                                                                                                                                                                      |                    |
| Study design                 | 4      | Present key elements of study design early in the paper                                                                                                                              | 5                  |
| Setting                      | 5      | Describe the setting, locations, and relevant dates, including periods of recruitment, exposure, follow-up, and data collection                                                      | 5                  |
| Participants                 | 6      | (a) Give the eligibility criteria, and the sources and methods of selection of participants                                                                                          | 5                  |
| Variables                    | 7      | Clearly define all outcomes, exposures, predictors, potential confounders, and effect modifiers. Give diagnostic criteria, if applicable                                             | 5-6                |
| Data sources/<br>measurement | 8*     | For each variable of interest, give sources of data and details of methods of assessment (measurement). Describe comparability of assessment methods if there is more than one group | 6                  |
| Bias                         | 9      | Describe any efforts to address potential sources of bias                                                                                                                            | 6                  |
| Study size                   | 10     | Explain how the study size was arrived at                                                                                                                                            | 5                  |
| Quantitative variables       | 11     | Explain how quantitative variables were handled in the analyses. If applicable, describe which groupings were chosen and why                                                         | 6                  |
| Statistical methods          | 12     | (a) Describe all statistical methods, including those used to control for confounding                                                                                                | 6                  |
|                              |        | (b) Describe any methods used to examine subgroups and interactions                                                                                                                  | 6                  |
|                              |        | (c) Explain how missing data were addressed                                                                                                                                          | 6                  |
|                              |        | (d) If applicable, describe analytical methods taking account of sampling strategy                                                                                                   | 6                  |
|                              |        | (e) Describe any sensitivity analyses                                                                                                                                                |                    |
| <b>Results</b>               |        |                                                                                                                                                                                      |                    |

|                          |     |                                                                                                                                                                                                                                                                                                                                                                                                               |       |
|--------------------------|-----|---------------------------------------------------------------------------------------------------------------------------------------------------------------------------------------------------------------------------------------------------------------------------------------------------------------------------------------------------------------------------------------------------------------|-------|
| Participants             | 13* | (a) Report numbers of individuals at each stage of study—eg numbers potentially eligible, examined for eligibility, confirmed eligible, included in the study, completing follow-up, and analysed<br>(b) Give reasons for non-participation at each stage<br>(c) Consider use of a flow diagram                                                                                                               | 8     |
| Descriptive data         | 14* | (a) Give characteristics of study participants (eg demographic, clinical, social) and information on exposures and potential confounders<br>(b) Indicate number of participants with missing data for each variable of interest                                                                                                                                                                               | 8     |
| Outcome data             | 15* | Report numbers of outcome events or summary measures                                                                                                                                                                                                                                                                                                                                                          | 9     |
| Main results             | 16  | (a) Give unadjusted estimates and, if applicable, confounder-adjusted estimates and their precision (eg, 95% confidence interval). Make clear which confounders were adjusted for and why they were included<br>(b) Report category boundaries when continuous variables were categorized<br>(c) If relevant, consider translating estimates of relative risk into absolute risk for a meaningful time period | 9-12  |
| Other analyses           | 17  | Report other analyses done—eg analyses of subgroups and interactions, and sensitivity analyses                                                                                                                                                                                                                                                                                                                |       |
| <b>Discussion</b>        |     |                                                                                                                                                                                                                                                                                                                                                                                                               |       |
| Key results              | 18  | Summarise key results with reference to study objectives                                                                                                                                                                                                                                                                                                                                                      | 13-15 |
| Limitations              | 19  | Discuss limitations of the study, taking into account sources of potential bias or imprecision. Discuss both direction and magnitude of any potential bias                                                                                                                                                                                                                                                    | 15    |
| Interpretation           | 20  | Give a cautious overall interpretation of results considering objectives, limitations, multiplicity of analyses, results from similar studies, and other relevant evidence                                                                                                                                                                                                                                    | 16    |
| Generalisability         | 21  | Discuss the generalisability (external validity) of the study results                                                                                                                                                                                                                                                                                                                                         | 13    |
| <b>Other information</b> |     |                                                                                                                                                                                                                                                                                                                                                                                                               |       |
| Funding                  | 22  | Give the source of funding and the role of the funders for the present study and, if applicable, for the original study on which the present article is based                                                                                                                                                                                                                                                 | 1     |

\*Give information separately for cases and controls in case-control studies and, if applicable, for exposed and unexposed groups in cohort and cross-sectional studies.

**Note:** An Explanation and Elaboration article discusses each checklist item and gives methodological background and published examples of transparent reporting. The STROBE checklist is best used in conjunction with this article (freely available on the Web sites of PLoS Medicine at <http://www.plosmedicine.org/>, Annals of Internal Medicine at <http://www.annals.org/>, and Epidemiology at <http://www.epidem.com/>). Information on the STROBE Initiative is available at [www.strobe-statement.org](http://www.strobe-statement.org).

# BMJ Open

## Prevalence and associated risk factors of hypertension among persons aged 15-49 in India: a cross sectional study

|                                 |                                                                                                                                                                            |
|---------------------------------|----------------------------------------------------------------------------------------------------------------------------------------------------------------------------|
| Journal:                        | <i>BMJ Open</i>                                                                                                                                                            |
| Manuscript ID                   | bmjopen-2019-029714.R3                                                                                                                                                     |
| Article Type:                   | Original research                                                                                                                                                          |
| Date Submitted by the Author:   | 07-Nov-2019                                                                                                                                                                |
| Complete List of Authors:       | Ghosh, Soumitra; Tata Institute of Social Sciences, School of Health Systems Studies<br>Kumar, Manish; Tata Institute of Social Sciences, School of Health Systems Studies |
| <b>Primary Subject Heading</b>: | Epidemiology                                                                                                                                                               |
| Secondary Subject Heading:      | Public health, Health policy                                                                                                                                               |
| Keywords:                       | Hypertension < CARDIOLOGY, prevalence, Factors, India, District, state                                                                                                     |
|                                 |                                                                                                                                                                            |

SCHOLARONE™  
Manuscripts



1  
2  
3  
4  
5  
6  
7  
8  
9  
10  
11  
12  
13  
14  
15  
16  
17  
18  
19  
20  
21  
22  
23  
24  
25  
26  
27  
28  
29  
30  
31  
32  
33  
34  
35  
36  
37  
38  
39  
40  
41  
42  
43  
44  
45  
46  
47  
48  
49  
50  
51  
52  
53  
54  
55  
56  
57  
58  
59  
60

Full Title: **Prevalence and associated risk factors of hypertension among persons aged 15-49 in India: a cross sectional study**

**Authors:**

1. Soumitra Ghosh, PhD [Corresponding author]

Assistant Professor  
Centre for Health Policy, Planning and Management  
School of Health Systems Studies  
Tata Institute of Social Sciences (TISS)  
V.N.Purav Marg, Deonar  
Mumbai-88  
INDIA

Ph: +91-22-25525534;  
Fax: +91-22-25525050  
Email: [soumitraips@gmail.com](mailto:soumitraips@gmail.com); [soumitra@tiss.edu](mailto:soumitra@tiss.edu)  
URL: <https://www.tiss.edu/view/9/employee/soumitra/>  
<https://in.linkedin.com/in/soumitra-ghosh-1b343629>

2. Mr. Manish Kumar

Research Associate  
Tata Institute of Social Sciences (TISS)  
V.N.Purav Marg, Deonar  
Mumbai-88  
INDIA

Pin: 400088

Mobile: 9702511509

Email: [kumarmanishiips@gmail.com](mailto:kumarmanishiips@gmail.com)

**'Declarations of interest:** none'

**Financial disclosure statement:** We declare that we did not receive any specific funding from any source for this study.

# Prevalence and associated risk factors of hypertension among persons aged 15-49 in India: a cross-sectional study

## Abstract

**Objectives** This is the first attempt to provide estimates on the prevalence of hypertension at the national, state and district level, a prerequisite for designing effective interventions. Besides, the study aims to identify the risk factors of hypertension.

**Design** We analysed cross-sectional survey data from the 4<sup>th</sup> round (2015-16) of National Family Health Survey (NFHS). NFHS was conducted between January 2015 and December 2016, gathering information on a range of indicators including blood pressure. The age adjusted prevalence of hypertension was calculated for state comparison, while multilevel logistic regression analysis was done to assess the correlates of hypertension.

**Setting and participants** India (2015-16 n=811,917) aged 15-49 years.

**Primary and secondary outcome measures** The primary outcome is hypertension, which has been defined as systolic blood pressure (SBP)  $\geq 140$  mm Hg and/ or diastolic blood pressure (DBP)  $\geq 90$  mm Hg.

**Results** The age-adjusted prevalence of hypertension in India was 11.3% (95% CI 11.16 to 11.43) among persons aged between 15 and 49 years and was 4 percentage points higher amongst males-13.8% (95% CI 13.46 to 14.19) than among females-10.9% (95% CI 10.79 to 11.06). Persons in the urban location (12.5%, 95% CI 12.25 to 12.80) had a marginally higher prevalence than persons in rural location-(10.6%, 95% CI 10.50 to 10.78). The proportion of population suffering from hypertension varied greatly between states, with a prevalence of 8.2% (95% CI 7.58, 8.85) in Kerala to 20.3% (95% CI 18.81, 21.77) in Sikkim. Advancing age, obesity/overweight, male sex, socioeconomic status and consumption of alcohol were found to be the major predictors of hypertension.

**Conclusions** Hypertension prevalence is now becoming more concentrated amongst the poor. Policy measures should be taken to improve the hazardous working conditions and growing social pressures of survival responsible for 'life-style' changes such as consumption of high calorie food and alcohol.

**Key words:** Hypertension, prevalence, factors, state, district and India

## Article summary

### Strengths and limitations of the study

- First epidemiological study to provide estimates on prevalence of hypertension at national, state and district level
- Multivariate analysis identified the key drivers of hypertension
- The use of cross-sectional data that does not allow for exploration of causal pathways underlying the reported associations
- The role of behavioural risk factors such as low fruit and vegetable intake and physical inactivity could not be explored in this analysis
- Findings are limited to the persons aged between 15 and 49

## Introduction

Hypertension is the single largest contributor to the avoidable deaths and diseases in India. It is a leading risk factor for cardiovascular disease, which accounted for 23% of total deaths and 32% of adult deaths in 2010-2013[1]. India has committed to take an array of actions to meet the Sustainable Development Goals (SDG) target of reducing premature mortality from non-communicable diseases (NCDs) by one-third by 2030. However, much of the success in meeting this target hinges on its ability to check the rise of hypertension. The Global Burden of Hypertension study has highlighted that of the global burden of 212 million DALYs related to hypertension, 18% occurred in India in 2015[2]. The burden of hypertension in India is expected to rise considerably in the coming years due to rapid environmental and 'life-style' changes that emanate from hazardous working conditions and growing social pressures of survival [3, 4].

### *Monitoring and evaluation for SDG*

It is, therefore, imperative that blood pressure trends are monitored to evaluate the progress that the country makes vis-à-vis the SDG goal of reduction in NCD mortality. To do that, data on hypertension is needed so that stakeholders can design appropriate interventions and evaluate national programmes aimed at effectively addressing hypertension and associated NCDs. But there was a paucity of reliable information on the status of hypertension in India. As a result, to assess the magnitude of this problem, policy makers had to rely on community studies or surveys that provided self-reported data on hypertension [5, 6, 7, 8]. Further, data from small studies were extrapolated to obtain national level estimate on hypertension [9]. Although these studies were helpful and used as a key resource in the arsenal of health policy makers, in the absence of active surveillance or data from population based surveys, policy makers are unable to determine the true burden of hypertension in India.

The recent health surveys have measured blood pressure, providing an opportunity to explore the trends in prevalence of hypertension both at the national, sub-national (state) and district level. Given the heterogeneity in the demographic and socioeconomic conditions across states in India, it is very likely that there would be considerable inter-state variations in hypertension prevalence [9]. Moreover, the socioeconomic disparities are widespread even within the state. Hence, estimates at the state and district levels are required for policy formulation, setting intervention priorities and to evaluate national programmes. This study is the first in India to provide estimates

1  
2  
3 on the prevalence of hypertension at the national level and for each state, district, and by rural and  
4 urban areas and individual characteristics such as age, sex and economic status using the most  
5 recent large-scale survey data. Aside from providing estimates on hypertension prevalence, an  
6 attempt was also made to identify the correlates of hypertension.  
7  
8  
9

## 10 **Methods**

### 11 **Data**

12  
13  
14  
15 The current study is based on the data from the 4<sup>th</sup> wave of National Family Health Survey (NFHS),  
16 which is the Indian version of Demographic and Health Survey (DHS) carried out periodically in  
17 over 90 countries across the globe. NFHS 4 was conducted under the stewardship of the Ministry  
18 of Health and Family Welfare (MOH&FW) and led by International Institute for Population  
19 Sciences. The survey was a collaborative effort of 14 research organisations, including three  
20 Population Research Centres (under MOH&FW). ICF International provided technical assistance  
21 at all stages of NFHS project. NFHS 4 began on 20<sup>th</sup> January 2015 and ended on 4<sup>th</sup> December  
22 2016. The survey was conducted across all 29 states and 7 Union Territories (UTs) in India. The  
23 survey is representative not only at the national and state level but also at the district level.  
24  
25  
26  
27  
28  
29  
30

31 NFHS adopted a 2-stage stratified random sampling approach by selecting primary sampling units  
32 (PSUs) [villages in rural areas and census enumeration blocks in urban areas] with probability  
33 proportional to population size at the first stage and subsequently, picking the same number of  
34 households from each of selected PSUs through systematic random sampling. Both male and  
35 female interviewers were recruited by field agencies to interview respondents of the same sex. The  
36 data collection team made up to 3 visits in case no body was present in the chosen household or  
37 any eligible member was not available at the time of the household visit.  
38  
39  
40  
41  
42  
43

44 The household level questionnaire of NFHS covered the details on possession of 33 assets and  
45 access to certain utilities. The information on assets and utilisation of utilities were used for  
46 constructing wealth index, which reflects the standard of living of households. The wealth index  
47 categorises households into 5 wealth quintiles: 'poorest', 'poor', 'middle', 'rich' and richest. In  
48 NFHS, the Biomarker Questionnaire collected details on height, weight, and haemoglobin for  
49 children, and measurements of height, weight, haemoglobin, blood pressure, and random blood  
50 glucose for women aged 15-49 years and men aged 15-54 years. The different age ranges for men  
51  
52  
53  
54  
55  
56  
57  
58  
59  
60

1  
2  
3 and women were chosen, considering the average spousal age gap of 5 years in India. The survey  
4 used same questionnaires, field procedures and procedures for biomarker measurements across the  
5 country to ensure comparability across states and to ensure the highest possible data quality. The  
6 response rate for BP measurements was 97% among women and 92% among men. Apart from  
7 taking BP measurements, all participants irrespective of their BP were asked, “Were you told on  
8 two or more different occasions by a doctor or other health professional that you had hypertension  
9 or high blood pressure?” If they responded in the affirmative, they faced a follow-on question, “To  
10 lower your blood pressure, are you taking a prescribed medicine?”

11  
12 The analysis was restricted to women and men aged 15-49, after excluding men aged 49-54  
13 (n=8,618) to ensure an equal age range among women and men. Missing values (n=32,268) were  
14 also excluded from the analysis. Data were weighted prior to analysis.  
15  
16

### 17 **Ethics approval**

18  
19 The study is based on an anonymous publicly available dataset with no identifiable information on  
20 the survey participants; therefore, no ethics statement is required for this work.  
21  
22

### 23 **Statistical analysis**

24  
25 Hypertension was considered as the outcome variable of this study. Three blood pressure readings  
26 were taken in NFHS. The first measurement was discarded and then, based on the average of  
27 second and third readings of blood pressure, it was decided whether a participant was hypertensive  
28 or not. Hypertension was defined as systolic blood pressure of at least 140 mm Hg or diastolic  
29 blood pressure of at least 90 mm Hg. The definition was based on the criteria given by WHO and  
30 American Heart Association [10]. In addition, an individual is classified as having hypertension if  
31 she/he is currently taking antihypertensive medication to lower his or her blood pressure. To make  
32 the prevalence of hypertension comparable, age adjusted prevalence rates were calculated for all  
33 states, UTs and districts using the direct standardization method. The national population, as per  
34 2011 Census, was used as a reference population for carrying out the standardization technique.  
35 To understand how hypertension prevalence varies by socioeconomic status (SES), the wealth  
36 index was converted into a dichotomous variable; where the bottom 60% i.e., ‘poorest’, ‘poor’ and  
37 ‘middle’ were combined into one group (low SES), the remaining two categories were clubbed  
38 into the other category (high SES). Besides conducting bivariate analyses, multi-level (first level:  
39  
40  
41  
42  
43  
44  
45  
46  
47  
48  
49  
50  
51  
52  
53  
54  
55  
56  
57  
58  
59  
60

individual; second level: district; third level: state) logistic regression model with random intercepts and fixed slopes were employed to calculate multilevel odds ratios (OR) with corresponding 95% confidence intervals (CI).

### **Dependent variable**

Hypertension for persons aged between 15 and 49 years. The dichotomous variable, hypertension, was defined as 1=hypertensive, else=0.

### **Explanatory variables**

Predictors were selected based on their effects on hypertension.

*Sociodemographic variables:* Age, sex, marital status, caste<sup>1</sup>, education, place of residence, wealth status. Besides sociodemographic variables, we included body mass index, tobacco use and alcohol consumption as proxy for behavioural risk factors. The education categories are defined based on number of years of education completed by an individual: 0 year as “no education”; 1 to 5 years as “primary education”; 6 to 12 years as “secondary education”; and more than 12 years of educational attainment categorised as “higher studies”.

All statistical analyses were performed using STATA 14.

### ***Patient and Public Involvement***

No patients or public were involved in the conception, design and planning of this study.

## **Results**

### **Sample characteristics**

As seen in table1, of the total 779,649 persons who participated in the survey, a little more than half of them (51.3%) were aged between 15-29 years. It is worth noting that as per India’s Census, the median age was 24 years in 2011. Nearly 13% of men and 27% of women never went to school.

---

<sup>1</sup> Indian society is mainly divided into four castes within the framework of the Hindu caste system. The castes used to be classified according to occupation. Historically, many sub-castes have faced discrimination, deprivation and social exclusion on account of their assigned ‘low-status’. Recognising the marginalisation of certain communities and socioeconomic differences among different population groups, the constitution of India categorised the Indian population into four major groups: Scheduled Tribe (ST), Scheduled Caste (SC), Other Backward Class (OBC) and General. ST is the most socio-economically disadvantaged group, followed by the SC and OBC and together they comprise 69% of India’s population, with SC at 19.7%, ST at 8.5% and OBC at 41.1%.



Further, 13% of both sexes attended school only up to primary level. Almost 64% of men and 73% of women were currently married. A third of the study population were urban residents and a quarter of them were either overweight or obese. Around 48% of men were users of some form of tobacco as compared with 10% of women. The gap between men's and women's tobacco use is not unusual. It is in consonance with results of other nationally representative household surveys. For instance, as per Global Adult Tobacco Survey (2016-17), 19% of men and 2% of women smoke tobacco in India [11]. It may be pointed out that traditionally tobacco usage is significantly higher in males than in females in the Indian sub-continent. This could be attributed to cultural disapproval, prohibiting women from smoking in India. Under-reporting of tobacco use by women is also partly responsible.

Like tobacco use, a significantly greater proportion of men (nearly 31%) reported consuming alcohol either almost every day, about once a week or less than once a week as compared to 2.5% amongst women.

### **Prevalence of hypertension at national, state and district level**

Table 2 shows crude and age-adjusted prevalence of hypertension amongst persons aged 15-49 years for the year 2015-16. The data reveals that the age-adjusted prevalence of hypertension in India was 11.3% and the prevalence was 4 percentage points higher in men (13.8%) than in women (10.9%). Hypertension prevalence was 12.5% in urban, compared with 10.6% in rural location.

The results indicate that the age-adjusted prevalence of hypertension varied greatly between states and UTs, with a prevalence of 8.2% in Kerala to a prevalence of 20.2% in Sikkim (See figures 1 and S1). Quite intriguingly, the prevalence of hypertension was highest in the north-eastern (NE) states, namely Sikkim (20.2%), Nagaland (17.6%), Assam (17.6%), Arunachal Pradesh (16.6%) and Tripura (15.4%). Further, hypertension prevalence was very high in few non-NE states, viz Jammu and Kashmir (15.8%), Punjab (14.8%), Himachal Pradesh (14.8%) and Telangana (14.2%). On the other hand, proportion of population suffering from hypertension was relatively low in states such as Kerala (8.2%), Bihar (8.8%), Delhi (8.6%), Rajasthan (9.1%), Uttar Pradesh (9.6%) and Jharkhand (9.6%).



Table 1. Characteristics of sample population by gender, National Family Health Survey, India,  
2015-16

| Sample Characteristics     | Total          |            | Female         |            | Male           |            |
|----------------------------|----------------|------------|----------------|------------|----------------|------------|
|                            | N              | %          | N              | %          | N              | %          |
| <b>Hypertension</b>        |                |            |                |            |                |            |
| No                         | 693,875        | 85.5       | 602,609        | 86.1       | 91,266         | 81.7       |
| Yes                        | 85,774         | 10.6       | 69,889         | 10.0       | 15,885         | 14.2       |
| No response                | 32,268         | 4.0        | 27,765         | 4.0        | 4,503          | 4.0        |
| <b>Age group</b>           |                |            |                |            |                |            |
| 15-19                      | 144,277        | 17.8       | 125,282        | 17.9       | 18,995         | 17.0       |
| 20-29                      | 272,054        | 33.5       | 239,307        | 34.2       | 32,747         | 29.3       |
| 30-39                      | 215,796        | 26.6       | 187,459        | 26.8       | 28,337         | 25.4       |
| 40-49                      | 171,285        | 21.1       | 148,215        | 21.2       | 23,070         | 20.7       |
| <b>Marital Status</b>      |                |            |                |            |                |            |
| Not married                | 210,107        | 25.9       | 170,691        | 24.4       | 39,416         | 35.3       |
| Married                    | 572,676        | 70.5       | 502,074        | 71.7       | 70,602         | 63.2       |
| Widow/separated/divorced   | 29,134         | 3.6        | 27,498         | 3.9        | 1,636          | 1.5        |
| <b>Caste</b>               |                |            |                |            |                |            |
| Others                     | 165,234        | 20.4       | 142,244        | 20.3       | 22,990         | 20.6       |
| SC                         | 146,969        | 18.1       | 126,804        | 18.1       | 20,165         | 18.1       |
| ST                         | 147,737        | 18.2       | 127,661        | 18.2       | 20,076         | 18.0       |
| OBC                        | 314,661        | 38.8       | 271,733        | 38.8       | 42,928         | 38.5       |
| No response                | 37,316         | 4.6        | 31,821         | 4.5        | 5,495          | 4.9        |
| <b>Education</b>           |                |            |                |            |                |            |
| No education               | 204,922        | 25.2       | 190,537        | 27.2       | 14,385         | 12.9       |
| Primary                    | 109,102        | 13.4       | 94,563         | 13.5       | 14,539         | 13.0       |
| Secondary                  | 401,720        | 49.5       | 336,381        | 48.0       | 65,339         | 58.5       |
| Higher                     | 96,173         | 11.8       | 78,782         | 11.3       | 17,391         | 15.6       |
| <b>Place of residence</b>  |                |            |                |            |                |            |
| Urban                      | 237,105        | 29.2       | 202,358        | 28.9       | 34,747         | 31.1       |
| Rural                      | 574,812        | 70.8       | 497,905        | 71.1       | 76,907         | 68.9       |
| <b>Wealth quintile</b>     |                |            |                |            |                |            |
| poorest                    | 152,942        | 18.8       | 134,330        | 19.2       | 18,612         | 16.7       |
| poorer                     | 173,813        | 21.4       | 150,489        | 21.5       | 23,324         | 20.9       |
| middle                     | 171,866        | 21.2       | 147,612        | 21.1       | 24,254         | 21.7       |
| richer                     | 161,338        | 19.9       | 138,213        | 19.7       | 23,125         | 20.7       |
| richest                    | 151,958        | 18.7       | 129,619        | 18.5       | 22,339         | 20.0       |
| <b>BMI</b>                 |                |            |                |            |                |            |
| Normal (18.5-24.9)         | 488,801        | 60.2       | 418,369        | 59.7       | 70,432         | 63.1       |
| Overweight (25.0-29.9)     | 114,970        | 14.2       | 98,306         | 14.0       | 16,664         | 14.9       |
| Obese ( $\geq 30$ )        | 32,523         | 4.0        | 29,516         | 4.2        | 3,007          | 2.7        |
| No Response                | 175,623        | 21.6       | 154,072        | 22.0       | 21,551         | 19.3       |
| <b>Tobacco use</b>         |                |            |                |            |                |            |
| No                         | 670,194        | 82.5       | 615,197        | 87.9       | 54,997         | 49.3       |
| Yes                        | 126,050        | 15.5       | 72,226         | 10.3       | 53,824         | 48.2       |
| No Response                | 15,673         | 1.9        | 12,840         | 1.8        | 2,833          | 2.5        |
| <b>Alcohol consumption</b> |                |            |                |            |                |            |
| never drinks               | 744,838        | 91.7       | 670,364        | 95.7       | 74,474         | 66.7       |
| almost every day           | 6,898          | 0.8        | 2,172          | 0.3        | 4,726          | 4.2        |
| About once a week          | 20,939         | 2.6        | 6,674          | 1.0        | 14,265         | 12.8       |
| Less than once a week      | 23,569         | 2.9        | 8,213          | 1.2        | 15,356         | 13.8       |
| No Response                | 15,673         | 1.9        | 12,840         | 1.8        | 2,833          | 2.5        |
| <b>Total</b>               | <b>811,917</b> | <b>100</b> | <b>700,263</b> | <b>100</b> | <b>111,654</b> | <b>100</b> |

1  
2  
3 Figure 2 displays the inter-district variations in hypertension prevalence. The proportion of  
4 hypertensive population varied tremendously, ranging between 3.5% in district Mahoba, Uttar  
5 Pradesh and 34.7% in district Dibang Valley, Arunachal Pradesh. The majority of the districts  
6 across the country recorded a high hypertension burden, with more than one-tenth of the persons  
7 aged 15-49 hypertensive in 427 districts. Only 10 districts had hypertension levels below 5% and  
8 all of them except one were in the relatively less advanced states. Several districts with alarmingly  
9 high prevalence of hypertension were clustered across NE states. Five districts in Arunachal  
10 Pradesh, two districts in Punjab, one each in Sikkim, Assam and Andaman and Nicobar were  
11 among the top ten districts with the highest levels of hypertension. The results revealed that at least  
12 one in every five persons aged between 15 and 49 were having hypertension in as many as 28  
13 districts across India.  
14  
15  
16  
17  
18  
19  
20  
21  
22

23 The findings highlighted that the prevalence of hypertension was higher in men than in women in  
24 most states and UTs, except in Delhi, West Bengal, Meghalaya and Jammu and Kashmir (Figure  
25 S2). The sex difference in prevalence of hypertension was highest in Andaman and Nicobar Islands  
26 (12.4%), followed by Sikkim (8.4%), Himachal Pradesh (7.3%) and Manipur (7.2%). The results  
27 also suggest that, in general, the gender differentials were relatively smaller in low prevalence  
28 states than in high prevalence states. Figure3 shows the prevalence of hypertension in rural and  
29 urban settings of all states. As shown in the above figure, the prevalence rate of hypertension was  
30 found to be higher in urban than in rural areas for most of the states. However, there were a few  
31 exceptions. The prevalence of hypertension was relatively higher amongst the rural folks than their  
32 urban counterparts in Punjab, Goa and Kerala. Another interesting pattern emerges while  
33 comparing the prevalence of hypertension between high and low SES categories within rural and  
34 urban areas of each of these states (Figure S3). The results suggest hypertension is no longer a  
35 disease of the rich. In fact, the distribution of the condition is changing, disproportionately  
36 affecting the economically disadvantaged in urban areas of the more developed states such as  
37 Punjab, Haryana, Jammu and Kashmir and most of the NE states. Furthermore, the phenomenon  
38 of higher prevalence of hypertension among the poor appears to be not limited to only urban  
39 setting. In rural areas of Chhattisgarh, Kerala and Mizoram, the burden of hypertension was  
40 relatively higher among people from lower socioeconomic groups than those from higher  
41 socioeconomic groups. Furthermore, the differences in prevalence of hypertension by low vs high  
42 SES categories were generally insignificant in urban areas of most states (<2 percentage points).  
43  
44  
45  
46  
47  
48  
49  
50  
51  
52  
53  
54  
55  
56  
57  
58  
59  
60

Table 2. Prevalence of hypertension in India, 2015-2016

| Prevalence | Unadjusted  |                       | Adjusted    |                       |
|------------|-------------|-----------------------|-------------|-----------------------|
|            | %           | C.I.                  | %           | C.I.                  |
| Overall    | <b>10.5</b> | <b>(10.37, 10.62)</b> | <b>11.3</b> | <b>(11.16, 11.43)</b> |
| Male       | 14.3        | (13.97, 14.70)        | 13.8        | (13.46, 14.19)        |
| Female     | 10.1        | (09.96, 10.22)        | 10.9        | (10.79, 11.06)        |
| Rural      | 9.8         | (9.09, 9.94)          | 10.6        | (10.50, 10.78)        |
| Urban      | 11.8        | (11.12, 12.12)        | 12.5        | (12.25, 12.80)        |

The weak association between GDP per capita of states and hypertension prevalence (Figure S4) is also the confirmation of the growing convergence of rich-poor difference in the prevalence of hypertension, particularly in the urban areas.

### Sociodemographic differentials in prevalence

The bi-variate and multivariate analyses were carried out to understand the relative importance of socioeconomic and behavioural risk factors of hypertension. Since the bi-variate and multivariate analyses yielded very similar results, we are only presenting the findings of multivariate analysis here. Table 3 shows results for multilevel logistic regression of hypertension by its different covariates. Expectedly, age was found to be an important predictor of hypertension. The likelihood of being hypertensive increased significantly with age. Odds Ratios suggest that the risk of hypertension was 6.7 times higher in older age group (45-49 years) than in younger age group (15-19 years). The differences in prevalence probabilities between married, widowed and single were statistically significant. Those who were widowed, separated and divorced were more likely to have hypertension than their single counterparts (OR=1.19;  $p<0.001$ ). Interestingly, married persons were also found to be at greater risk of hypertension than those who were never married or single (OR=1.08;  $p<0.001$ ). Educational attainment seems to be inversely related with prevalence, though the effect of education was not significant among those who studied only up to primary level. But persons with secondary (OR=0.92;  $p<0.001$ ) or higher education (OR=0.81;  $p<0.001$ ) were less likely to be hypertensive as compared to those with no formal education.

We tried to understand whether economic status affects hypertension risk in people. The ORs suggest a positive association between economic status and hypertension.

Table 3. Results of multilevel logistic regression on hypertension, India, 2015-16

|                            |                          | Odds Ratio | P value | 95% CI       |
|----------------------------|--------------------------|------------|---------|--------------|
| <b>Age group</b>           | 15-19                    | 1          |         |              |
|                            | 20-29                    | 1.86       | 0.000   | (1.77, 1.96) |
|                            | 30-39                    | 3.80       | 0.000   | (3.60, 4.01) |
|                            | 40-49                    | 6.71       | 0.000   | (6.36, 7.09) |
| <b>Marital Status</b>      | Unmarried                | 1          |         |              |
|                            | Married                  | 1.08       | 0.000   | (1.04, 1.12) |
|                            | Widow/separated/divorced | 1.19       | 0.000   | (1.13, 1.25) |
| <b>Caste</b>               | Others                   | 1          |         |              |
|                            | SC                       | 0.98       | 0.214   | (0.96, 1.01) |
|                            | ST                       | 1.02       | 0.312   | (0.98, 1.06) |
|                            | OBC                      | 0.96       | 0.001   | (0.94, 0.98) |
| <b>Education</b>           | No education             | 1          |         |              |
|                            | Primary                  | 1.00       | 0.914   | (0.97, 1.03) |
|                            | Secondary                | 0.92       | 0.000   | (0.90, 0.94) |
|                            | Higher                   | 0.81       | 0.000   | (0.78, 0.84) |
| <b>Place of residence</b>  | Urban                    |            |         |              |
|                            | Rural                    | 0.96       | 0.001   | (0.94, 0.98) |
| <b>Wealth Status</b>       | Poorest                  | 1          |         |              |
|                            | Poorer                   | 1.08       | 0.000   | (1.04, 1.11) |
|                            | Middle                   | 1.13       | 0.000   | (1.09, 1.16) |
|                            | Richer                   | 1.22       | 0.000   | (1.18, 1.26) |
|                            | Richest                  | 1.21       | 0.000   | (1.17, 1.26) |
| <b>BMI</b>                 | Normal                   | 1          |         |              |
|                            | Overweight (25.0-29.9)   | 2.02       | 0.000   | (1.98, 2.06) |
|                            | Obese ( $\geq 30$ )      | 3.22       | 0.000   | (3.13, 3.32) |
| <b>Tobacco use</b>         | No                       |            |         |              |
|                            | Yes                      | 1.01       | 0.395   | (0.99, 1.04) |
| <b>Alcohol consumption</b> | Never drinks             | 1          | 1       |              |
|                            | almost every day         | 1.45       | 0.000   | (1.34, 1.56) |
|                            | About once a week        | 1.25       | 0.000   | (1.19, 1.31) |
|                            | Less than once a week    | 1.17       | 0.000   | (1.11, 1.22) |
| <b>Random Effect Part</b>  |                          |            |         |              |
| Variance (SE)#             | State                    | 0.066      | 0.000   | (0.04, 0.11) |
|                            | District                 | 0.084      | 0.000   | (0.07, 0.09) |
| Median Odds Ratio (MOR)    | State                    | 1.28       |         |              |
|                            | District                 | 1.32       |         |              |

Note. # variance expressed in standard error

1  
2  
3 Compared with those in poorest quintile, people from richest quintile were having considerably  
4 higher likelihood of hypertension (0.21 percentage points). Place of residence was also found to  
5 be statistically significantly associated with hypertension. Those from rural areas (OR=0.96;  
6 p<0.01) were at a lower risk for hypertension. Caste differences in prevalence of hypertension  
7 were not much, except that persons belonging to OBC were less likely to have the condition  
8 (OR=0.96; p<0.001) as compared to those from others.  
9

10  
11  
12  
13  
14 Overweight or obese persons were significantly more likely to suffer from hypertension (OR=2.02,  
15 p<0.001 and OR=3.22, p<0.001, respectively). Alcohol consumption was found to be positively  
16 related with hypertension; however, no statistically significant association was found between  
17 tobacco use and hypertension. Those who drank alcohol almost every day (OR=1.45; p<0.000),  
18 about once a week (OR=1.25; p<0.001) and less than once a week (OR=1.17; p<0.001) had a  
19 higher risk of hypertension than people without alcohol use habit.  
20  
21  
22  
23  
24

25 We have explored the regional and sub-regional disparities in the prevalence of hypertension in  
26 India. Median odds ratio (MOR) indicates geographical heterogeneity in the prevalence of  
27 hypertension across India. Overall, the variation in the prevalence of hypertension was of greater  
28 magnitude at the district level (MOR= 1.32; p<0.001) than at the state level (MOR= 1.28;  
29 p<0.001). While the MOR was 1.28 and 1.32, ORs for most individual level characteristics were  
30 relatively higher, suggesting that unexplained between-district and between-state variations are  
31 not as relevant as individual level characteristics for understanding the prevalence of hypertension.  
32  
33  
34  
35  
36  
37

## 38 **Discussion**

39  
40 This article provides estimates on the prevalence of hypertension across different geographical  
41 areas in India and examines socioeconomic and life-style factors associated with this condition, by  
42 exploiting the latest data from the 4<sup>th</sup> round (2015-16) of NFHS. Although some previous research  
43 have attempted to understand the burden of hypertension in India [9, 12, 13], to the best of our  
44 knowledge, this study is the first comprehensive assessment of hypertension prevalence using high  
45 quality survey data of each state and district of India.  
46  
47  
48  
49  
50

51 One of our key findings is that more than 11% of the population aged 15-49 in India are  
52 hypertensive. However, our estimate on the age-adjusted hypertension prevalence differ  
53 considerably from the reported crude prevalence (25%) in Geldsetzer et al's (2018) study on  
54  
55  
56  
57  
58  
59  
60

1  
2  
3 hypertension. This discrepancy is arising mainly because our estimates of prevalence pertain to  
4 those aged 15-49 years while the said study provided estimates for adults aged 18 years or older.  
5 Besides the differences in age composition between two samples, several states and UTs were not  
6 covered in Annual Health Survey (AHS) and District Level Household Survey (DLHS) surveys,  
7 which were used for assessing hypertension prevalence in Geldsetzer et al's study. Furthermore,  
8 while the clinical and anthropometric data for AHS were collected in 2014<sup>2</sup>, DLHS was carried  
9 out between 2012 and 2013. As a result, the pooled data may not provide true estimates of  
10 hypertension at the national level owing to inconsistencies between two surveys in terms of survey  
11 design, period of data collection (time gap) and non-inclusion of many states and UTs.  
12  
13  
14  
15  
16  
17  
18

19 Hypertension was found to be more prevalent in men than in women. Although the prevalence of  
20 hypertension was relatively higher in urban than in rural areas at the national level, the rural-urban  
21 differences were small, implying that hypertension epidemic is spreading very fast even in the  
22 rural population. This has serious implications for the rural people. The public health system  
23 through primary health centres in rural areas is still focusing on infectious diseases, reproductive  
24 and child health and thus, has become too limited. So, people would have to rely on the private  
25 sector for the management of hypertension and its associated diseases, which would substantially  
26 add to their financial strain.  
27  
28  
29  
30  
31  
32  
33

34 Considerable inter-state and inter-district differences were found in the prevalence of  
35 hypertension. It was more common in NE states, Jammu & Kashmir, Himachal Pradesh, Punjab,  
36 and Telengana than in Kerala and less advanced states. The inter-state differentials might have  
37 been caused by the differences in risk exposure such as rising affluence, urbanization, sedentary  
38 life style, changing dietary habits, obesity prevalence, social stress and possibly, genetic factors.  
39 The finding of relatively lower hypertension prevalence in poorer states is consistent with evidence  
40 from the latest burden of disease study that classified these states as having low epidemiological  
41 transition level [14]. But surprisingly, Kerala, where epidemiologic transition is most advanced  
42 among all states, had recorded the lowest prevalence of hypertension. This may be due to the non-  
43 inclusion of older persons in NFHS. It should be noted that Kerala has the highest proportion of  
44 elderly population (13%) in India. However, more research is needed to pinpoint the reasons for  
45  
46  
47  
48  
49  
50  
51  
52  
53

---

54 <sup>2</sup> Although AHS was conducted during 2013-2014, the biomarker component i.e., CAB data were collected only from a sub-sample  
55 of AHS in the year 2014. For details, see <http://www.censusindia.gov.in/2011census/hh-series/HH-2/CAB-Introduction.pdf>. In  
56 contrast, in DLHS, CAB tests were carried out in all selected households.  
57  
58  
59  
60

1  
2  
3 low prevalence in Kerala. Interestingly, in NE states, despite their low per capita income, the  
4 prevalence was way higher than states with much higher level of socioeconomic development. The  
5 higher burden of hypertension amongst the population of NE could be attributed to ethnicity and  
6 food habits [15]. It may be noted that NE Indians belong to Mongoloid, whereas North Indians  
7 and South Indians are part of Indo-Aryan and Dravidian ethnic groups. Hypertension has emerged  
8 as a major epidemic in many districts. Examples being two districts of Arunachal Pradesh (part of  
9 NE India), where every third person was hypertensive and more than a fifth of the population had  
10 the condition in as many as 28 districts.

11  
12 In majority of the states, hypertension prevalence was higher in urban than in rural areas, though  
13 the difference was not large and at times, insignificant. Further, in Goa, Punjab, Kerala and  
14 Nagaland, the prevalence of hypertension was observed to be higher in rural than in urban  
15 communities. Such narrowing differentials may be the result of the factors mentioned in a recent  
16 study conducted in Punjab. Tripathy and others (2016) reported that there was no rural-urban  
17 differential in terms of dietary practices and prevalence of overweight and obesity barring the fact  
18 that a markedly higher proportion of individuals from rural areas always/often add salt  
19 before/when eating as compared to those from urban areas [16].

20  
21 Another major finding was the weak link between economic growth (GDP per capita) and  
22 hypertension. Our study reveals that hypertension is affecting the people in more advanced and  
23 less advanced states alike. Furthermore, hypertension is not only affecting the affluent but is also  
24 widespread among the poor within states. Another salient finding is the increased proportion of  
25 poor suffering from hypertension in many states, particularly in the urban areas. This actually  
26 confirms the trend seen in studies on non-communicable diseases [17]. More importantly, these  
27 findings paint a disturbing pattern, indicating that it is just a matter of time when the less affluent  
28 segment of the population in other states would also face a disproportionately higher burden of  
29 hypertension. The situation might have arisen due to factors such as the diffusion and adoption of  
30 'modern' lifestyles (the changing dietary behaviour: smoking, drinking, unhealthy diets) across  
31 population groups (which is a result of urbanisation, aggressive push of junk food through  
32 advertising and marketing and related shifts in sociocultural practice), physical inactivity and high  
33 levels of depression and stress (linked to poverty and lack of equal opportunities) [18, 19]. Our  
34 study corroborates the above observations as the evidences point to urban residence, obesity, and  
35  
36  
37  
38  
39  
40  
41  
42  
43  
44  
45  
46  
47  
48  
49  
50  
51  
52  
53  
54  
55  
56  
57  
58  
59  
60



1  
2  
3 alcohol use as some of the key drivers of the hypertension epidemic in India. These were also  
4 supported by previous research on hypertension in India [13, 16, 20]. Surprisingly, use of tobacco  
5 was not found to increase the risk of hypertension. While it is difficult to explain why use of  
6 tobacco did not display statistically significant association with hypertension, one plausible reason  
7 could be the young population of our sample. According to a recent study which examined the  
8 life-course impact of smoking on hypertension, found no statistically significant relationship  
9 between smoking and the risk of hypertension in the age-group younger than 35; though smoking  
10 was found to be significantly associated with hypertension in the later ages [21].

11  
12 Our study has several notable strengths. This is the first study that used the recently released NFHS  
13 data, which is based on a sample of households that is representative at the national, state and  
14 district levels, thereby, allowing us to provide estimates of the prevalence of hypertension across  
15 various geographical levels. Further, multivariate analysis identified the key drivers of  
16 hypertension in India.

17  
18 Aside from the above mentioned strengths, the study has a few limitations, which merit discussion.  
19 The findings of this study are limited to the persons aged between 15 and 49 in India. Further,  
20 NFHS provides cross-sectional data. This prevents exploration of causal pathways underlying the  
21 reported associations. We could not investigate the role of behavioural risk factors such as low  
22 fruit and vegetable intake and physical inactivity in this analysis due to the non-availability of such  
23 information in the dataset.

## 24 25 26 27 28 29 30 31 32 33 34 35 36 37 38 **Conclusion**

39  
40 To conclude, hypertension epidemic is spreading alarmingly in India across rural and urban  
41 populations. Disturbingly, the hypertension prevalence is now becoming more concentrated  
42 among the poor in both urban and rural areas. This phenomenon of rising hypertension prevalence  
43 among the least resourceful people has serious social and economic implications for the country  
44 and warrants immediate policy interventions to prevent the catastrophe [22, 23]. The district wise  
45 estimates on this condition should be used to plan for localised interventions so that the prevalence  
46 could be brought down significantly, which would help achieve the national target of 25% relative  
47 reduction in the prevalence of hypertension by 2025 [24]. We recommend universal blood pressure  
48 screening for high prevalence districts to track the progress of interventions. However, when it  
49 comes to interventions, the emphasis should be on primary prevention of hypertension. Policy  
50  
51  
52  
53  
54  
55  
56  
57  
58  
59  
60



measures should be taken to improve hazardous working conditions of the poor and growing social pressures of survival responsible for 'life-style' changes such as consumption of high calorie food and alcohol. On the other hand, a diet rich in fruits and vegetables, regular physical activity and weight control should be promoted.

### Contributorship statement

While SG conceptualised the paper, partly analysed the data and wrote the manuscript, MK carried out the analysis of the data. SG edited the paper. The authors discussed the results and approved the revision of the final manuscript.

### Funding

Authors did not receive any funding for conducting this research.

### Data sharing statement

The data used in this study came from the large scale surveys conducted by government agencies. All data are already in the public domain and can be accessed freely from the Government of India's data sharing portals. Besides, NFHS data can also be obtained from the following website- [www.iipsindia.org](http://www.iipsindia.org).

### Conflicts of interest

The authors have none to declare.

### Reference

1. Registrar General of India Report on Medical Certification of Cause of Death 2013, Office of the Registrar General, New Delhi, India 2015. Available at: [www.censusindia.gov.in/2011-document/mccd\\_2013.pdf](http://www.censusindia.gov.in/2011-document/mccd_2013.pdf)
2. Forouzanfar MH, Liu P, Roth GA, *et al* Global Burden of Hypertension and Systolic Blood Pressure of at Least 110 to 115 mm Hg, 1990-2015. *JAMA*. 2017; 317(2):165-182. doi:10.1001/jama.2016.19043
3. Qadeer I Health care systems in transition III. India, Part I. The Indian Experience, *Journal of Public Health Medicine*, 2000, vol.22 (pg. 25-32)
4. Dev MS and Ranade A. Rising food prices and rural poverty: going beyond co-relations. *Economic and Political Weekly*, 1998, 33: 2529-2536.

- 1  
2  
3  
4  
5  
6  
7  
8  
9  
10  
11  
12  
13  
14  
15  
16  
17  
18  
19  
20  
21  
22  
23  
24  
25  
26  
27  
28  
29  
30  
31  
32  
33  
34  
35  
36  
37  
38  
39  
40  
41  
42  
43  
44  
45  
46  
47  
48  
49  
50  
51  
52  
53  
54  
55  
56  
57  
58  
59  
60
5. Roy A, Praveen PA, Amarchand R, *et al* Changes in hypertension prevalence, awareness, treatment and control rates over 20 years in National Capital Region of India: results from a repeat cross-sectional study. *BMJ Open* 2017;7:e015639. doi:10.1136/bmjopen-2016-015639
6. Devi, P., Rao, M., Sigamani, A., Faruqui, A., Jose, M., Gupta, R., ... Xavier, D. (2012). Prevalence, risk factors and awareness of hypertension in India: a systematic review. *Journal Of Human Hypertension*, 27, 281. Retrieved from <https://doi.org/10.1038/jhh.2012.33>
7. Agrawal VK, Bhalwar R, Basannar DR. Prevalence and Determinants of Hypertension in a Rural Community. *Med J Armed Forces India*. 2008;64(1):21–25. doi:10.1016/S0377-1237(08)80139-6
8. Gupta PC, Gupta R, Pednekar MS. Hypertension prevalence and blood pressure trends in 88 653 subjects in Mumbai, India. *Journal of Human Hypertension*. 2004;18: 907–10.
9. Anchala, R., Kannuri, N. K., Pant, H., Khan, H., Franco, O. H., Di Angelantonio, E., & Prabhakaran, D. (2014). Hypertension in India: a systematic review and meta-analysis of prevalence, awareness, and control of hypertension. *Journal of hypertension*, 32(6), 1170–1177.
10. Pickering TG, Hall JE, Appel LJ, Falkner BE, Graves J, Hill MN, Jones DW, Kurtz T, Sheps SG, Roccella EJ: Recommendations for Blood Pressure Measurement in Humans and Experimental Animals: Part 1: Blood Pressure Measurement in Humans: A Statement for Professionals From the Subcommittee of Professional and Public Education of the American Heart Association Council on High Blood Pressure Research. *Hypertens*. 2005, 45: 142-161
11. GATS – 2 (Global Adult Tobacco Survey – 2) Factsheet. India 2016-17. Ministry of Health and Family Welfare, Govt. of India. World Health Organisation; Tata Institute of Social Sciences.
12. Geldsetzer P, Manne-Goehler J, Theilmann M, et al. Diabetes and Hypertension in India: A Nationally Representative Study of 1.3 Million Adults. *JAMA Intern Med*. 2018;178(3):363–372. doi:10.1001/jamainternmed.2017.8094
13. Bhansali A, Dhandania VK, Deepa M, Anjana RM, Joshi SR, Joshi PP, Madhu SV, Rao PV, Subashini R, Sudha V, Unnikrishnan R, Das AK, Shukla DK, Kaur T, Mohan V, Pradeepa R (2015). Prevalence of and risk factors for hypertension in urban and rural India: the ICMR-INDIAB study. *J Hum Hypertens*, 29(3):204-9.

14. Dandona L, Dandona R, Kumar GA, Shukla DK, Paul VK, Balakrishnan K, et al. Nations within a nation: variations in epidemiological transition across the states of [India](#), 1990–2016 in the Global Burden of Disease Study. *The Lancet*. 2017; 390(10111):2437–60.
15. Mungreiphy NK, Dhall M, Tyagi R, et al. Ethnicity, obesity and health pattern among Indian population. *J Nat Sci Biol Med*. 2012;3(1):52–59. doi:10.4103/0976-9668.95955
16. Tripathy JP, Thakur JS, Jeet G, Chawla S, Jain S. Alarming high prevalence of hypertension and pre-hypertension in North India-results from a large cross-sectional STEPS survey. Li Y, ed. *PLoS ONE*. 2017;12(12):e0188619. doi:10.1371/journal.pone.0188619.
17. Anjana RM, Pradeepa R, Deepa M, Datta M, Sudha V, Unnikrishnan R, et al. Prevalence of diabetes and prediabetes (impaired fasting glucose and/or impaired glucose tolerance) in urban and rural India: phase I results of the Indian Council of Medical Research-India DIABetes (ICMR-INDIAB) study. *Diabetologia*. 2011;54(12):3022–7.
18. Hawkes C. Uneven dietary development: linking the policies and processes of globalization with the nutrition transition, obesity and diet-related chronic diseases. *Global Health*. 2006;2:4. Published 2006 Mar 28. doi:10.1186/1744-8603-2-4
19. Warren Smit, Ariane deLannoy, Robert V.H. Dover, Estelle. Lambert, Naomi Levitt, Vanessa Watson. Making unhealthy places: The built environment and non-communicable diseases in Khayelitsha, Cape Town, *Health & Place*, Volume 39, 2016, pp. 196-203
20. Prabhdeep Kaur, Sudha Ramachandra Rao, Ezhil Radhakrishnan. Prevalence, awareness, treatment, control and risk factors for hypertension in a rural population in South India, *International Journal of Public Health*, 2012, Volume 57, Number 1, Page 87
21. Devi, P., Rao, M., Sigamani, A., Faruqui, A., Jose, M., Gupta, R., ... Xavier, D. (2012). Prevalence, risk factors and awareness of hypertension in India: a systematic review. *Journal Of Human Hypertension*, 27, 281. Retrieved from <https://doi.org/10.1038/jhh.2012.33>
22. Deepa M, Anjana RM, Manjula D, Narayan KV, Mohan V. Convergence of prevalence rates of diabetes and cardiometabolic risk factors in middle and low income groups in urban India: 10-year follow-up of the Chennai Urban Population Study. *J Diabetes Sci Technol*. 2011;5(4):918–27.
23. Gowda, M. J., Bhojani, U., Devadasan, N., & Beeranahally, T. S. (2015). The rising burden of chronic conditions among urban poor: a three-year follow-up survey in Bengaluru, India. *BMC Health Services Research*, 15(1), 330. <https://doi.org/10.1186/s12913-015-0999-5>

1  
2  
3  
4 24. Ministry of Health and Family Welfare (2013). National Action Plan and Monitoring  
5 Framework for Prevention and Control of NCDs, New Delhi. Accessed at [https://www.iccp-](https://www.iccp-portal.org/system/files/plans/India%20%20National_Action_Plan_and_Monitoring_Framework_Prevention_NCD_2013.pdf)  
6 [portal.org/system/files/plans/India%20%20National\\_Action\\_Plan\\_and\\_Monitoring\\_Framework](https://www.iccp-portal.org/system/files/plans/India%20%20National_Action_Plan_and_Monitoring_Framework_Prevention_NCD_2013.pdf)  
7 [\\_Prevention\\_NCD\\_2013.pdf](https://www.iccp-portal.org/system/files/plans/India%20%20National_Action_Plan_and_Monitoring_Framework_Prevention_NCD_2013.pdf)  
8  
9

10  
11 Figure 1. Prevalence of hypertension across states, India, 2015-16

12  
13 Figure 2. Prevalence of hypertension across districts, India, 2015-16

14  
15 Figure 3. Prevalence of hypertension by sector across selected states, 2015-16  
16  
17  
18  
19  
20  
21  
22  
23  
24  
25  
26  
27  
28  
29  
30  
31  
32  
33  
34  
35  
36  
37  
38  
39  
40  
41  
42  
43  
44  
45  
46  
47  
48  
49  
50  
51  
52  
53  
54  
55  
56  
57  
58  
59  
60

1  
2  
3  
4  
5  
6  
7  
8  
9  
10  
11  
12  
13  
14  
15  
16  
17  
18  
19  
20  
21  
22  
23  
24  
25  
26  
27  
28  
29  
30  
31  
32  
33  
34  
35  
36  
37  
38  
39  
40  
41  
42  
43  
44  
45  
46  
47  
48  
49  
50  
51  
52  
53  
54  
55  
56  
57  
58  
59  
60



Fig 1. Prevalence of hypertension across states, India, 2015-16  
228x161mm (220 x 220 DPI)

1  
2  
3  
4  
5  
6  
7  
8  
9  
10  
11  
12  
13  
14  
15  
16  
17  
18  
19  
20  
21  
22  
23  
24  
25  
26  
27  
28  
29  
30  
31  
32  
33  
34  
35  
36  
37  
38  
39  
40  
41  
42  
43  
44  
45  
46  
47  
48  
49  
50  
51  
52  
53  
54  
55  
56  
57  
58  
59  
60



Figure 2. Prevalence of hypertension across districts, India, 2015-16

145x185mm (300 x 300 DPI)

1  
2  
3  
4  
5  
6  
7  
8  
9  
10  
11  
12  
13  
14  
15  
16  
17  
18  
19  
20  
21  
22  
23  
24  
25  
26  
27  
28  
29  
30  
31  
32  
33  
34  
35  
36  
37  
38  
39  
40  
41  
42  
43  
44  
45  
46  
47  
48  
49  
50  
51  
52  
53  
54  
55  
56  
57  
58  
59  
60



Figure3. Prevalence of hypertension by sector across selected states, 2015-16

165x87mm (150 x 150 DPI)



153x211mm (150 x 150 DPI)





127x159mm (150 x 150 DPI)

1  
2  
3  
4  
5  
6  
7  
8  
9  
10  
11  
12  
13  
14  
15  
16  
17  
18  
19  
20  
21  
22  
23  
24  
25  
26  
27  
28  
29  
30  
31  
32  
33  
34  
35  
36  
37  
38  
39  
40  
41  
42  
43  
44  
45  
46  
47  
48  
49  
50  
51  
52  
53  
54  
55  
56  
57  
58  
59  
60



228x71mm (150 x 150 DPI)

1  
2  
3  
4  
5  
6  
7  
8  
9  
10  
11  
12  
13  
14  
15  
16  
17  
18  
19  
20  
21  
22  
23  
24  
25  
26  
27  
28  
29  
30  
31  
32  
33  
34  
35  
36  
37  
38  
39  
40  
41  
42  
43  
44  
45  
46  
47  
48  
49  
50  
51  
52  
53  
54  
55  
56  
57  
58  
59  
60



Note: The source of GDP data is Central Statistics Office, Ministry of Statistics and Programme Implementation, Government of India

215x279mm (300 x 300 DPI)

**STROBE 2007 (v4) Statement—Checklist of items that should be included in reports of *cross-sectional studies***

| Section/Topic                | Item # | Recommendation                                                                                                                                                                       | Reported on page # |
|------------------------------|--------|--------------------------------------------------------------------------------------------------------------------------------------------------------------------------------------|--------------------|
| <b>Title and abstract</b>    | 1      | (a) Indicate the study's design with a commonly used term in the title or the abstract                                                                                               | 2                  |
|                              |        | (b) Provide in the abstract an informative and balanced summary of what was done and what was found                                                                                  | 2                  |
| <b>Introduction</b>          |        |                                                                                                                                                                                      |                    |
| Background/rationale         | 2      | Explain the scientific background and rationale for the investigation being reported                                                                                                 | 4                  |
| Objectives                   | 3      | State specific objectives, including any prespecified hypotheses                                                                                                                     | 5                  |
| <b>Methods</b>               |        |                                                                                                                                                                                      |                    |
| Study design                 | 4      | Present key elements of study design early in the paper                                                                                                                              | 5                  |
| Setting                      | 5      | Describe the setting, locations, and relevant dates, including periods of recruitment, exposure, follow-up, and data collection                                                      | 5                  |
| Participants                 | 6      | (a) Give the eligibility criteria, and the sources and methods of selection of participants                                                                                          | 5                  |
| Variables                    | 7      | Clearly define all outcomes, exposures, predictors, potential confounders, and effect modifiers. Give diagnostic criteria, if applicable                                             | 5-6                |
| Data sources/<br>measurement | 8*     | For each variable of interest, give sources of data and details of methods of assessment (measurement). Describe comparability of assessment methods if there is more than one group | 6                  |
| Bias                         | 9      | Describe any efforts to address potential sources of bias                                                                                                                            | 6                  |
| Study size                   | 10     | Explain how the study size was arrived at                                                                                                                                            | 5                  |
| Quantitative variables       | 11     | Explain how quantitative variables were handled in the analyses. If applicable, describe which groupings were chosen and why                                                         | 6                  |
| Statistical methods          | 12     | (a) Describe all statistical methods, including those used to control for confounding                                                                                                | 6                  |
|                              |        | (b) Describe any methods used to examine subgroups and interactions                                                                                                                  | 6                  |
|                              |        | (c) Explain how missing data were addressed                                                                                                                                          | 6                  |
|                              |        | (d) If applicable, describe analytical methods taking account of sampling strategy                                                                                                   | 6                  |
|                              |        | (e) Describe any sensitivity analyses                                                                                                                                                |                    |
| <b>Results</b>               |        |                                                                                                                                                                                      |                    |

|                          |     |                                                                                                                                                                                                                                                                                                                                                                                                               |       |
|--------------------------|-----|---------------------------------------------------------------------------------------------------------------------------------------------------------------------------------------------------------------------------------------------------------------------------------------------------------------------------------------------------------------------------------------------------------------|-------|
| Participants             | 13* | (a) Report numbers of individuals at each stage of study—eg numbers potentially eligible, examined for eligibility, confirmed eligible, included in the study, completing follow-up, and analysed<br>(b) Give reasons for non-participation at each stage<br>(c) Consider use of a flow diagram                                                                                                               | 8     |
| Descriptive data         | 14* | (a) Give characteristics of study participants (eg demographic, clinical, social) and information on exposures and potential confounders<br>(b) Indicate number of participants with missing data for each variable of interest                                                                                                                                                                               | 8     |
| Outcome data             | 15* | Report numbers of outcome events or summary measures                                                                                                                                                                                                                                                                                                                                                          | 9     |
| Main results             | 16  | (a) Give unadjusted estimates and, if applicable, confounder-adjusted estimates and their precision (eg, 95% confidence interval). Make clear which confounders were adjusted for and why they were included<br>(b) Report category boundaries when continuous variables were categorized<br>(c) If relevant, consider translating estimates of relative risk into absolute risk for a meaningful time period | 9-12  |
| Other analyses           | 17  | Report other analyses done—eg analyses of subgroups and interactions, and sensitivity analyses                                                                                                                                                                                                                                                                                                                |       |
| <b>Discussion</b>        |     |                                                                                                                                                                                                                                                                                                                                                                                                               |       |
| Key results              | 18  | Summarise key results with reference to study objectives                                                                                                                                                                                                                                                                                                                                                      | 13-15 |
| Limitations              | 19  | Discuss limitations of the study, taking into account sources of potential bias or imprecision. Discuss both direction and magnitude of any potential bias                                                                                                                                                                                                                                                    | 15    |
| Interpretation           | 20  | Give a cautious overall interpretation of results considering objectives, limitations, multiplicity of analyses, results from similar studies, and other relevant evidence                                                                                                                                                                                                                                    | 16    |
| Generalisability         | 21  | Discuss the generalisability (external validity) of the study results                                                                                                                                                                                                                                                                                                                                         | 13    |
| <b>Other information</b> |     |                                                                                                                                                                                                                                                                                                                                                                                                               |       |
| Funding                  | 22  | Give the source of funding and the role of the funders for the present study and, if applicable, for the original study on which the present article is based                                                                                                                                                                                                                                                 | 1     |

\*Give information separately for cases and controls in case-control studies and, if applicable, for exposed and unexposed groups in cohort and cross-sectional studies.

**Note:** An Explanation and Elaboration article discusses each checklist item and gives methodological background and published examples of transparent reporting. The STROBE checklist is best used in conjunction with this article (freely available on the Web sites of PLoS Medicine at <http://www.plosmedicine.org/>, Annals of Internal Medicine at <http://www.annals.org/>, and Epidemiology at <http://www.epidem.com/>). Information on the STROBE Initiative is available at [www.strobe-statement.org](http://www.strobe-statement.org).
