# Supplementary material for: Prevalence and associated risk factors of hypertension among persons aged 15–49 in India: a cross-sectional study
Source: PubMed Central journal article supplement — BMJ Open. 2019 Dec 16;9(12):e029714. doi: 10.1136/bmjopen-2019-029714 (PMC6937064; doi:10.1136/bmjopen-2019-029714), 2019-12-16
Supplement: bmjopen-2019-029714supp004.pdf [file bmjopen-2019-029714supp004.pdf]

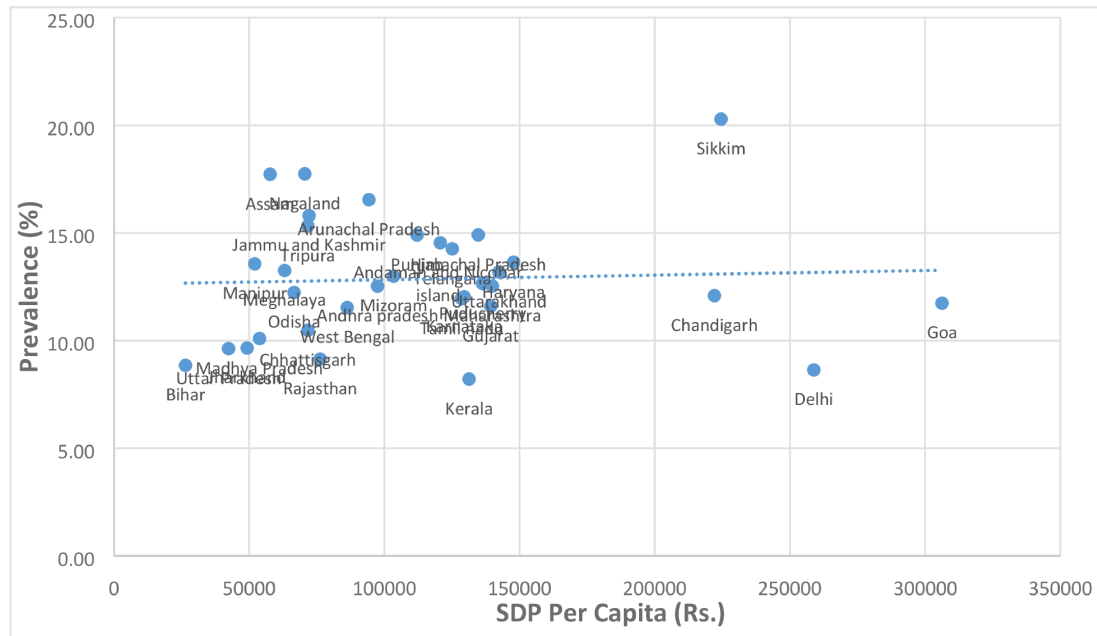

Note: The source of GDP data is Central Statistics Office, Ministry of Statistics and Programme Implementation, Government of India
